# Supplementary material
Source: publisher figshare collection journal article supplement (https://acs.figshare.com/ndownloader/files/3828325)

## Experimental Studies on the Selective $\beta$ -C-H Halogenation of Enones

Tatjana Huber, Daniel Kaiser, Jens Rickmeier, and Thomas Magauer\*

Department of Chemistry, Ludwig–Maximilians-Universität, Butenandtstrasse 5–13,  
81377 Munich, Germany

|      |                                                        |   |
|------|--------------------------------------------------------|---|
| I.   | $^1\text{H}$ NMR experiments.....                      | 2 |
| II.  | X-Ray Crystallographic Data .....                      | 4 |
| III. | $^1\text{H}$ NMR and $^{13}\text{C}$ NMR spectra ..... | 6 |

## I. $^1\text{H}$ NMR experiments

**Monitoring of the reaction of Selectfluor<sup>TM</sup> with 17c via  $^1\text{H}$  NMR spectroscopy.** Selectfluor<sup>TM</sup> (**28**) (39.0 mg, 0.11 mmol, 1.10 equiv) was suspended in  $\text{d}_3$ -acetonitrile (1 mL,  $c = 0.1$  M) and stirring was continued until a suspension was obtained (no remaining precipitate). *tert*-Butyl 2-(cyclohex-2-en-1-ylidene)hydrazinecarboxylate (**17c**) (21.0 mg, 0.10 mmol, 1 equiv,  $\text{dr} = 4:1$ ) then was added and the reaction was monitored via  $^1\text{H}$  NMR.

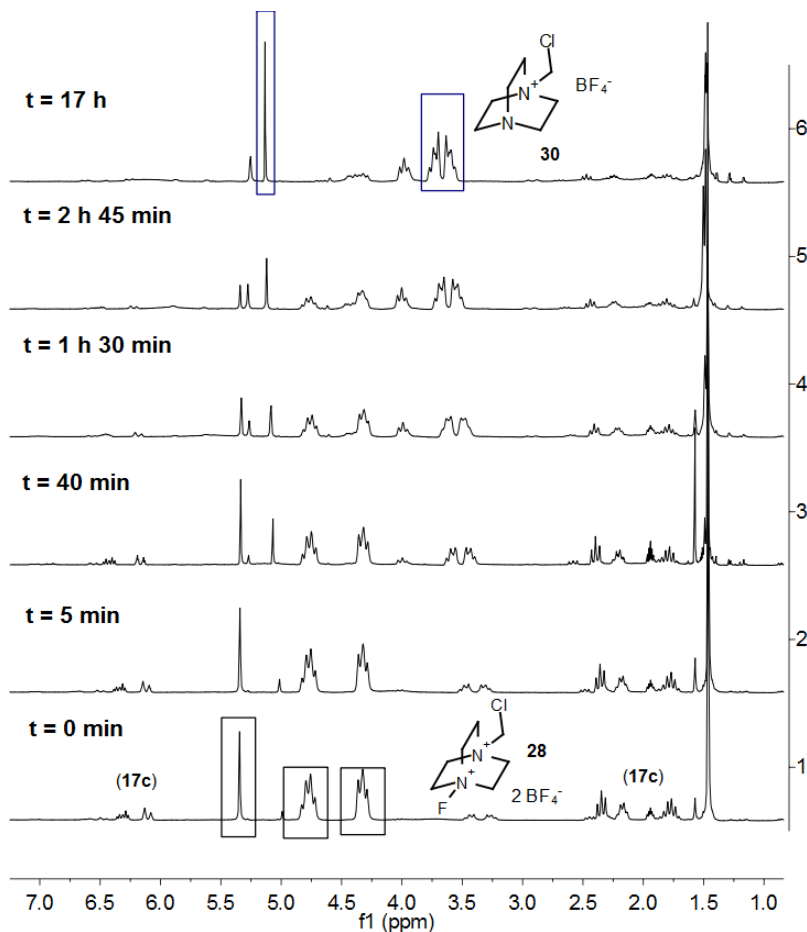

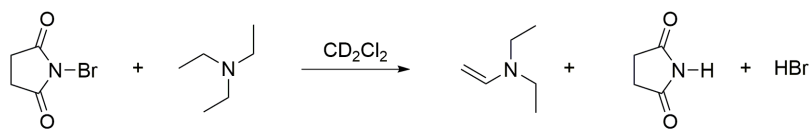

23

**Monitoring the reaction between *N*-bromosuccinimide and triethylamine.** *N*-Bromosuccinimide (14.2 mg, 0.08 mmol, 1 equiv) was dissolved in  $d_2$ -dichloromethane (0.8 mL) and the resulting solution was transferred to a NMR tube. Triethylamine (11.1  $\mu$ L, 0.08 mmol, 1 equiv) was added and the progress of the reaction was monitored by  $^1\text{H}$  NMR.

**23:**

$^1\text{H}$  NMR (400 MHz,  $\text{CDCl}_3$ )  $\delta$  5.15 (dd,  $J = 10.0, 5.3$  Hz, 1H), 4.32 (t,  $J = 10.1$  Hz, 1H), 3.71 (dd,  $J = 10.2, 5.3$  Hz, 1H). (Ethyl signals for triethylamine and triethylammonium salt overlap and could therefore not be determined).

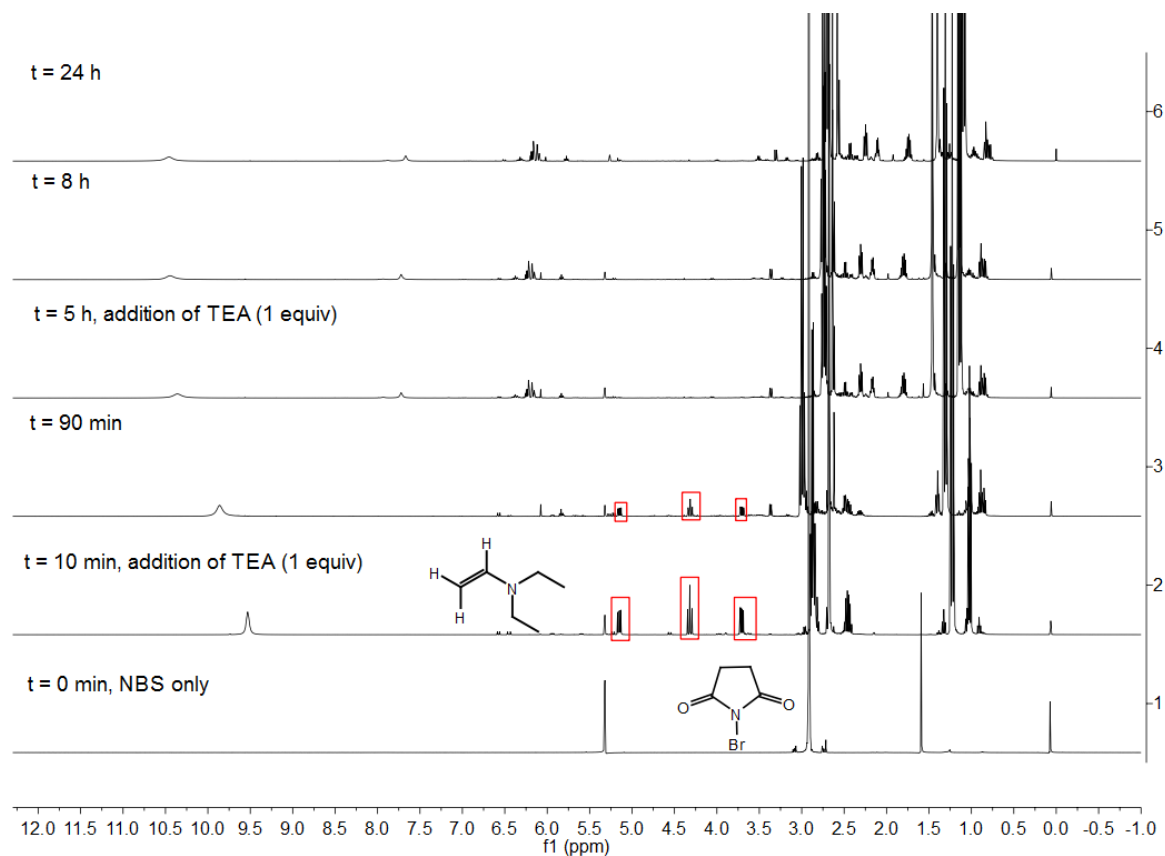

## II. X-Ray Crystallographic Data

**CCDC 1034038** contains the supplementary crystallographic data for allylic bromide **22**. These data can be obtained free of charge from The Cambridge Crystallographic Data Centre (CCDC) via [www.ccdc.cam.ac.uk/data\\_request/cif](http://www.ccdc.cam.ac.uk/data_request/cif).

**Table 1.** Crystallographic data for allylic bromide **22**.

|                                           |                                                                 |
|-------------------------------------------|-----------------------------------------------------------------|
| net formula                               | C <sub>11</sub> H <sub>17</sub> BrN <sub>2</sub> O <sub>2</sub> |
| <i>M<sub>r</sub></i> /g·mol <sup>-1</sup> | 289.169                                                         |
| crystal size/mm                           | 0.117×0.029×0.027                                               |
| <i>T</i> /K                               | 173(2)                                                          |
| radiation                                 | Mo Kα                                                           |
| diffractometer                            | Bruker D8Venture                                                |
| crystal system                            | triclinic                                                       |
| space group                               | <i>P</i> 1bar                                                   |
| <i>a</i> /Å                               | 5.909(2)                                                        |
| <i>b</i> /Å                               | 9.420(3)                                                        |
| <i>c</i> /Å                               | 12.251(4)                                                       |
| α/°                                       | 97.002(10)                                                      |
| β/°                                       | 92.212(9)                                                       |
| γ/°                                       | 103.538(10)                                                     |
| <i>V</i> /Å <sup>3</sup>                  | 656.4(4)                                                        |
| <i>Z</i>                                  | 2                                                               |
| calc. density/g cm <sup>-3</sup>          | 1.4631(9)                                                       |
| μ/mm <sup>-1</sup>                        | 3.121                                                           |
| absorption correction                     | multi-scan                                                      |
| transmission factor range                 | 0.5932–0.9579                                                   |
| refls. measured                           | 2416                                                            |
| <i>R</i> <sub>int</sub>                   | 0.0000                                                          |
| mean σ( <i>I</i> )/ <i>I</i>              | 0.1845                                                          |
| θ range                                   | 3.36–25.13                                                      |
| observed refls.                           | 1438                                                            |

|                                        |                |
|----------------------------------------|----------------|
| $x, y$ (weighting scheme)              | 0.1577, 1.6742 |
| hydrogen refinement                    | constr         |
| refls in refinement                    | 2454           |
| parameters                             | 149            |
| restraints                             | 0              |
| $R(F_{\text{obs}})$                    | 0.1051         |
| $R_w(F^2)$                             | 0.3029         |
| S                                      | 1.091          |
| shift/error <sub>max</sub>             | 0.001          |
| max electron density/e Å <sup>-3</sup> | 1.496          |
| min electron density/e Å <sup>-3</sup> | -0.729         |

---

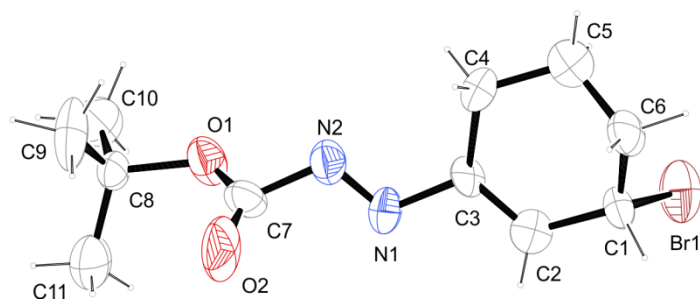

### III. $^1\text{H}$ NMR and $^{13}\text{C}$ NMR spectra

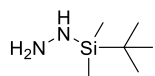

**58**  
 $\text{CDCl}_3$ , 300 MHz

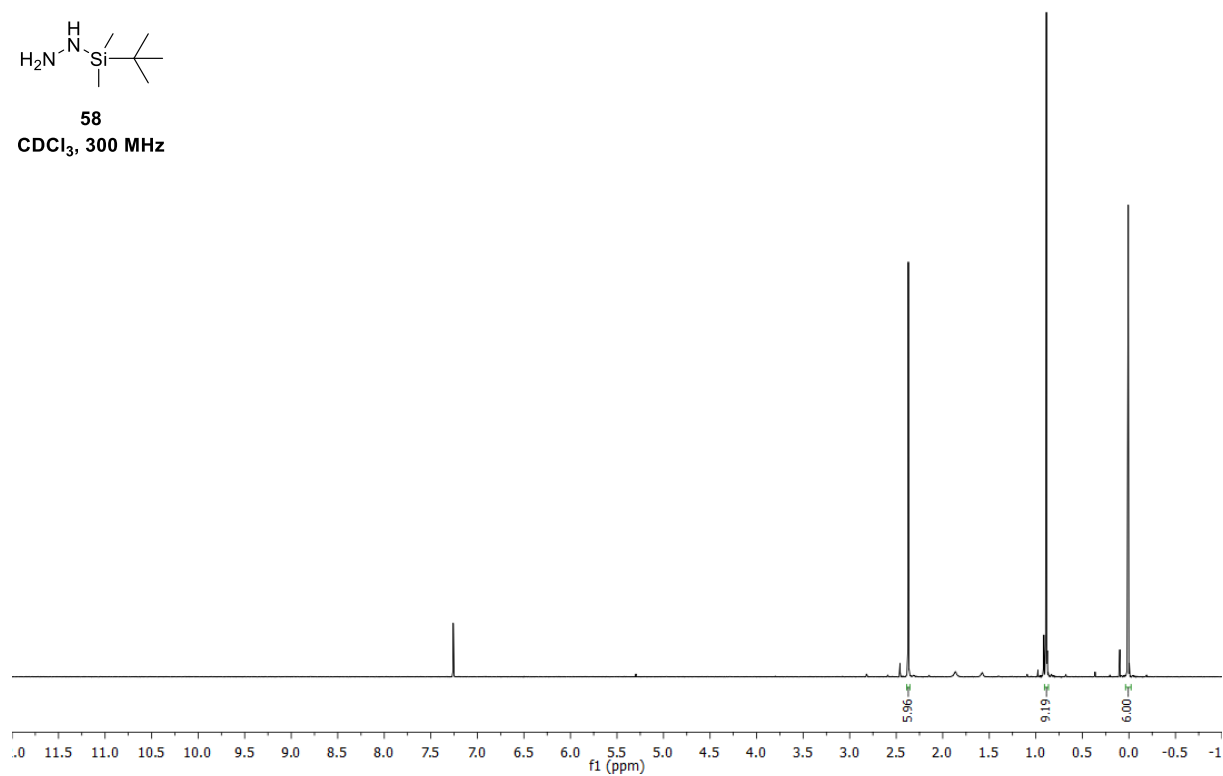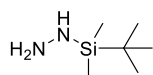

**58**  
 $\text{CDCl}_3$ , 75 MHz

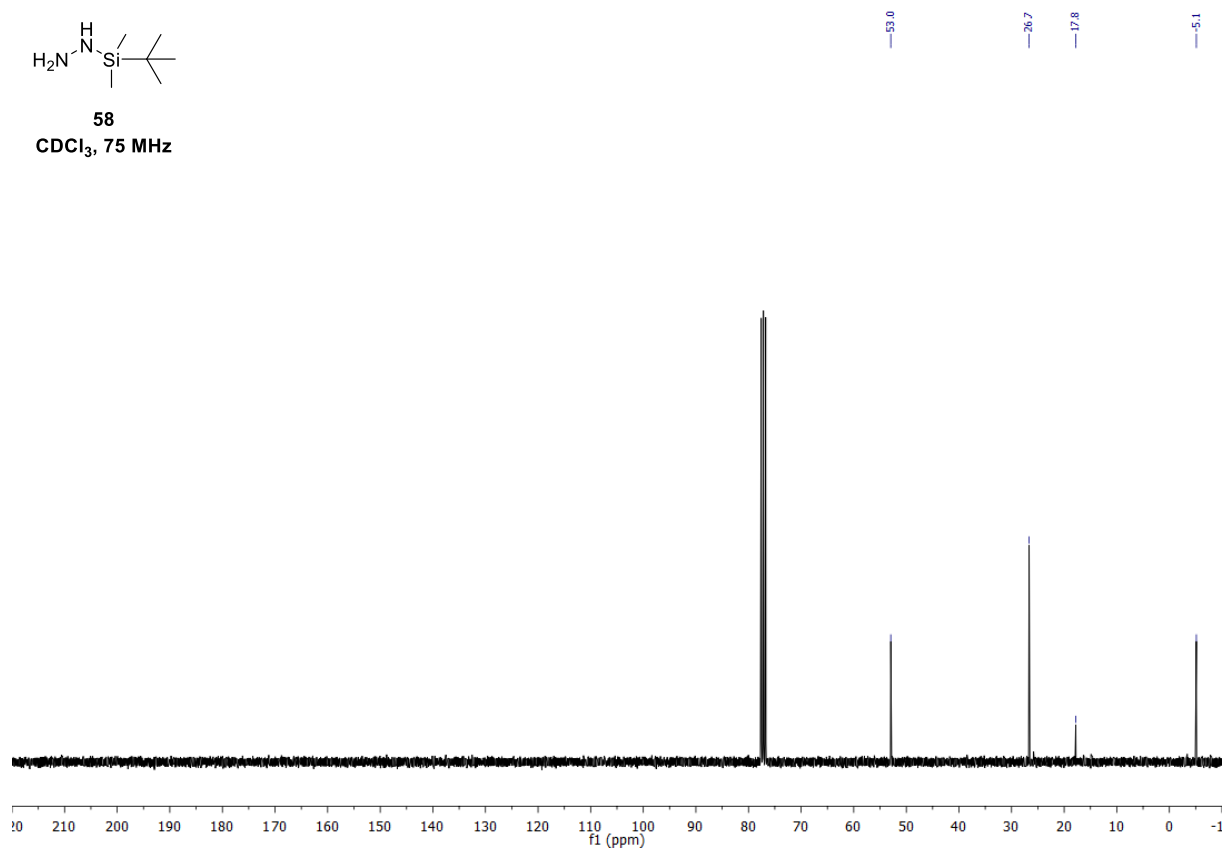

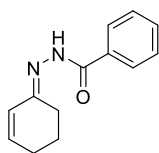

**17b**  
CDCl<sub>3</sub>, 400 MHz

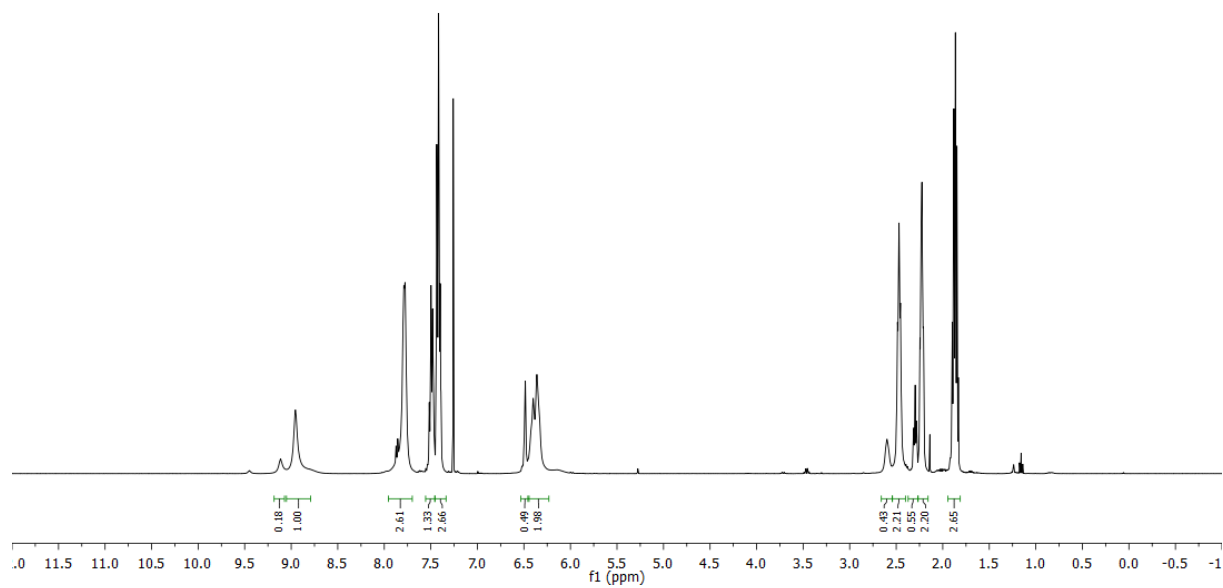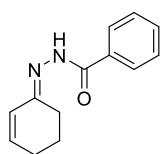

**17b**  
CDCl<sub>3</sub>, 100 MHz

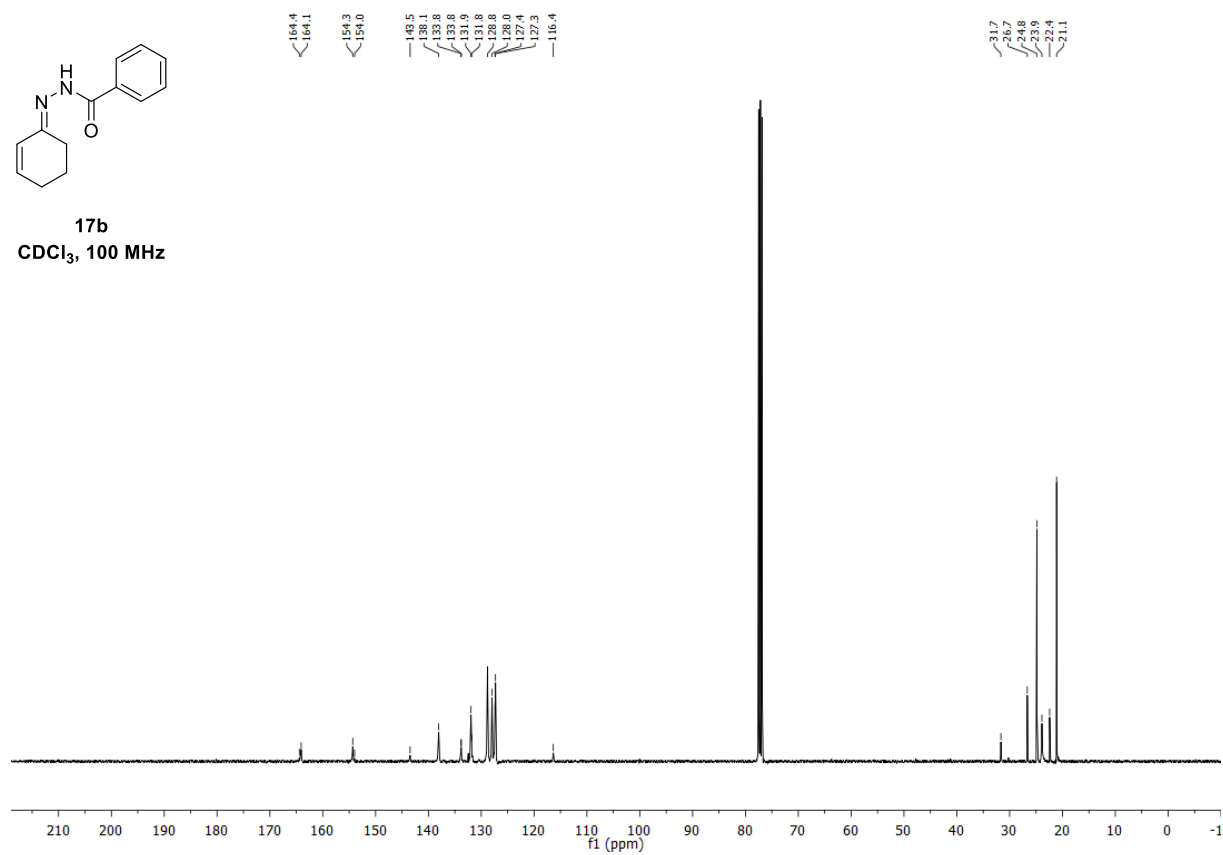

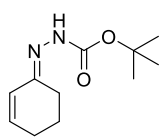

**17c**  
CDCl<sub>3</sub>, 400 MHz

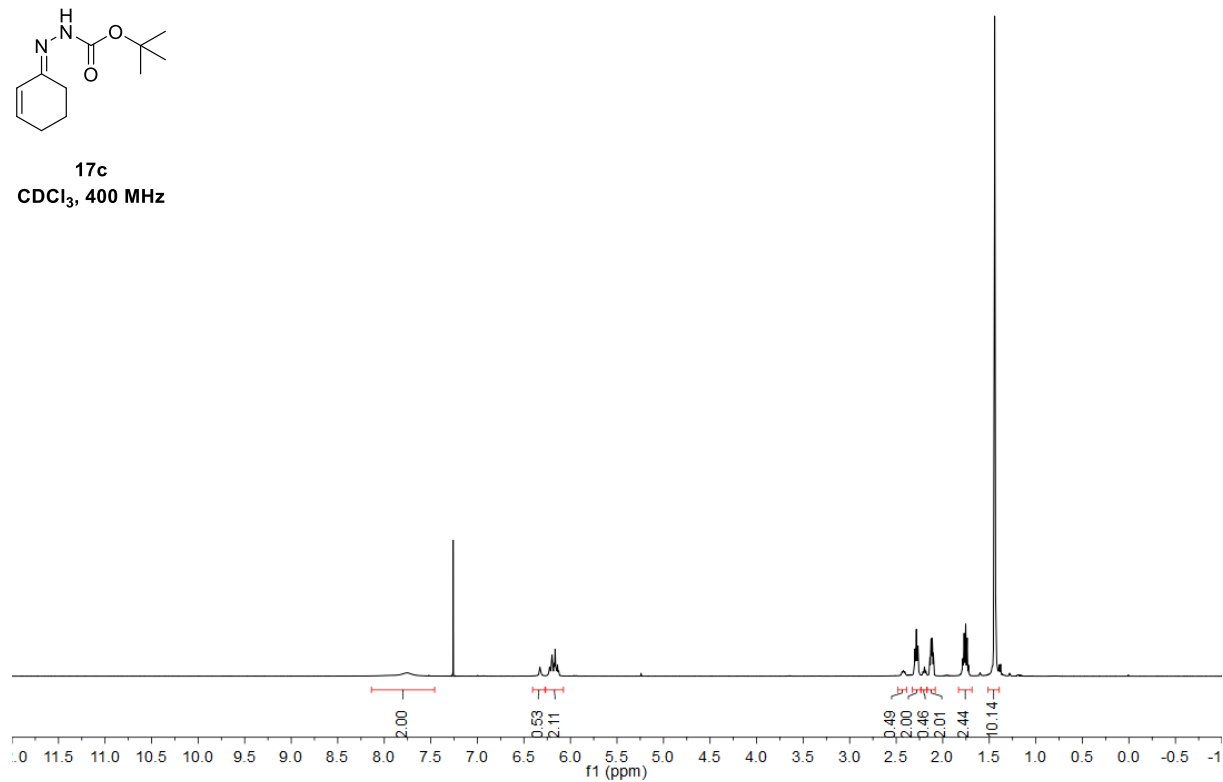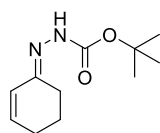

**17c**  
CDCl<sub>3</sub>, 100 MHz

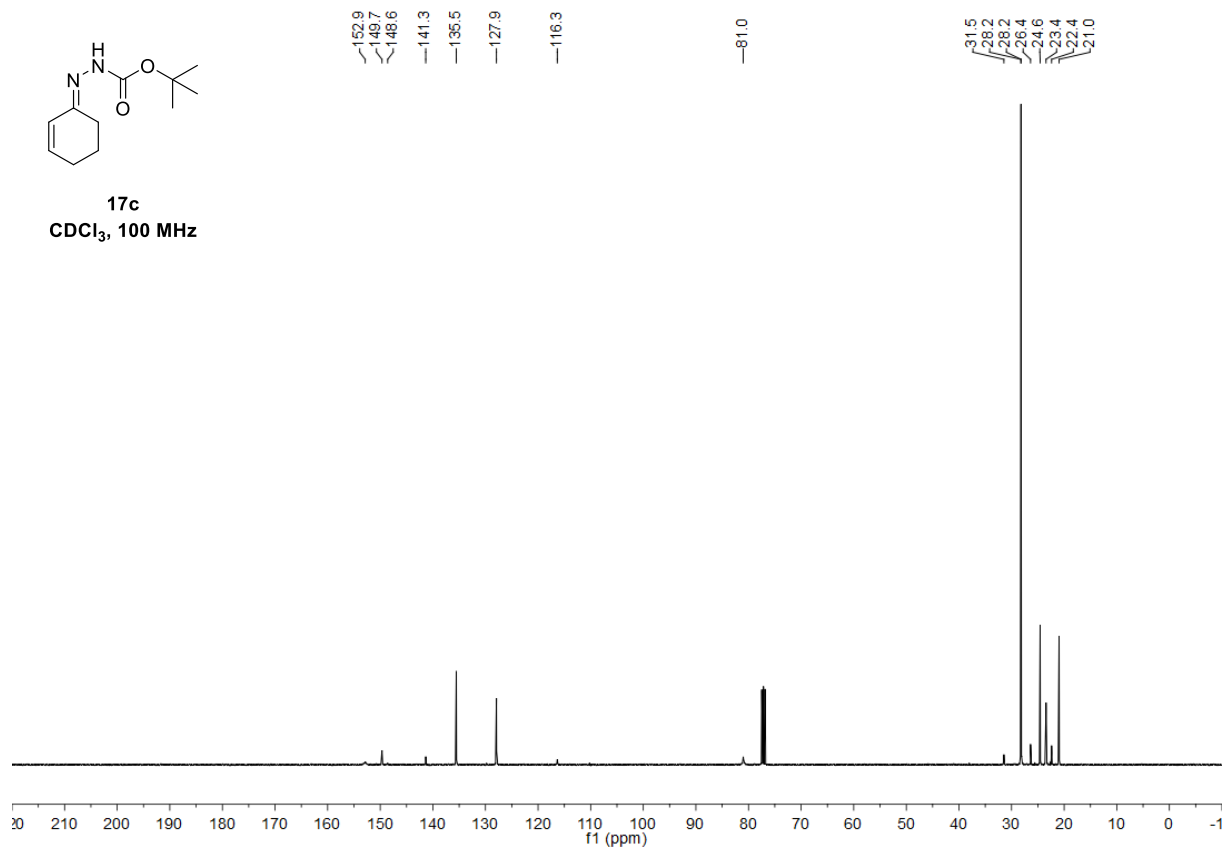



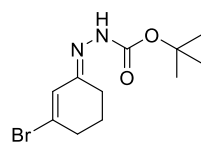

**18c**  
CDCl<sub>3</sub>, 600 MHz

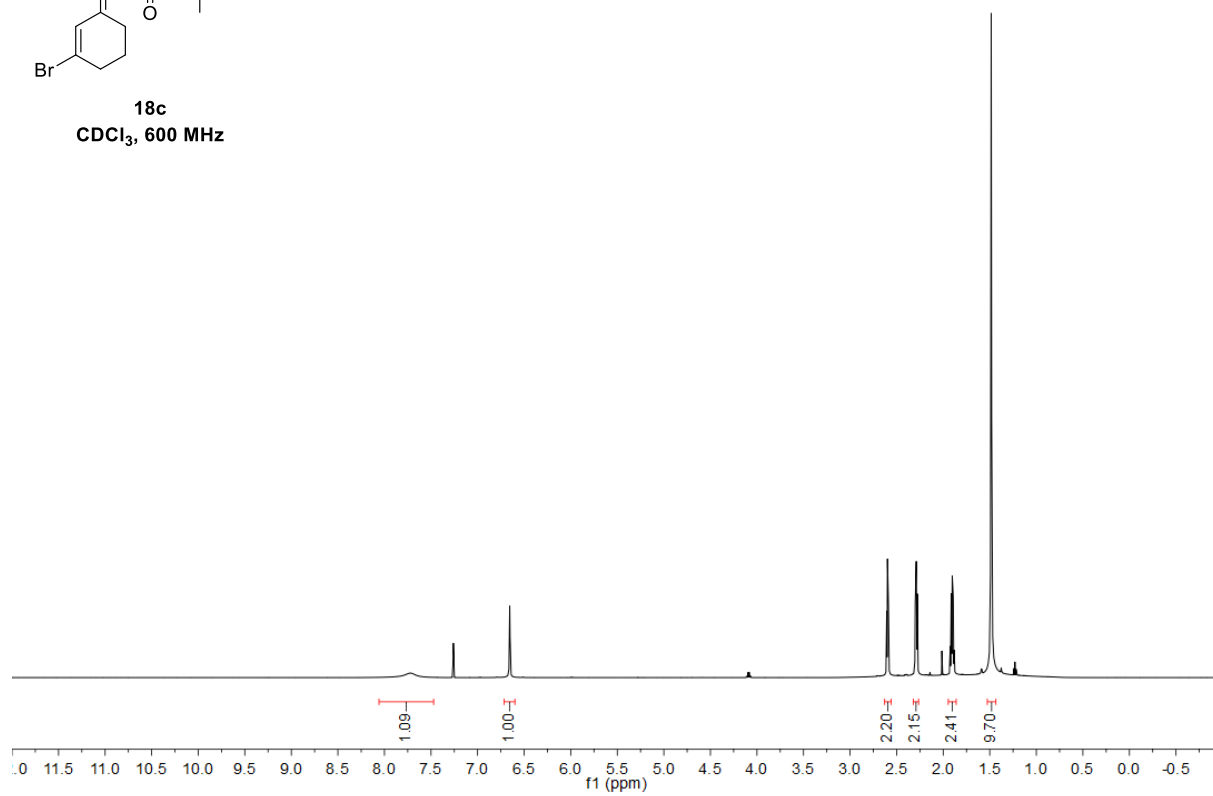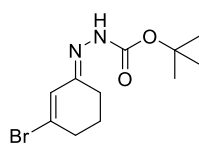

**18c**  
CDCl<sub>3</sub>, 150 MHz

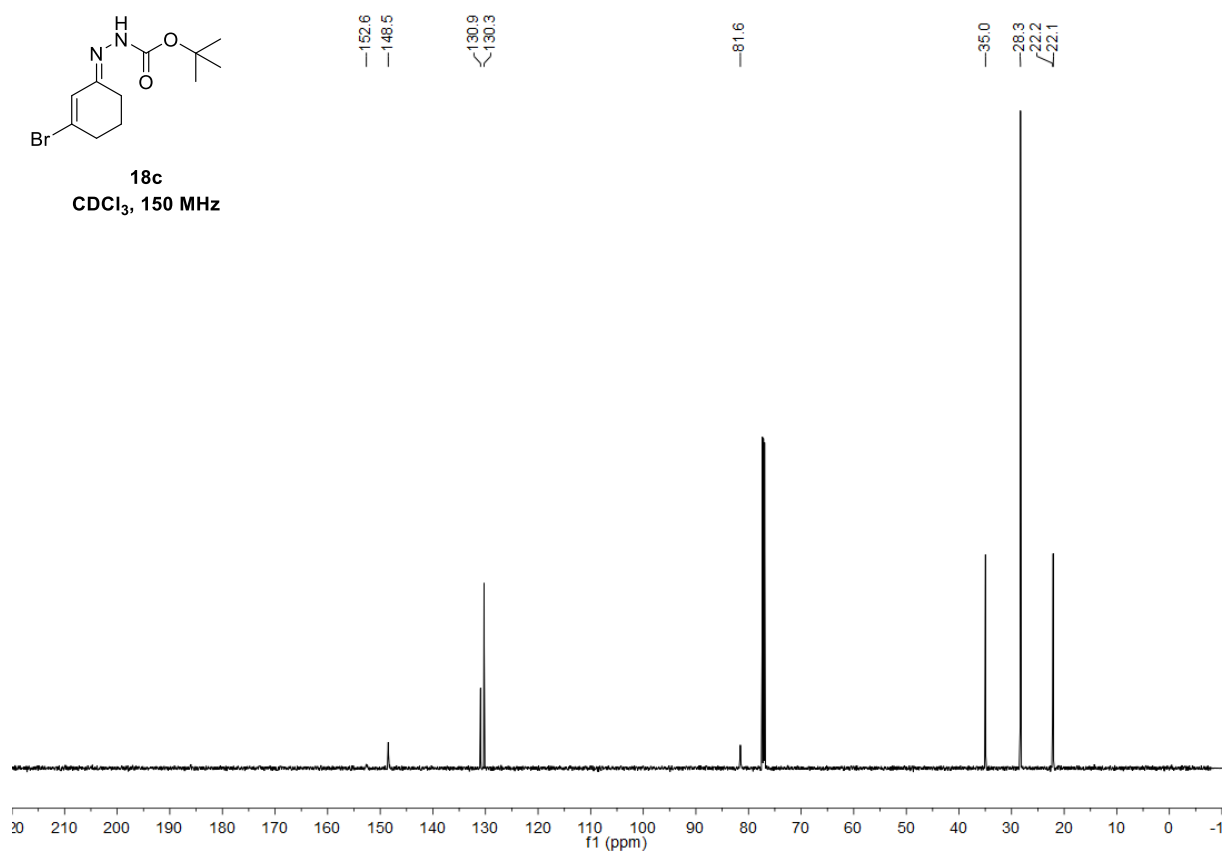

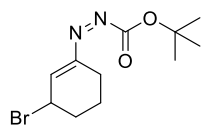

**22**  
CDCl<sub>3</sub>, 400 MHz

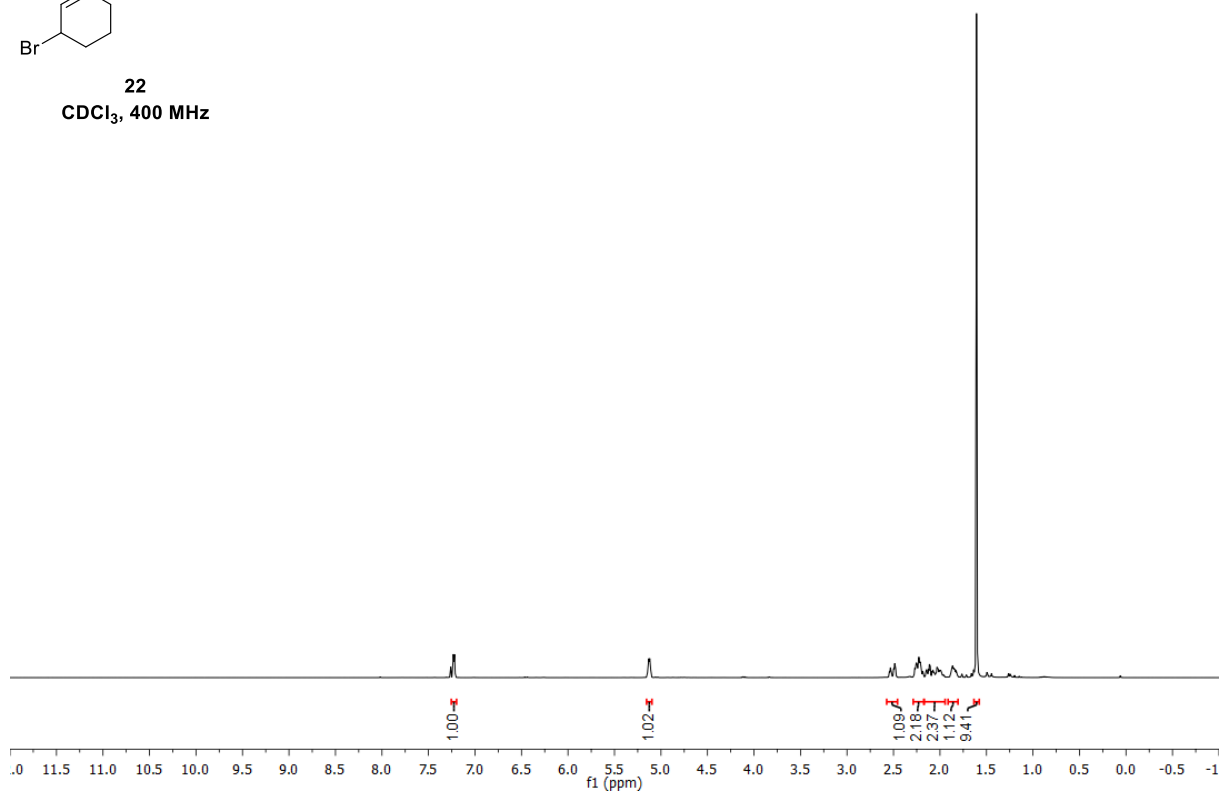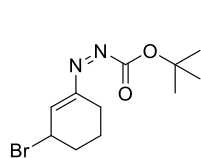

**22**  
CDCl<sub>3</sub>, 100 MHz

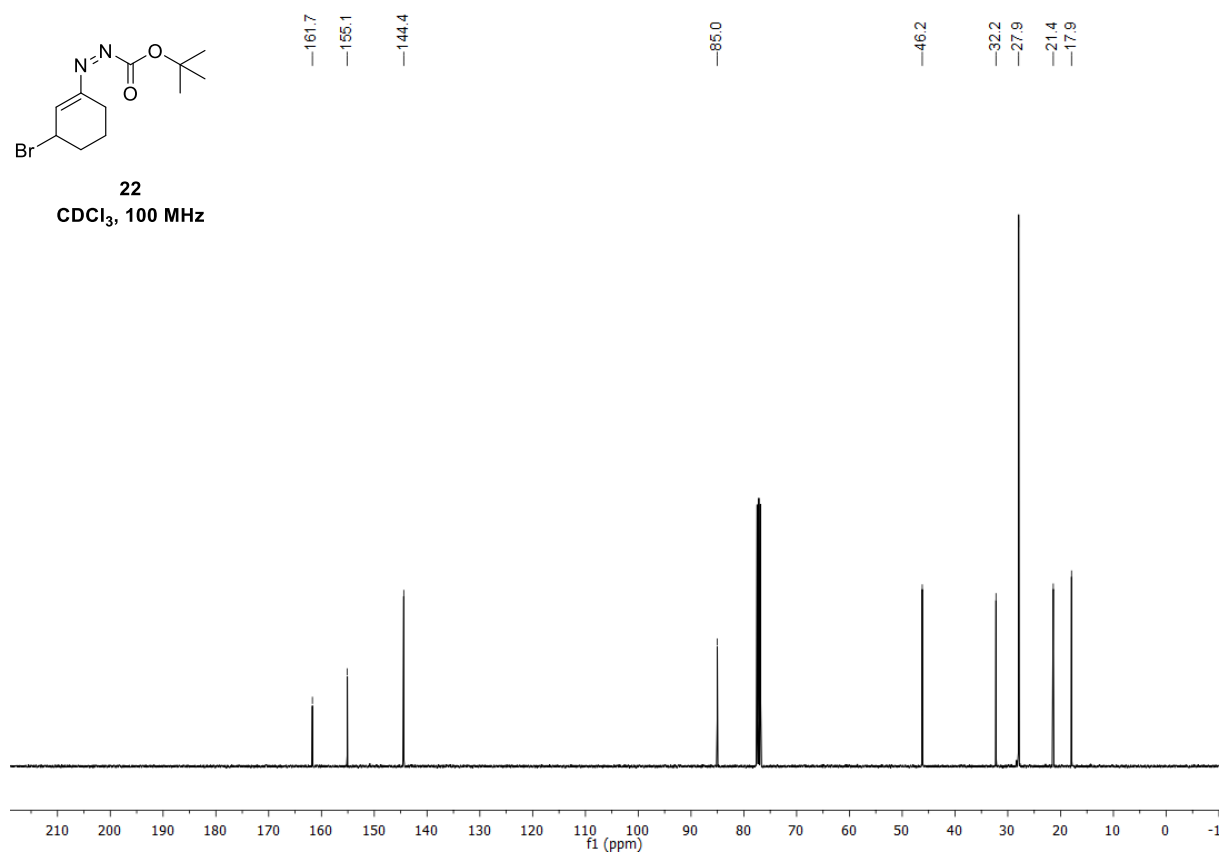

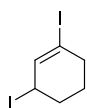

27  
CDCl<sub>3</sub>, 400 MHz

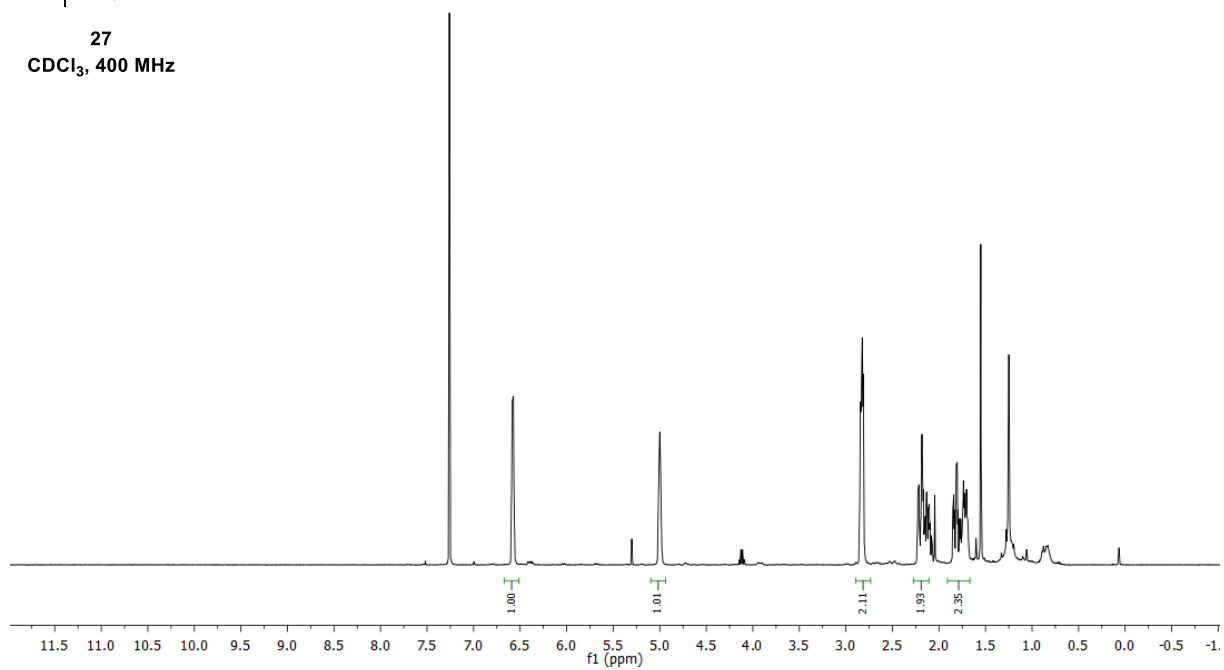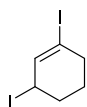

27  
CDCl<sub>3</sub>, 100 MHz

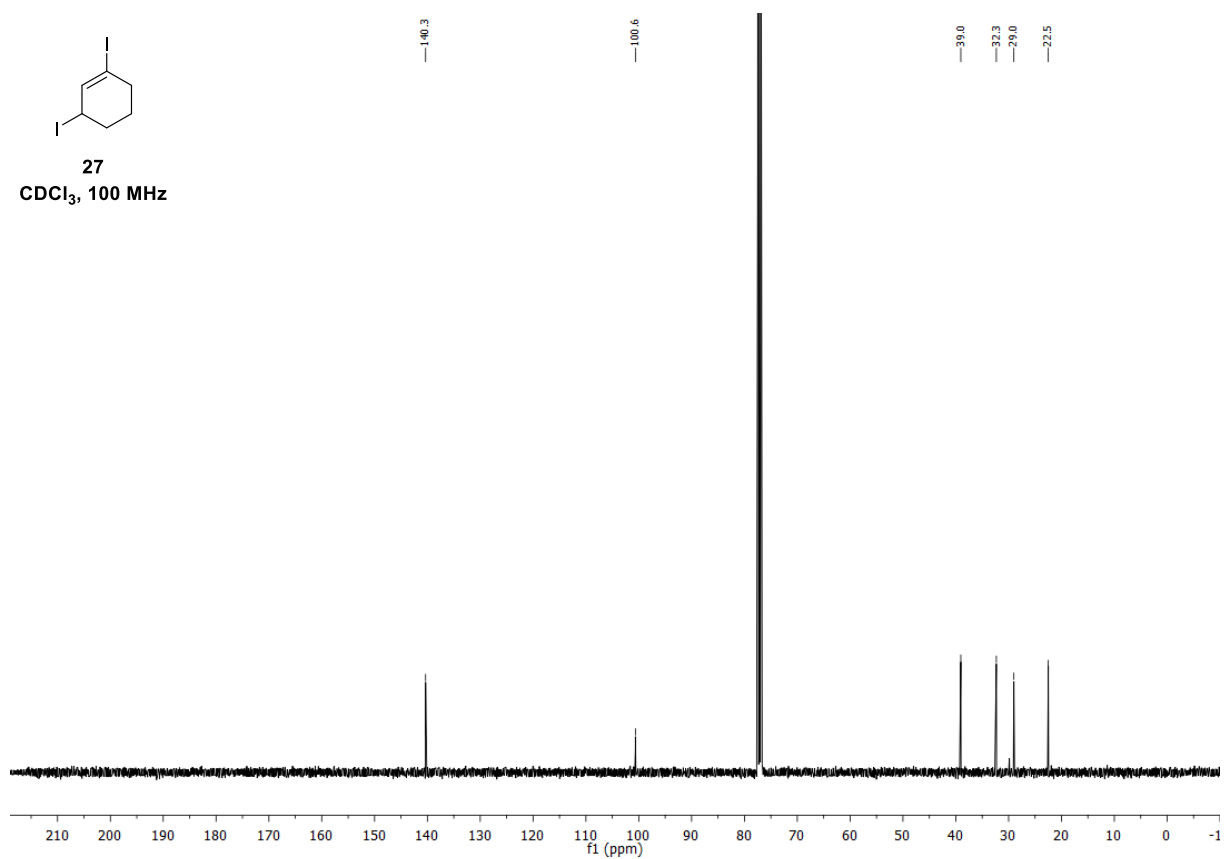

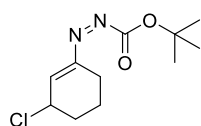

**24**  
**CDCl<sub>3</sub>, 400 MHz**

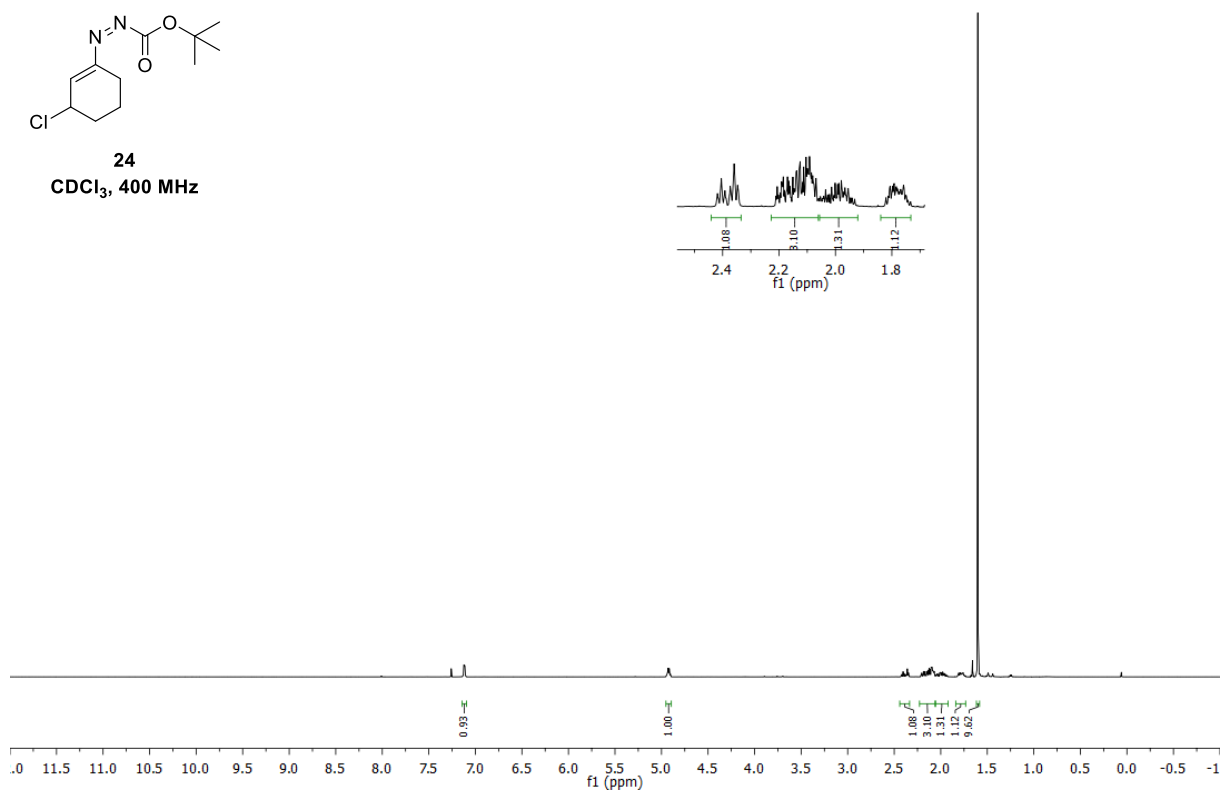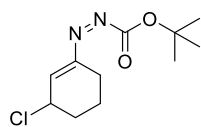

**24**  
**CDCl<sub>3</sub>, 100 MHz**

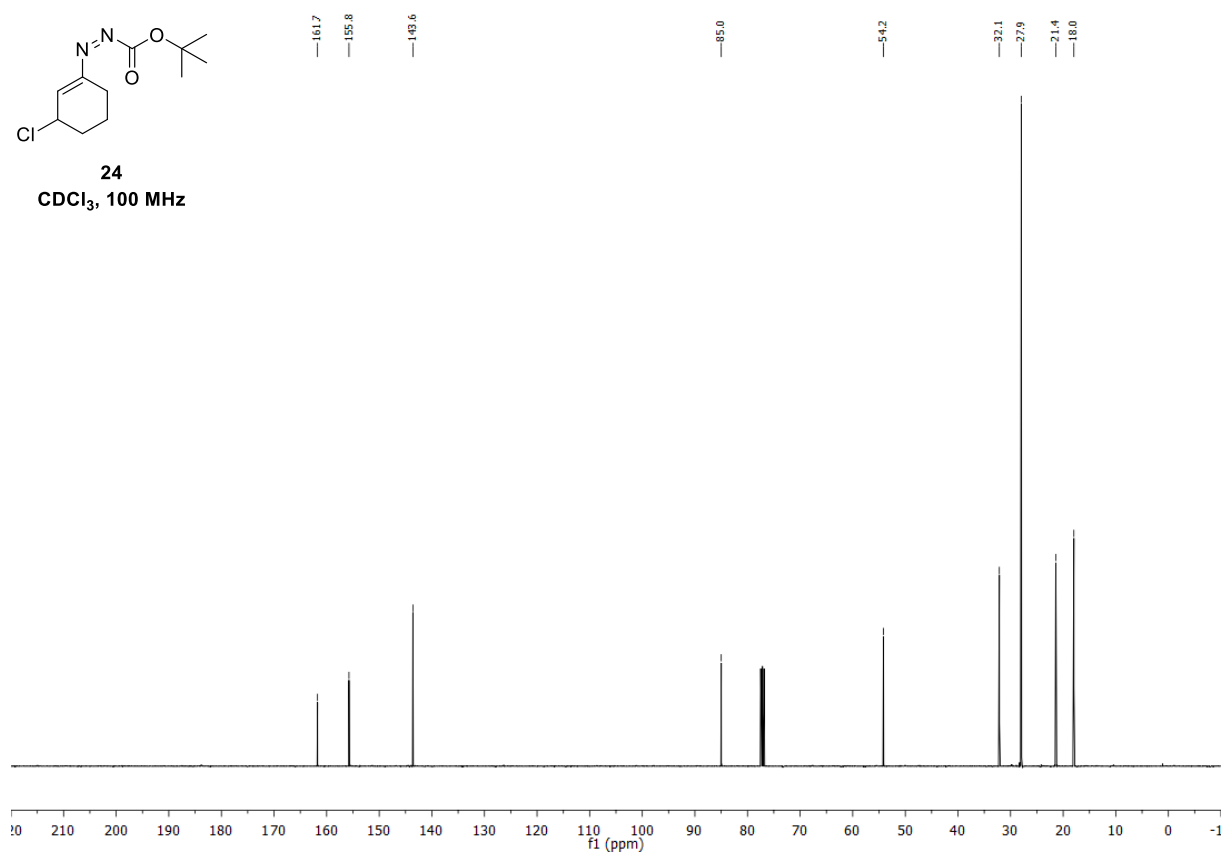

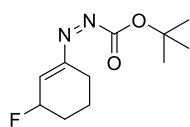

**29**  
CDCl<sub>3</sub>, 600 MHz

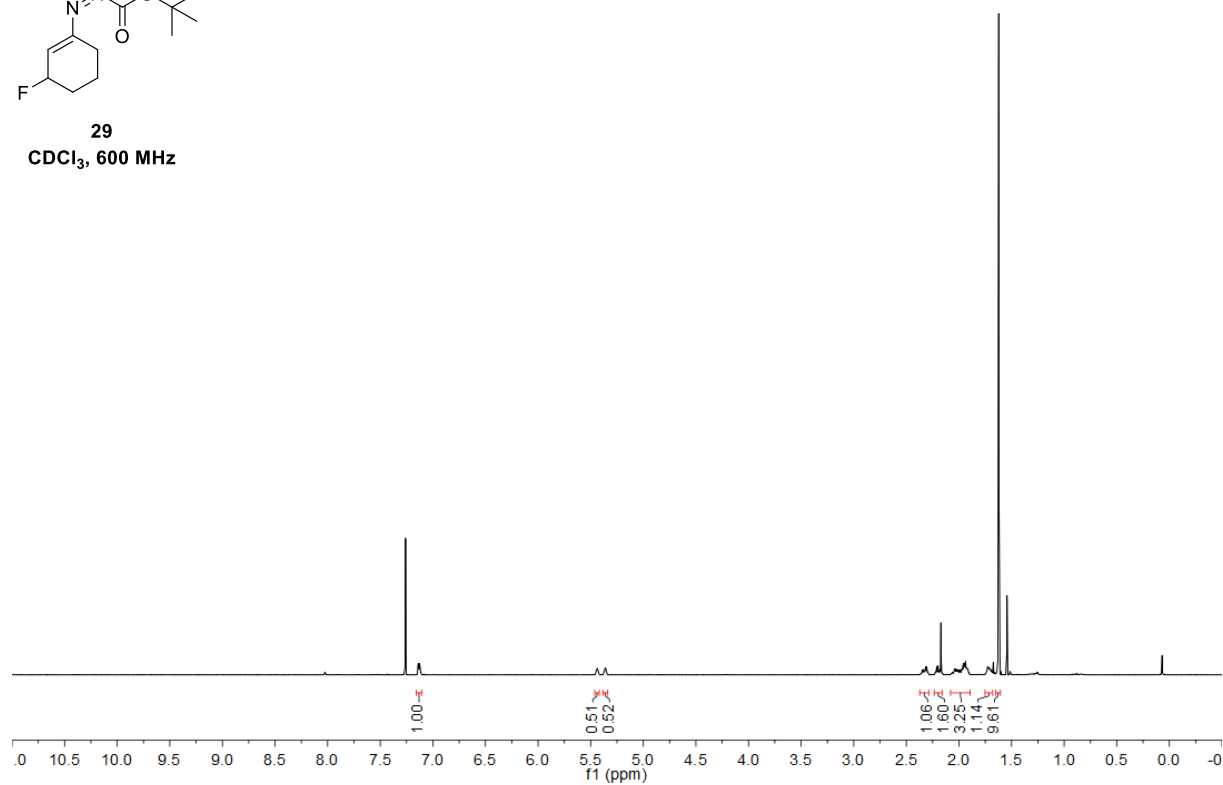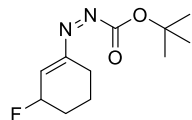

**29**  
CDCl<sub>3</sub>, 150 MHz

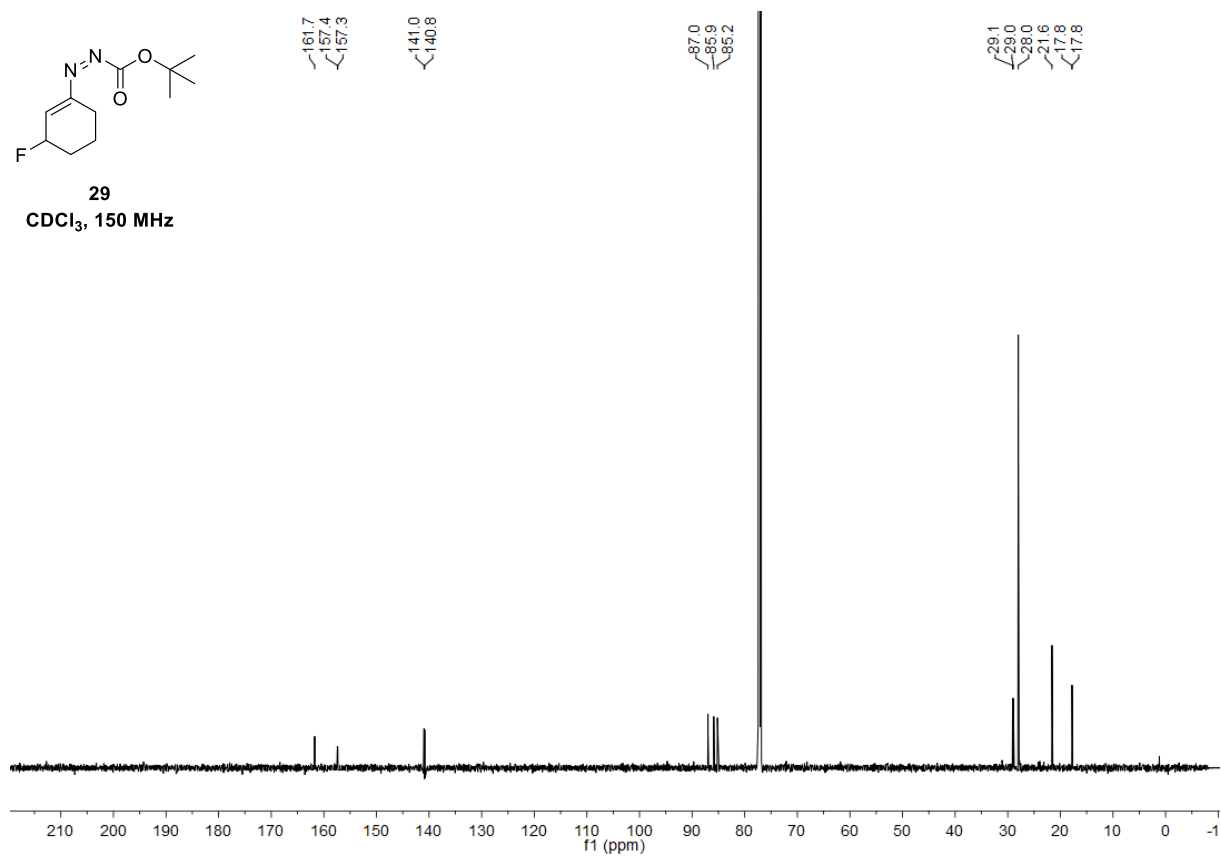

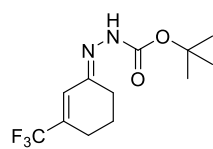

**59**  
CDCl<sub>3</sub>, 400 MHz

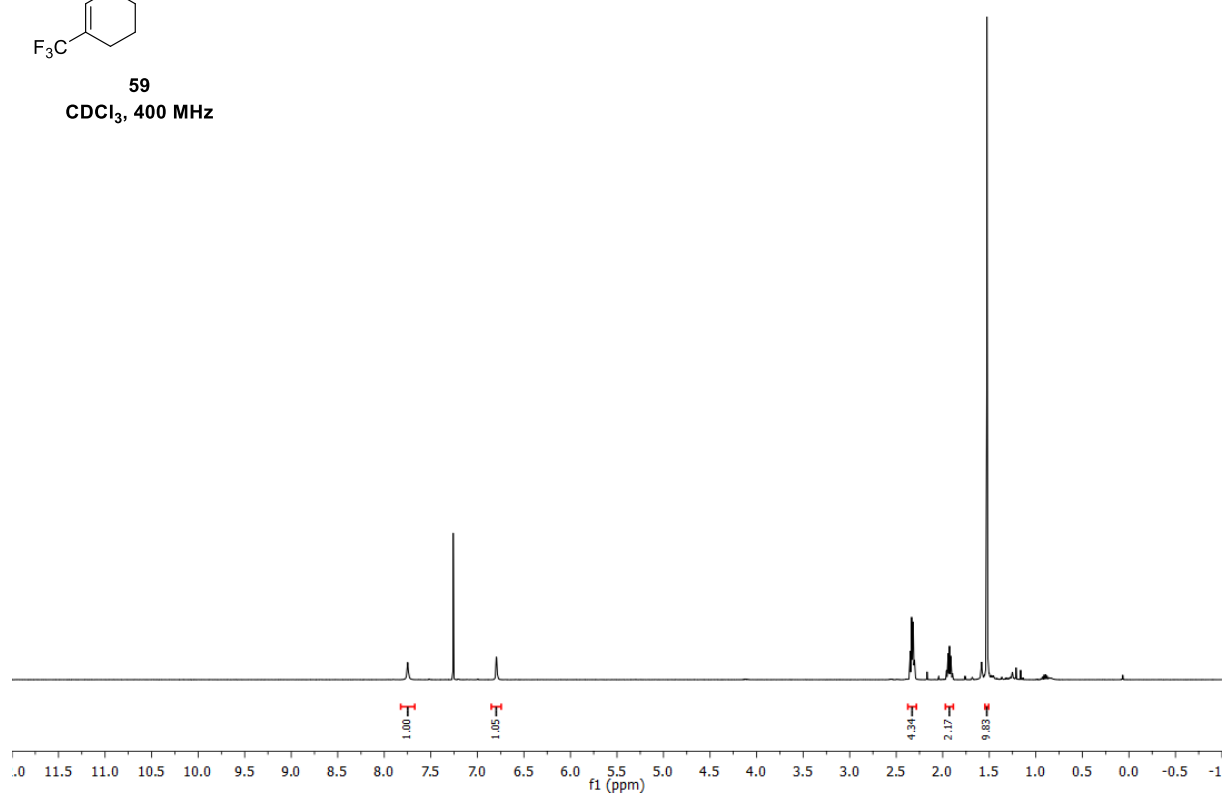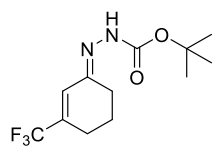

**59**  
CDCl<sub>3</sub>, 100 MHz

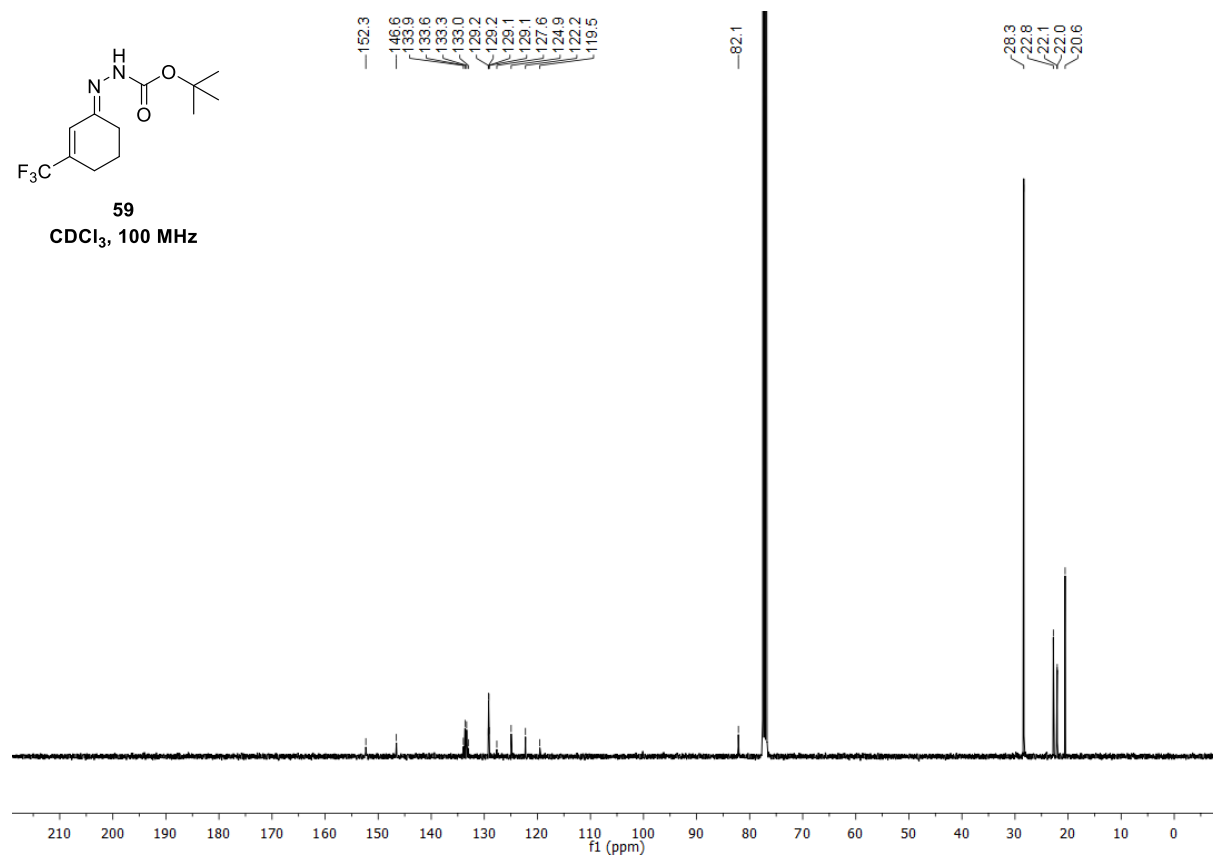

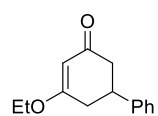

60  
C<sub>6</sub>D<sub>6</sub>, 400 MHz

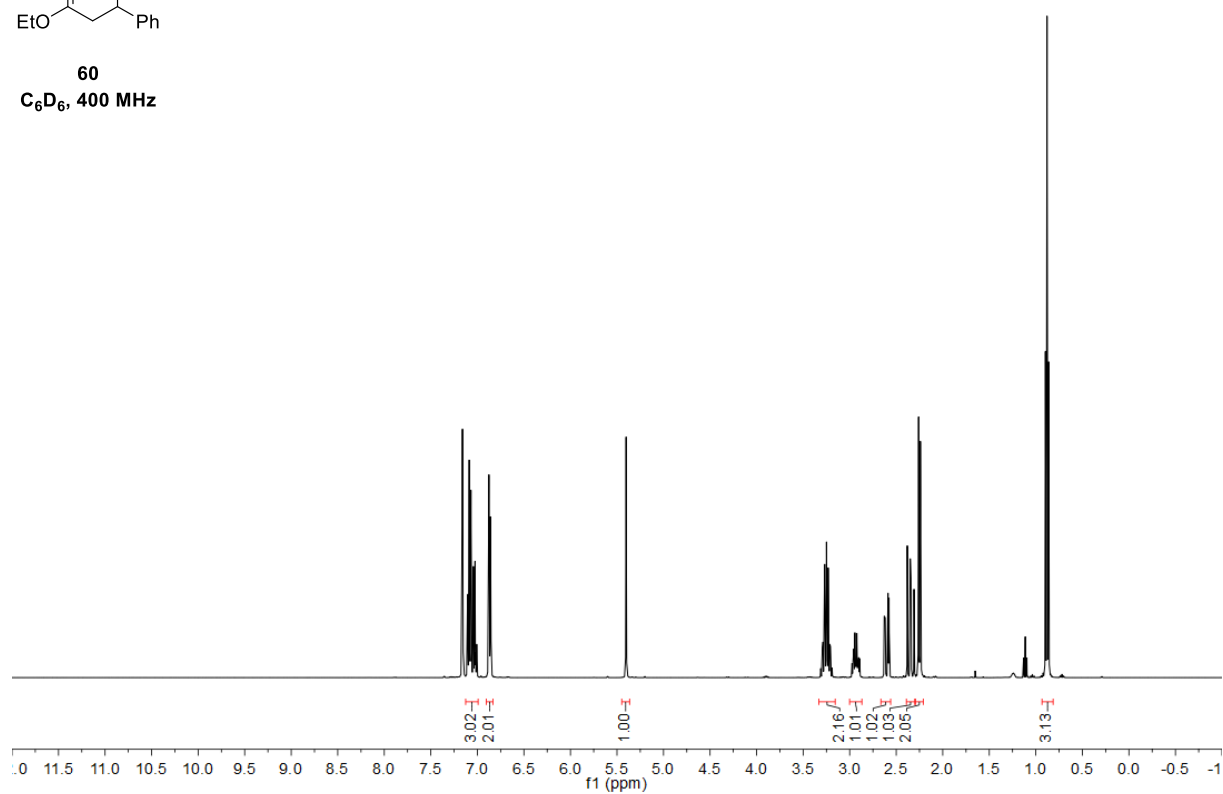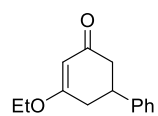

60  
C<sub>6</sub>D<sub>6</sub>, 100 MHz

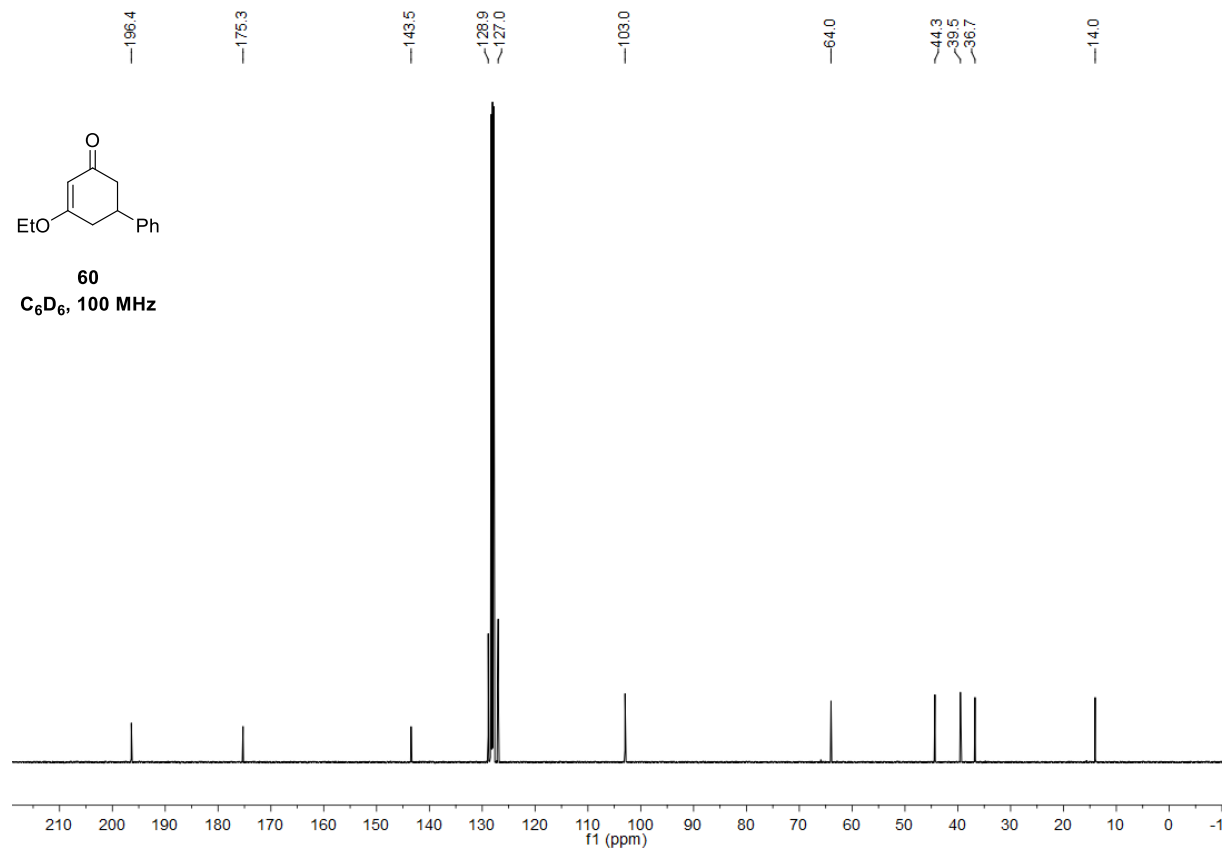

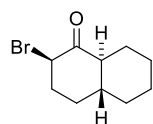

**62**  
CDCl<sub>3</sub>, 400 MHz

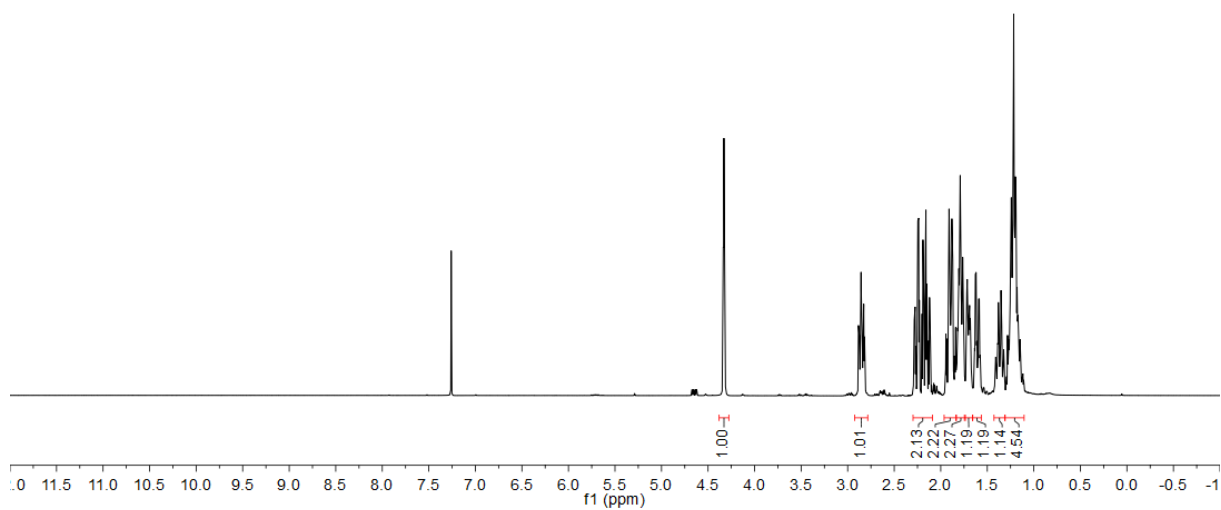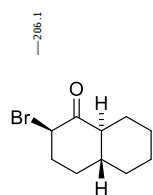

**62**  
CDCl<sub>3</sub>, 100 MHz

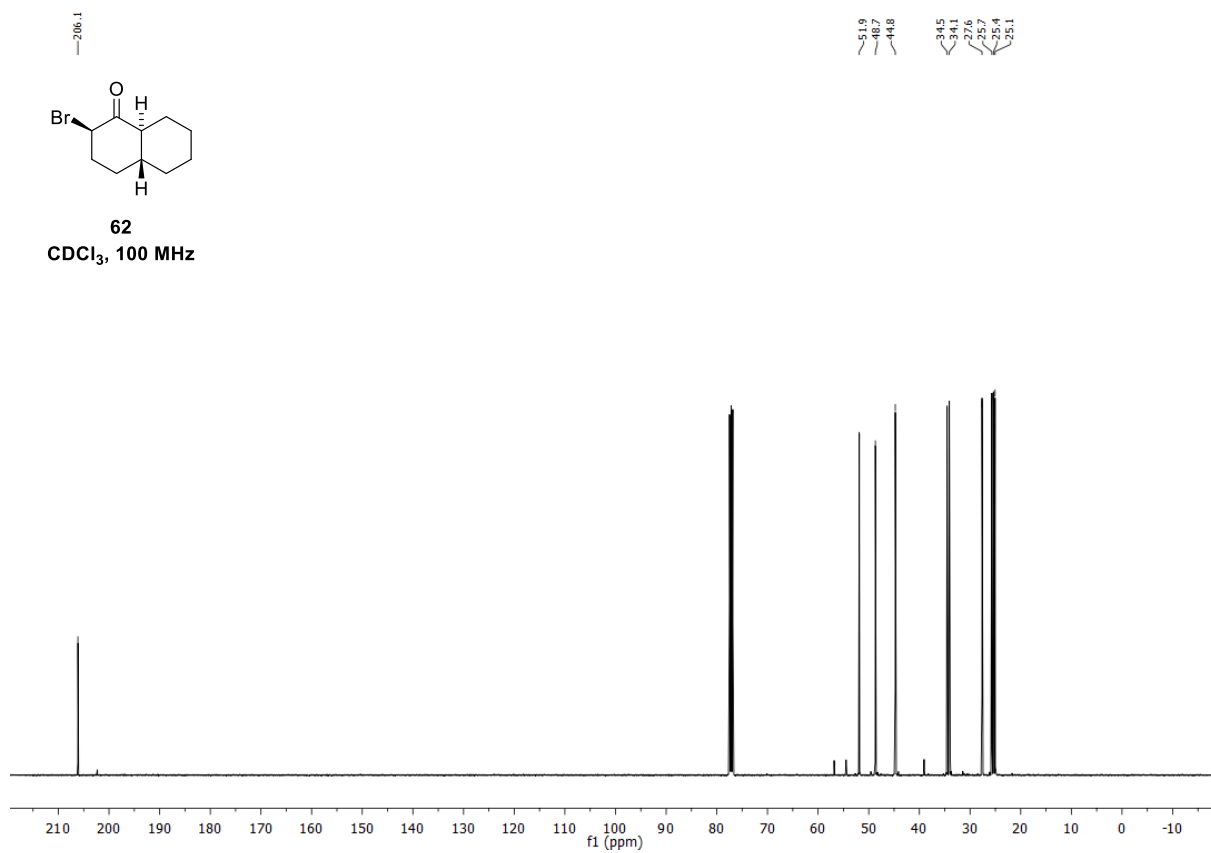



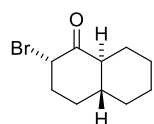

**62**  
CDCl<sub>3</sub>, 400 MHz

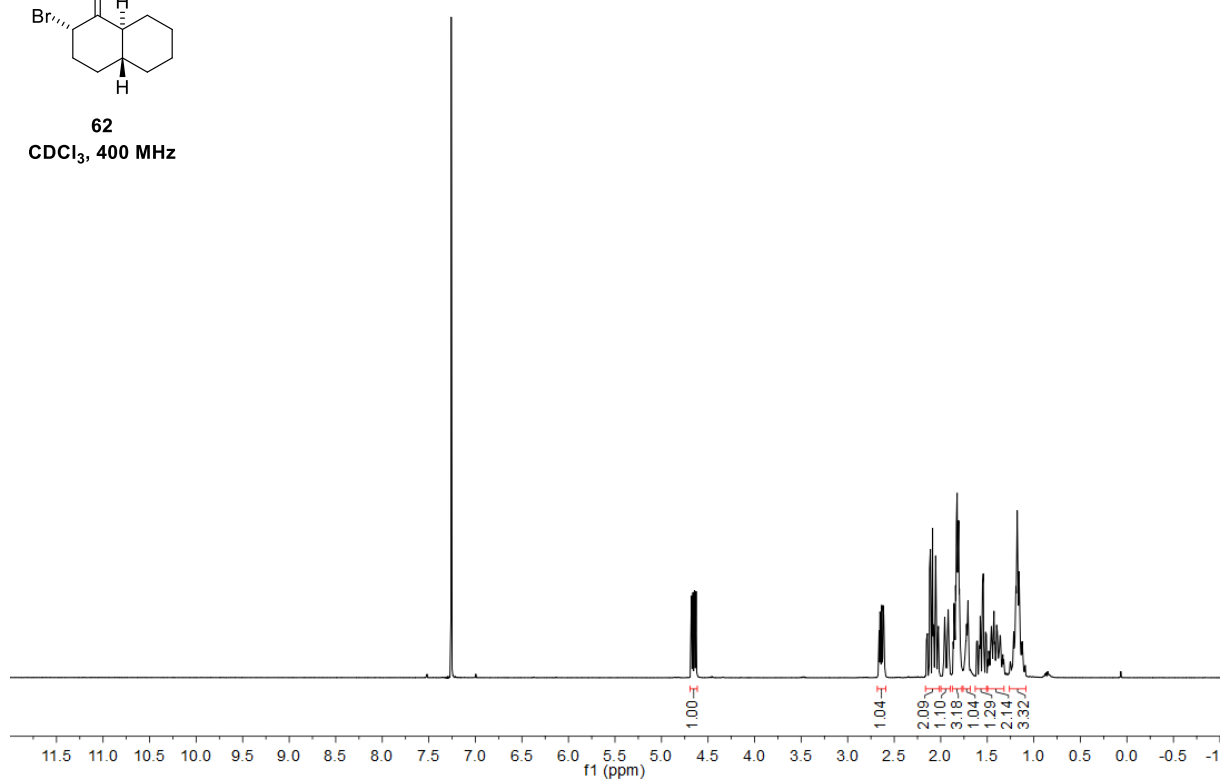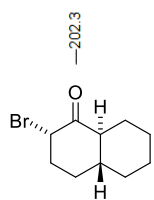

**62**  
CDCl<sub>3</sub>, 100 MHz

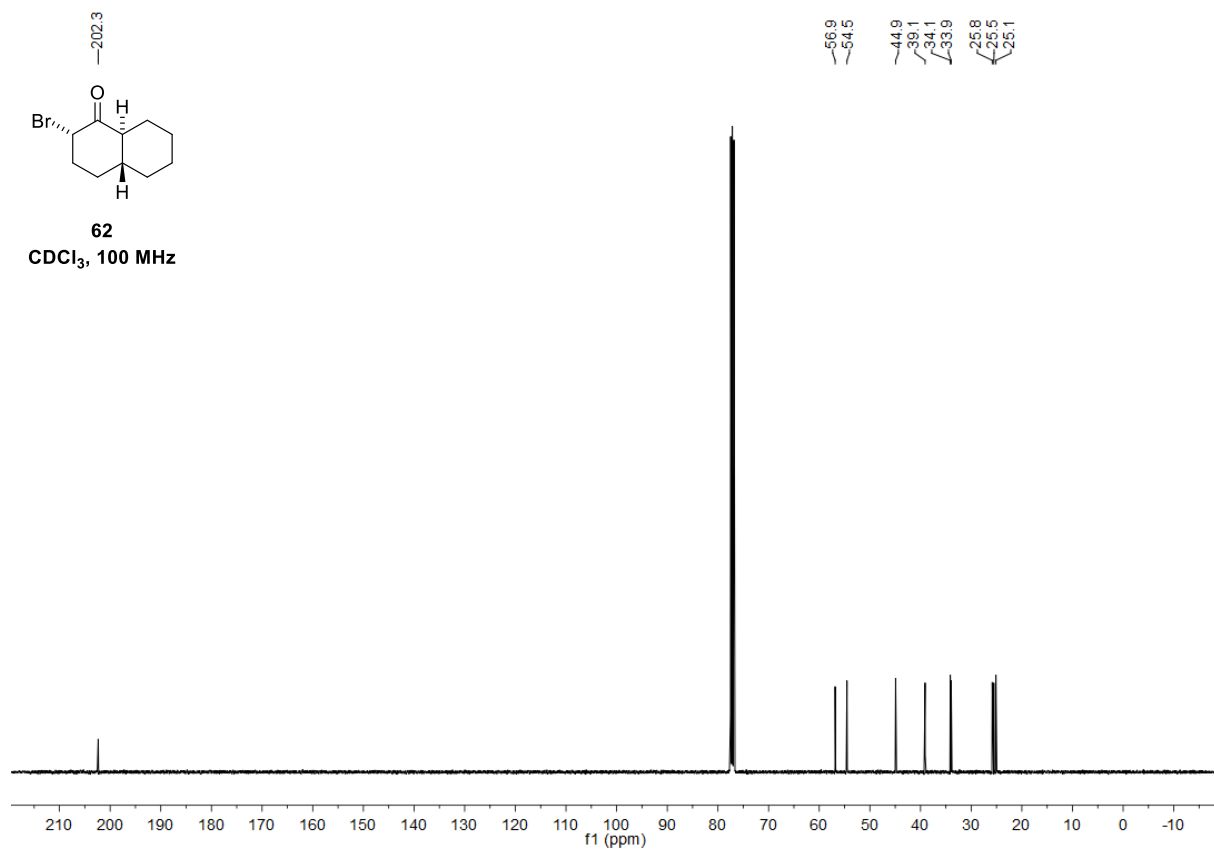

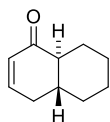

**63**  
CDCl<sub>3</sub>, 400 MHz

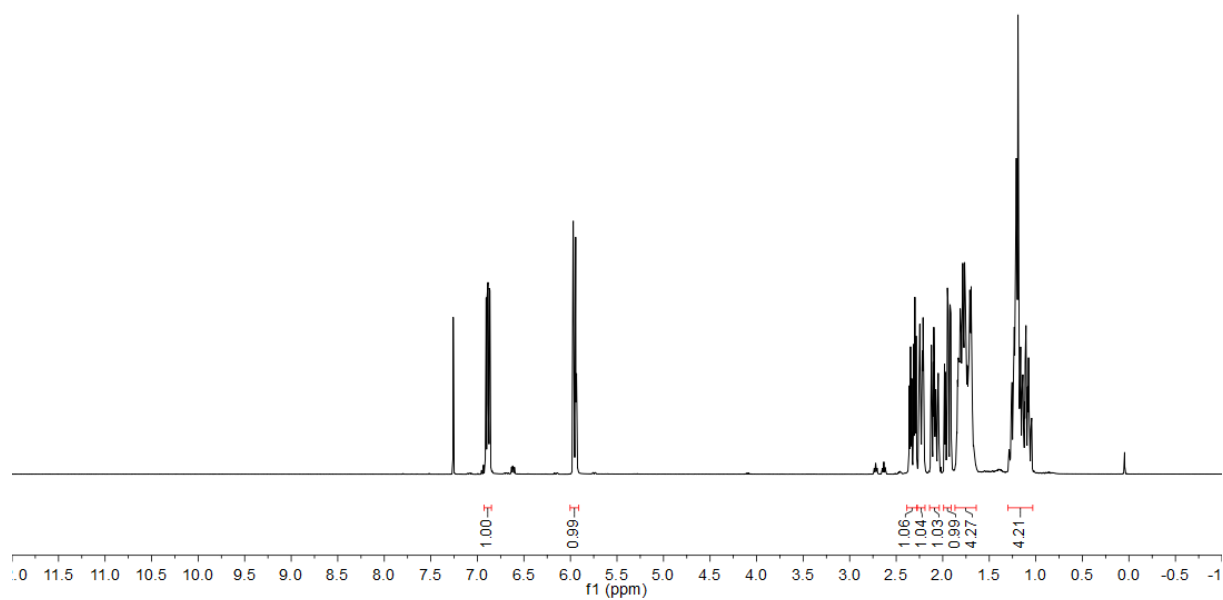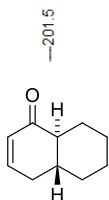

**63**  
CDCl<sub>3</sub>, 100 MHz

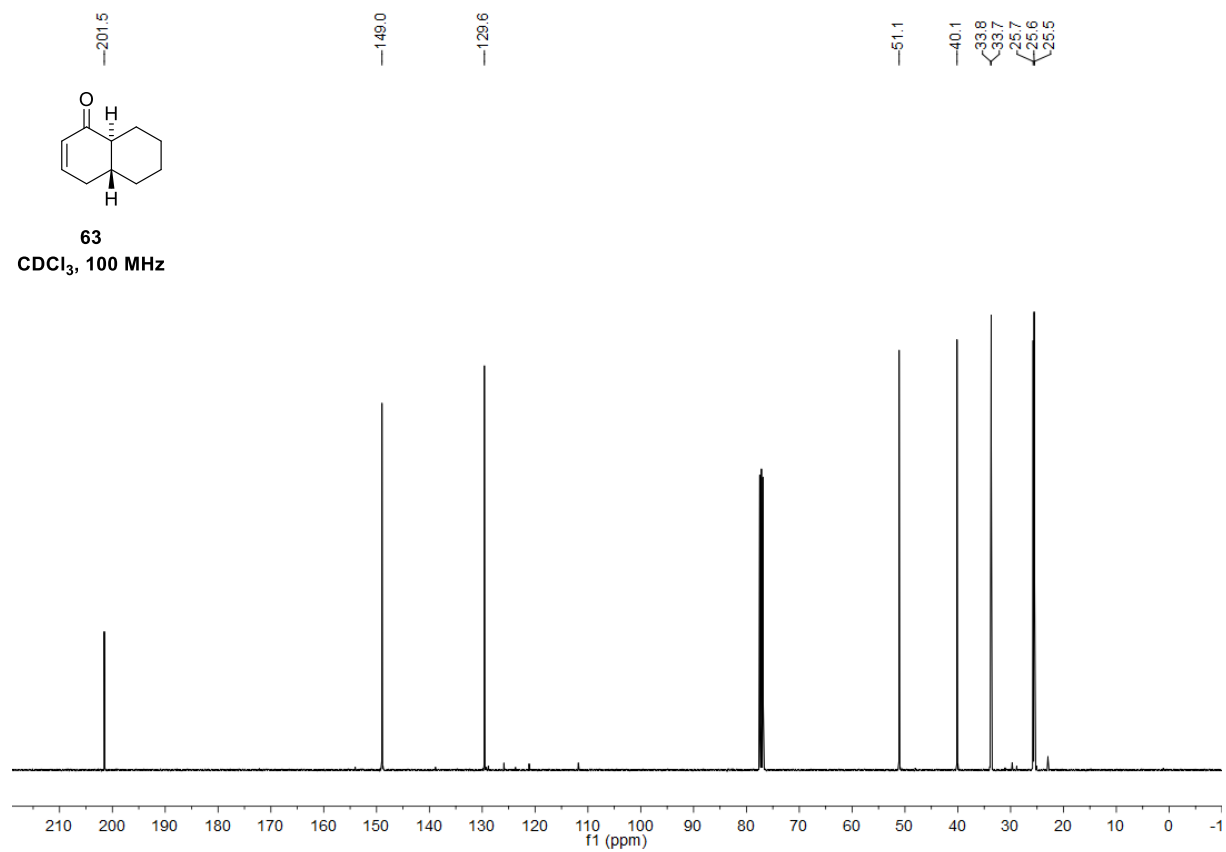

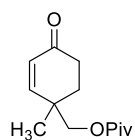

**66**  
CDCl<sub>3</sub>, 400 MHz

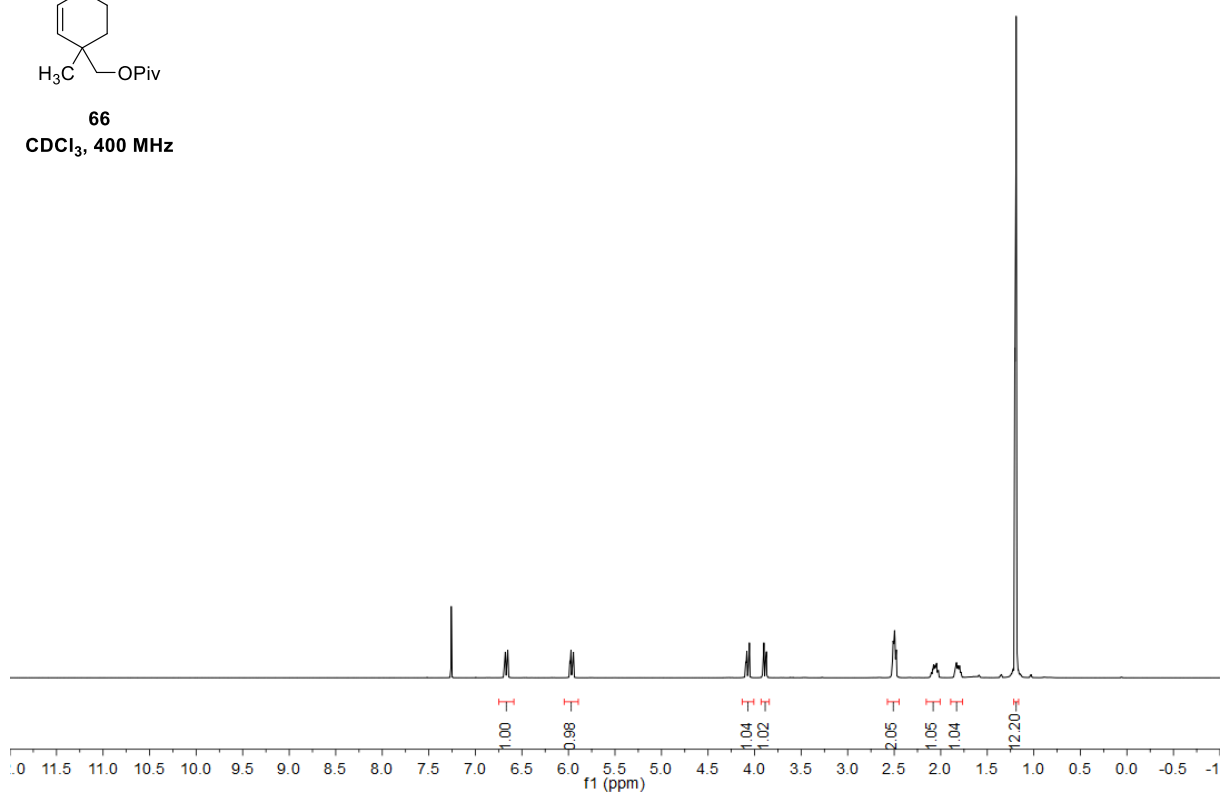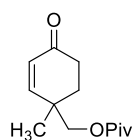

**66**  
CDCl<sub>3</sub>, 100 MHz

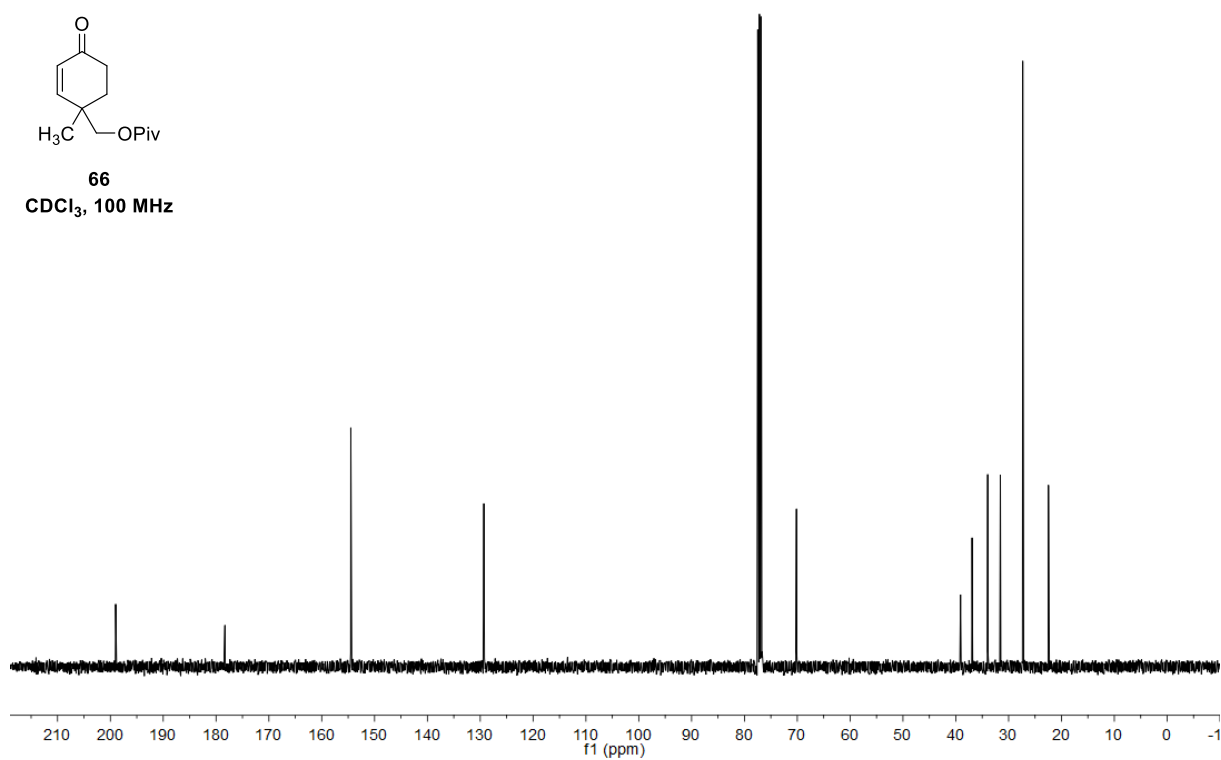

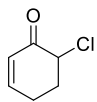

**67**  
CDCl<sub>3</sub>, 600 MHz

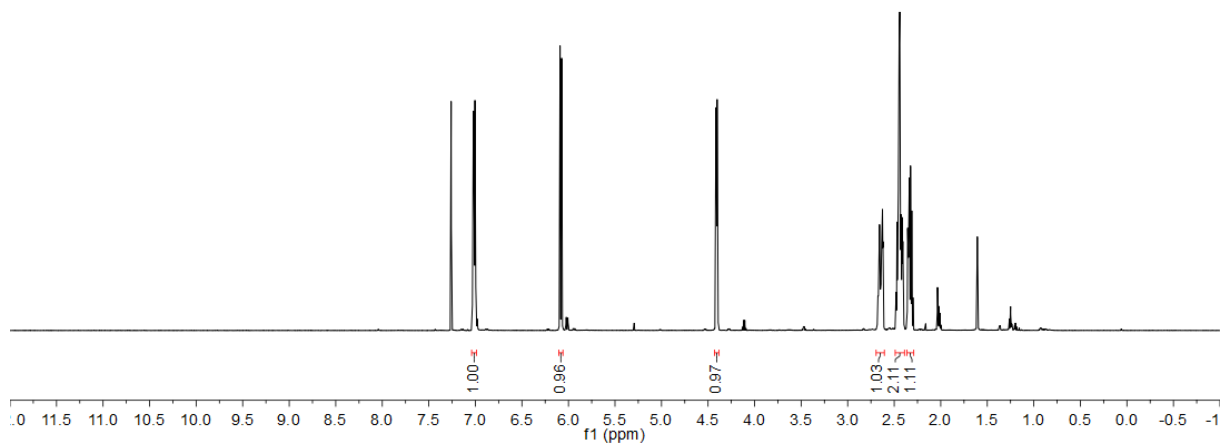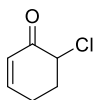

**67**  
CDCl<sub>3</sub>, 150 MHz

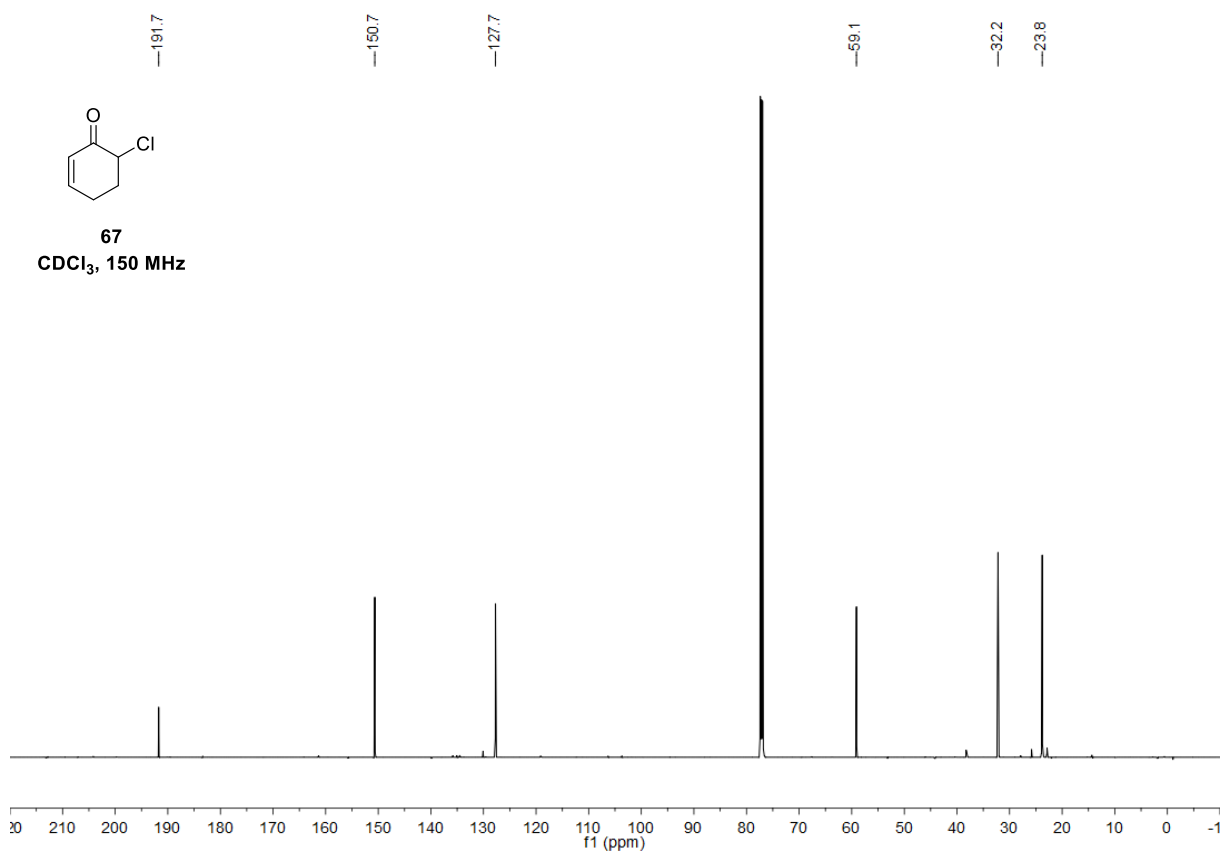

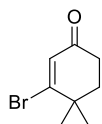

**31a**  
CDCl<sub>3</sub>, 400 MHz

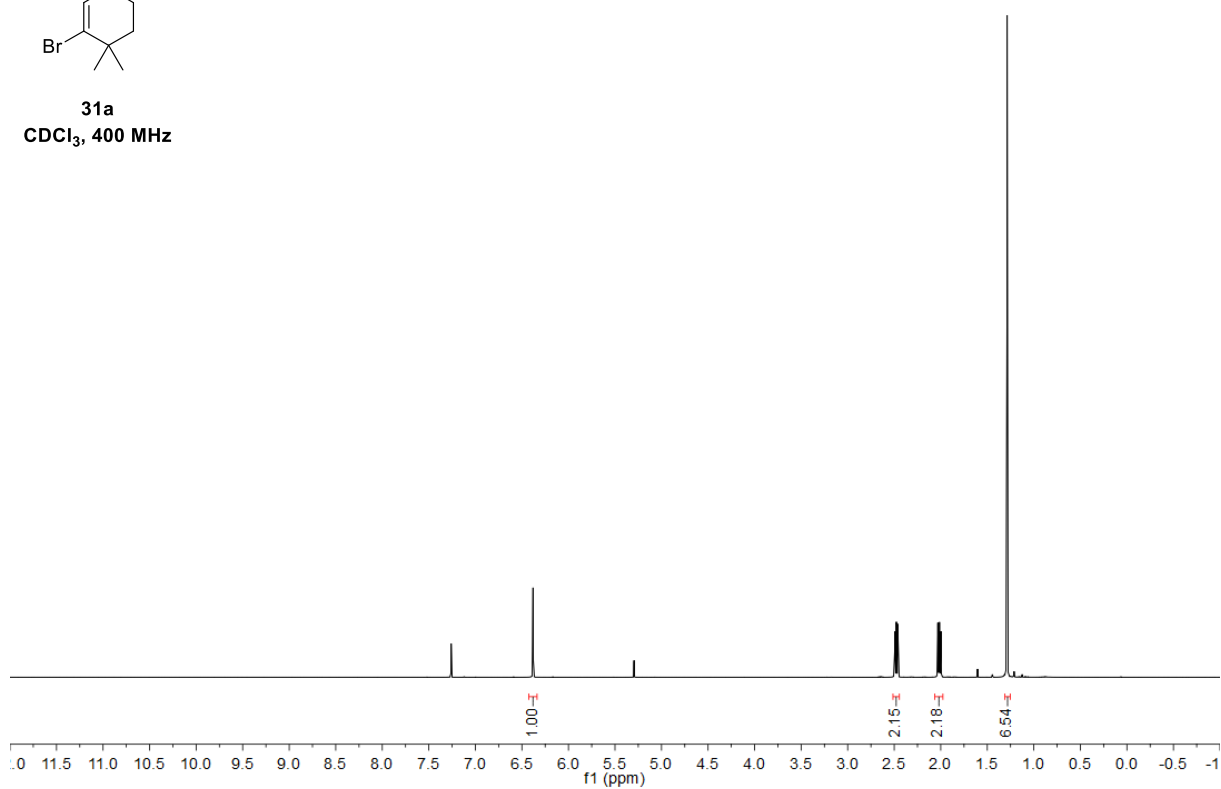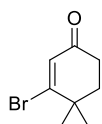

**31a**  
CDCl<sub>3</sub>, 100 MHz

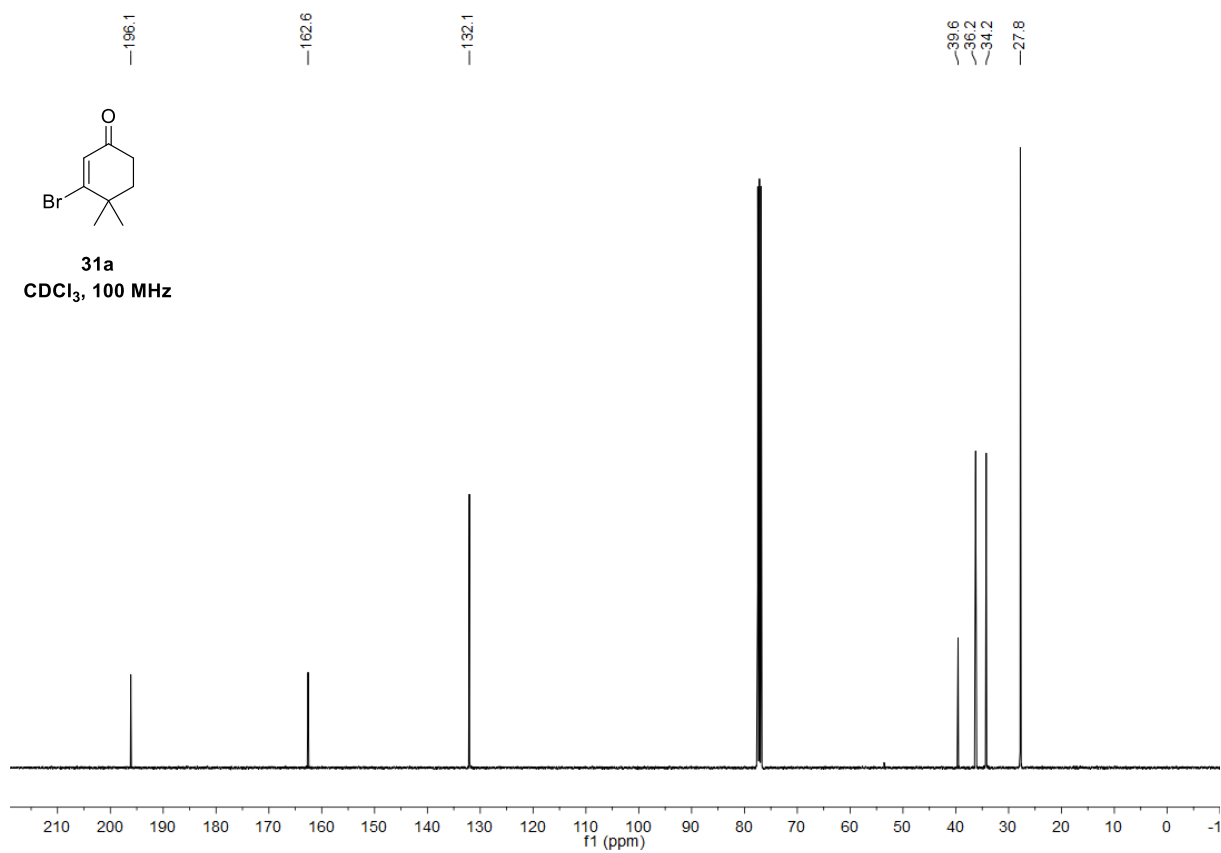

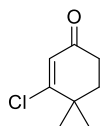

**31b**  
CDCl<sub>3</sub>, 400 MHz

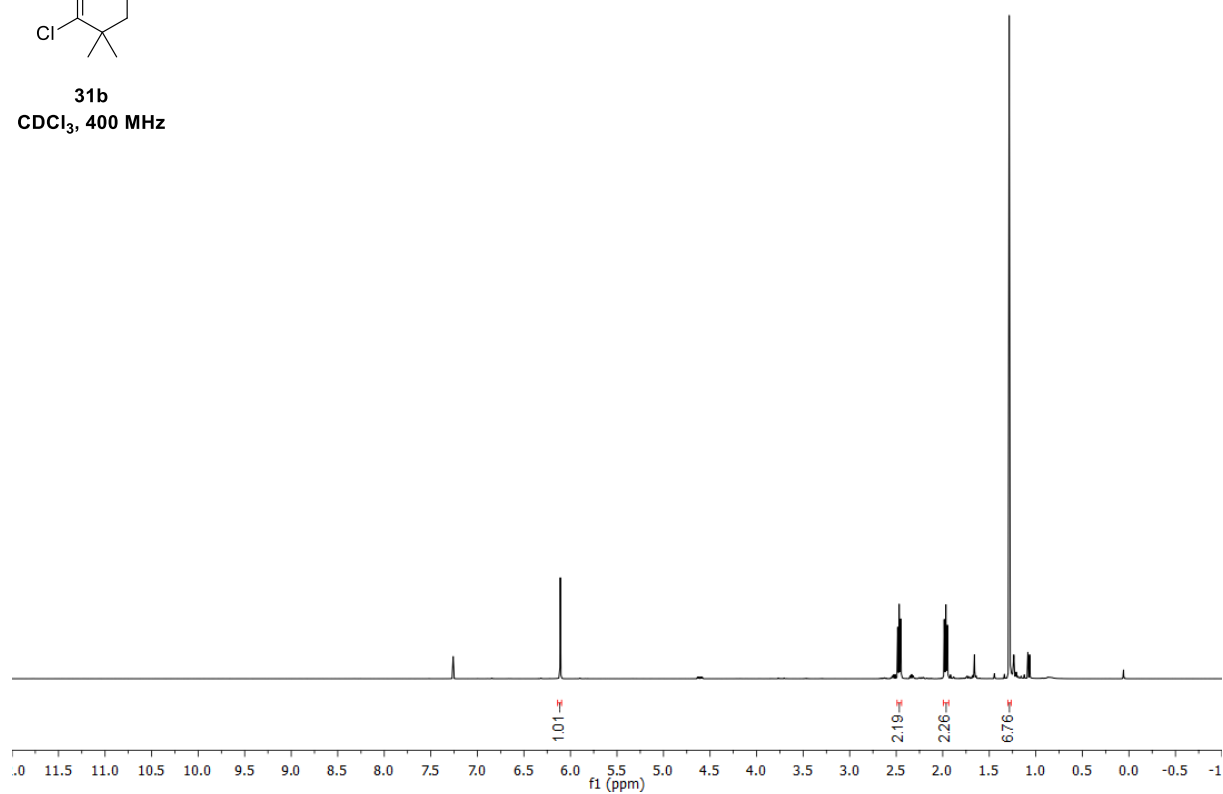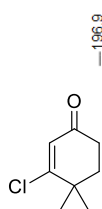

**31b**  
CDCl<sub>3</sub>, 100 MHz

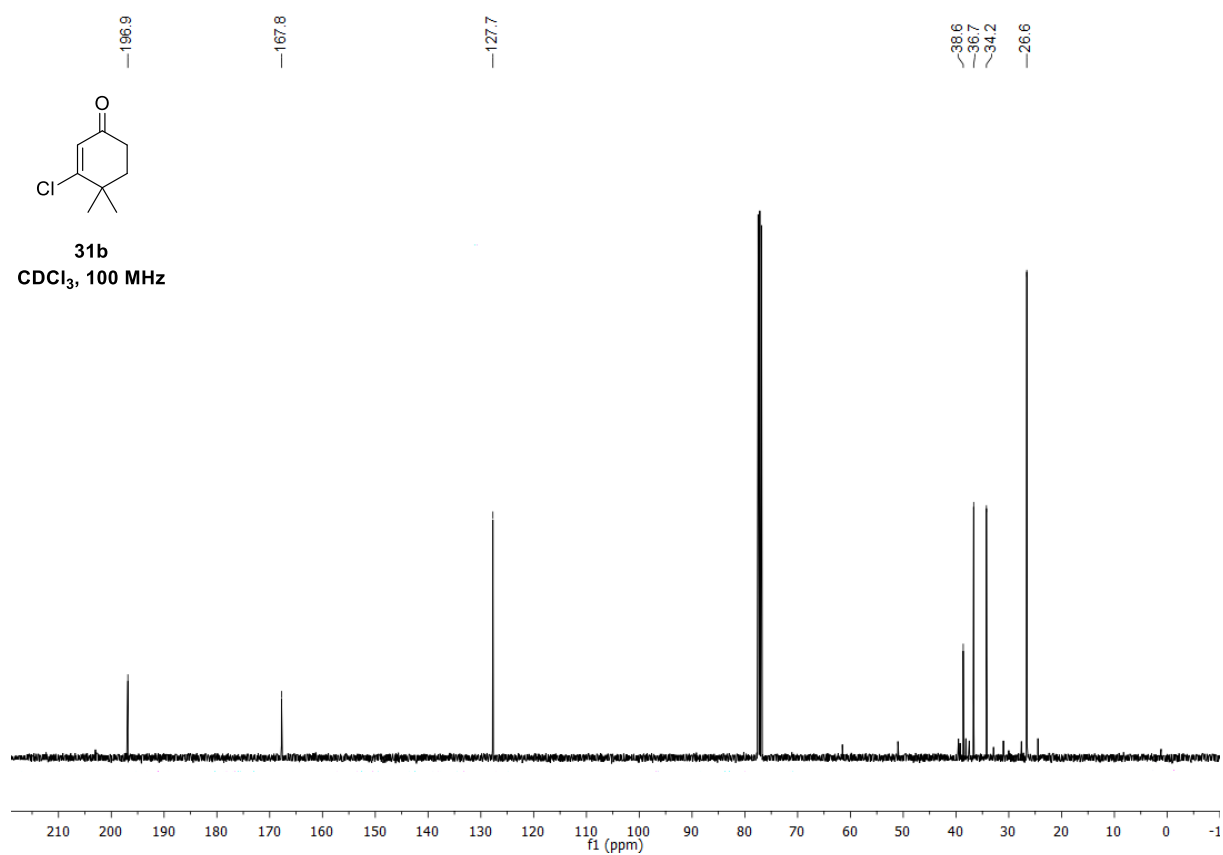

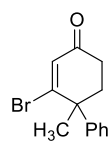

**32a**  
CDCl<sub>3</sub>, 400 MHz

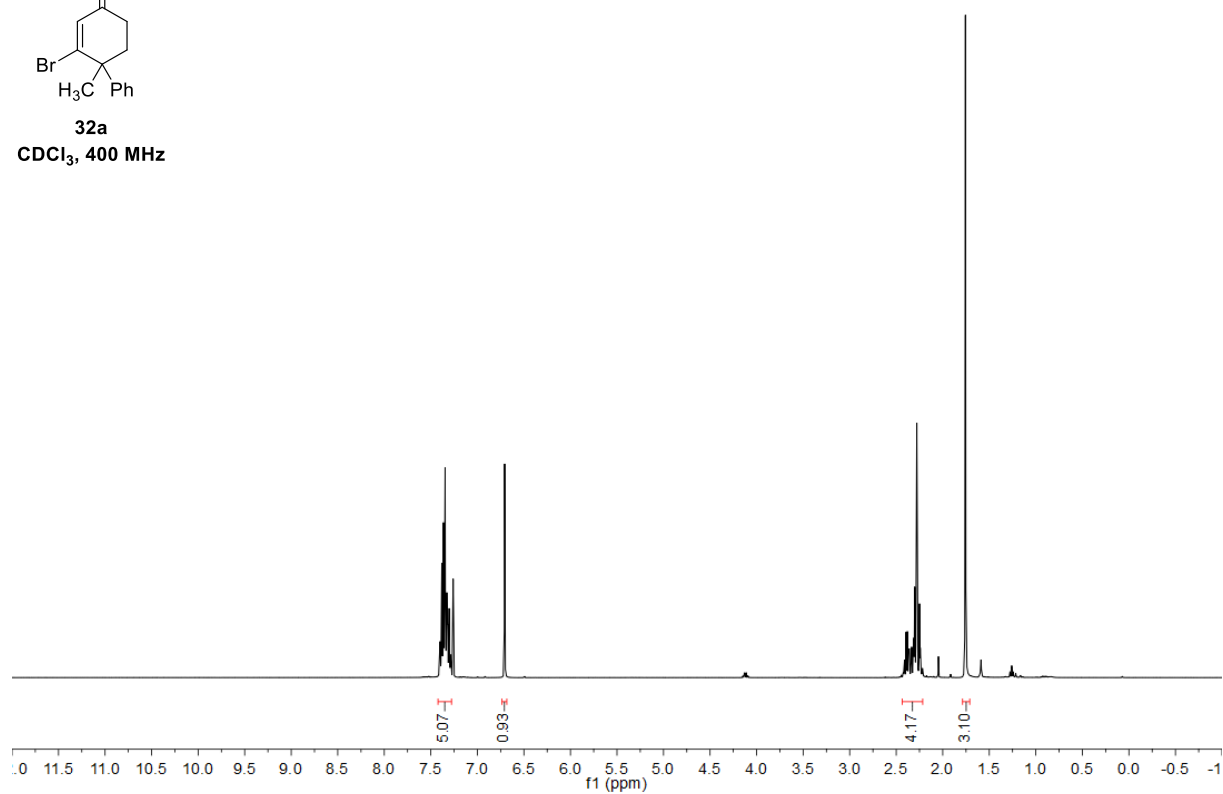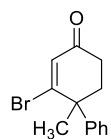

**32a**  
CDCl<sub>3</sub>, 100 MHz

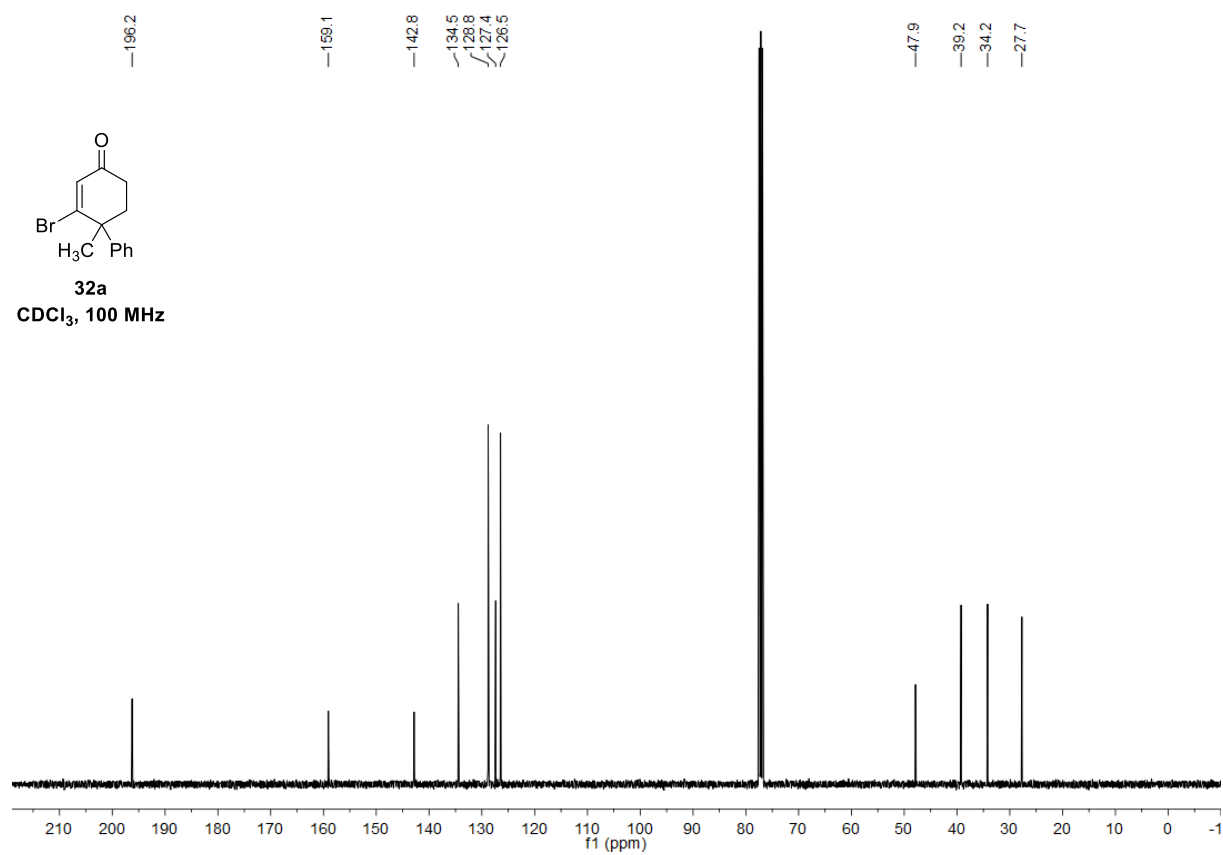

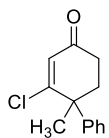

**32b**  
CD<sub>2</sub>Cl<sub>2</sub>, 400 MHz

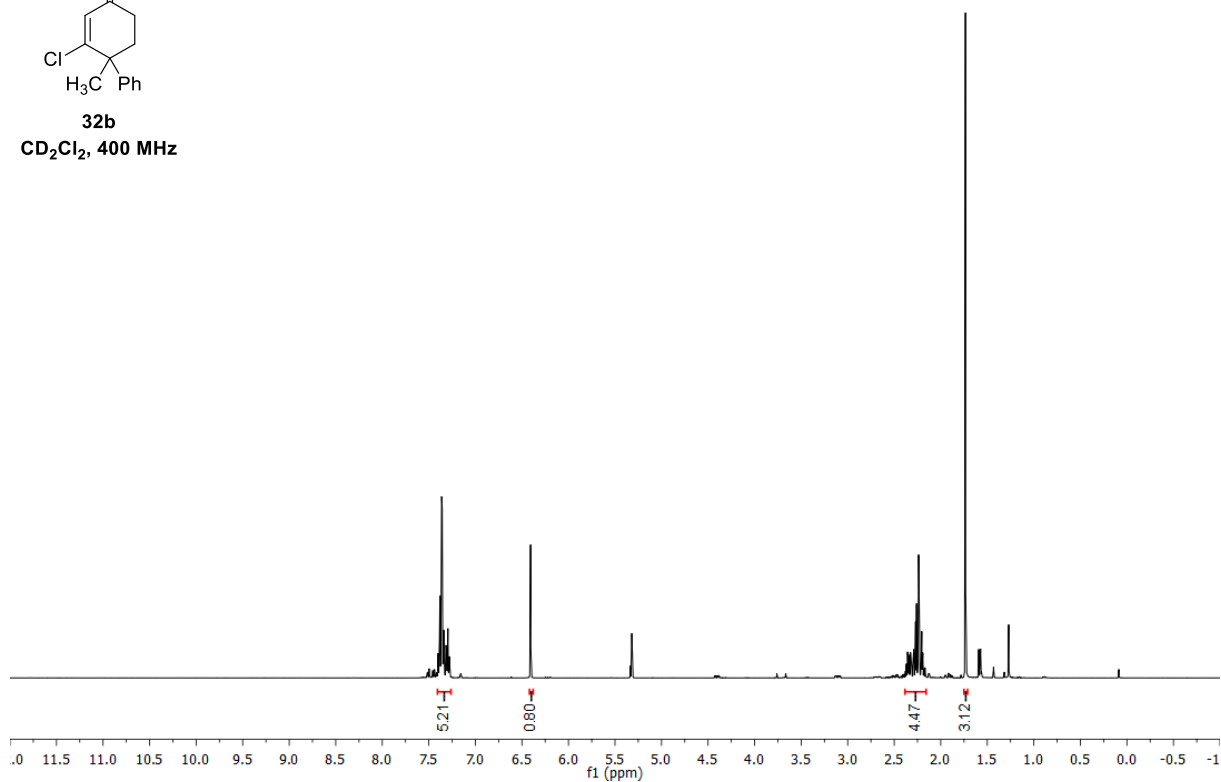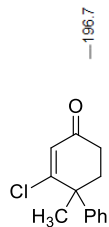

**32b**  
CD<sub>2</sub>Cl<sub>2</sub>, 100 MHz

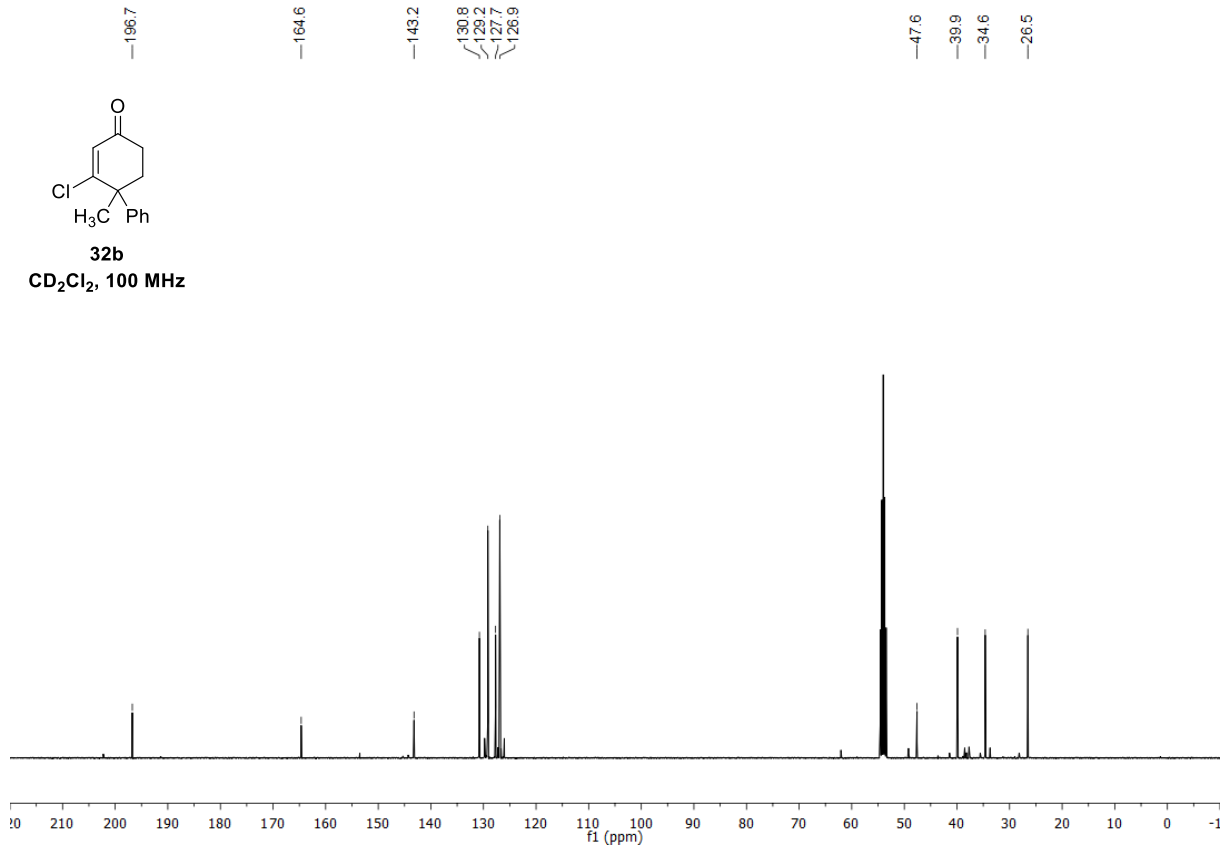



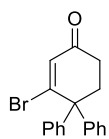

**33a**  
CD<sub>2</sub>Cl<sub>2</sub>, 400 MHz

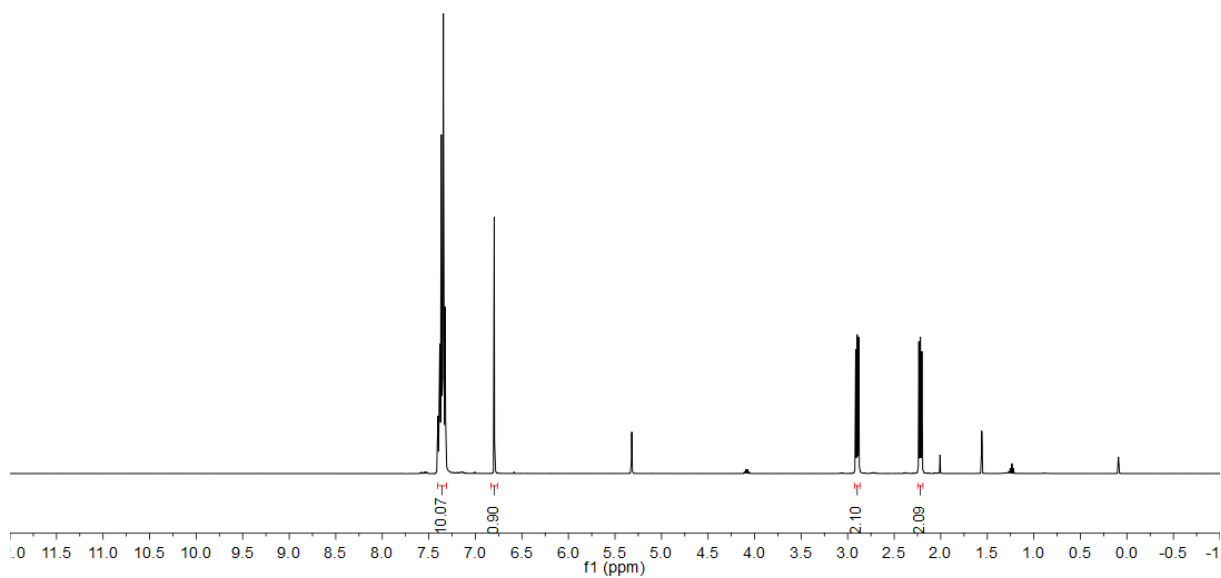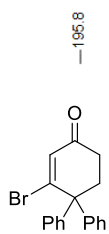

**33a**  
CD<sub>2</sub>Cl<sub>2</sub>, 100 MHz

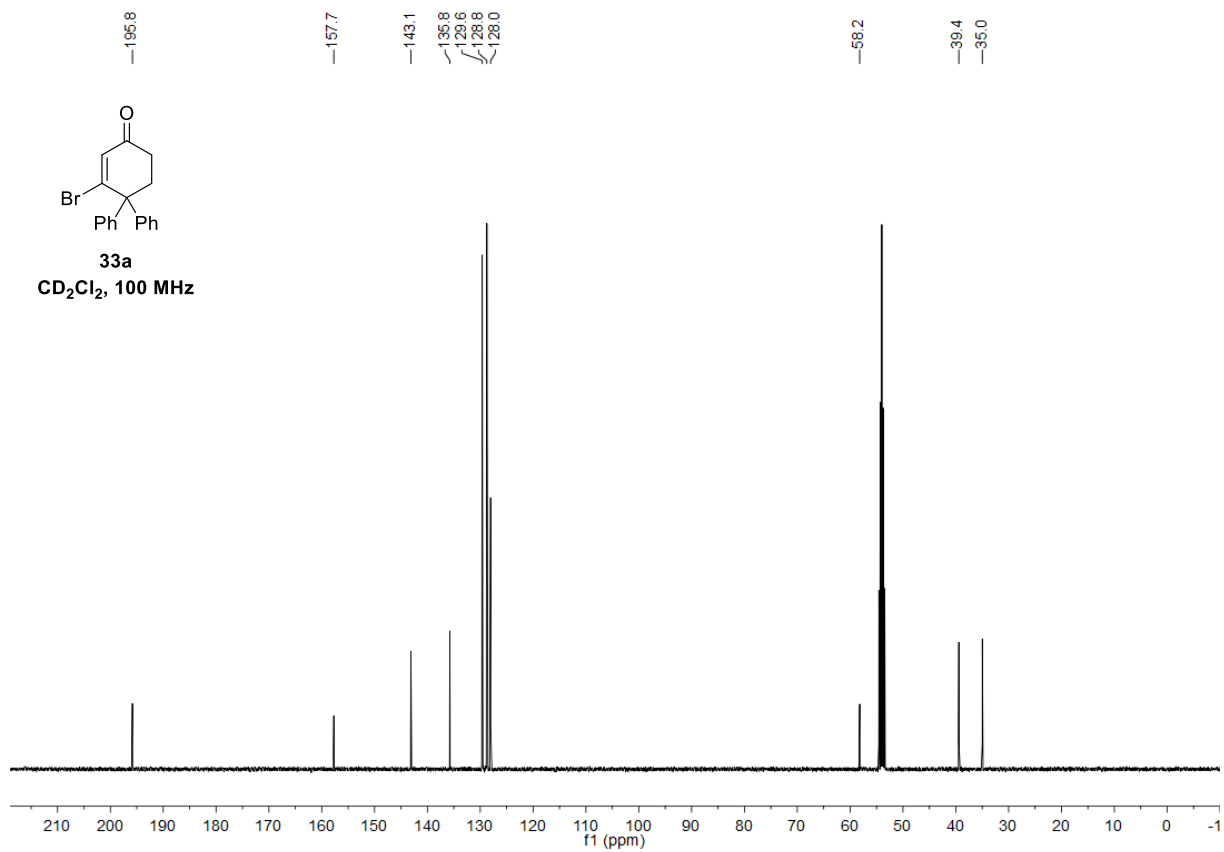

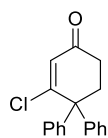

**33b**  
CD<sub>2</sub>Cl<sub>2</sub>, 400 MHz

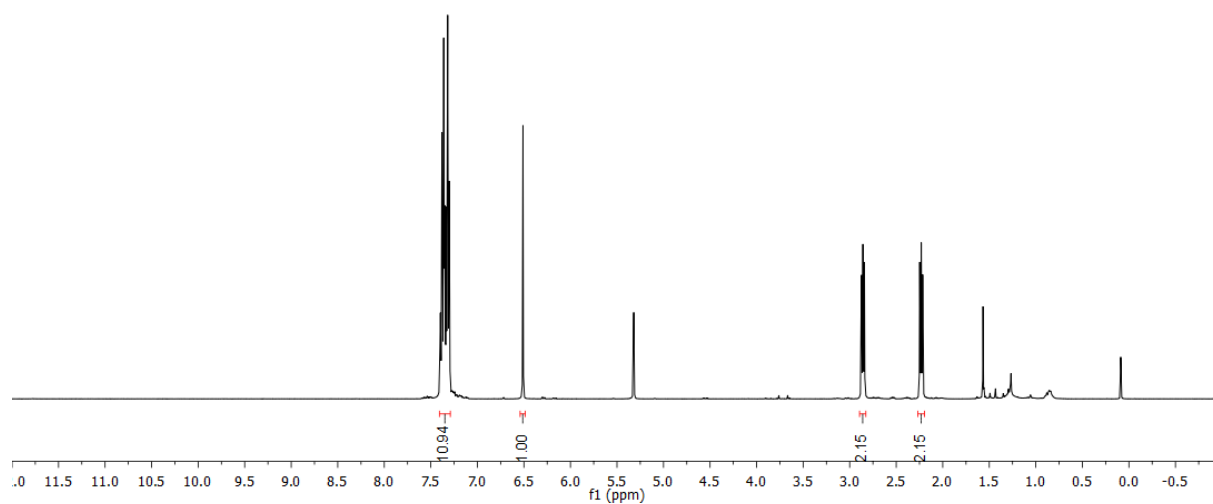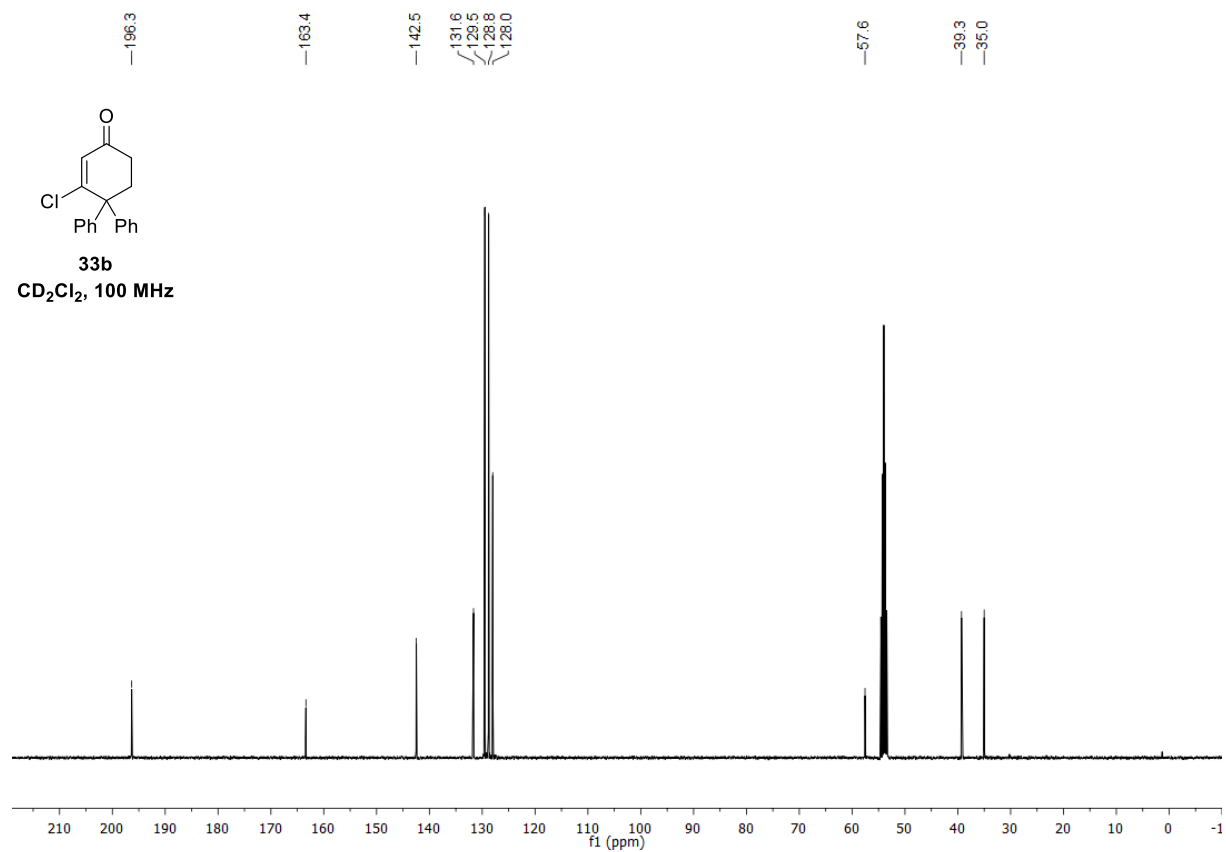

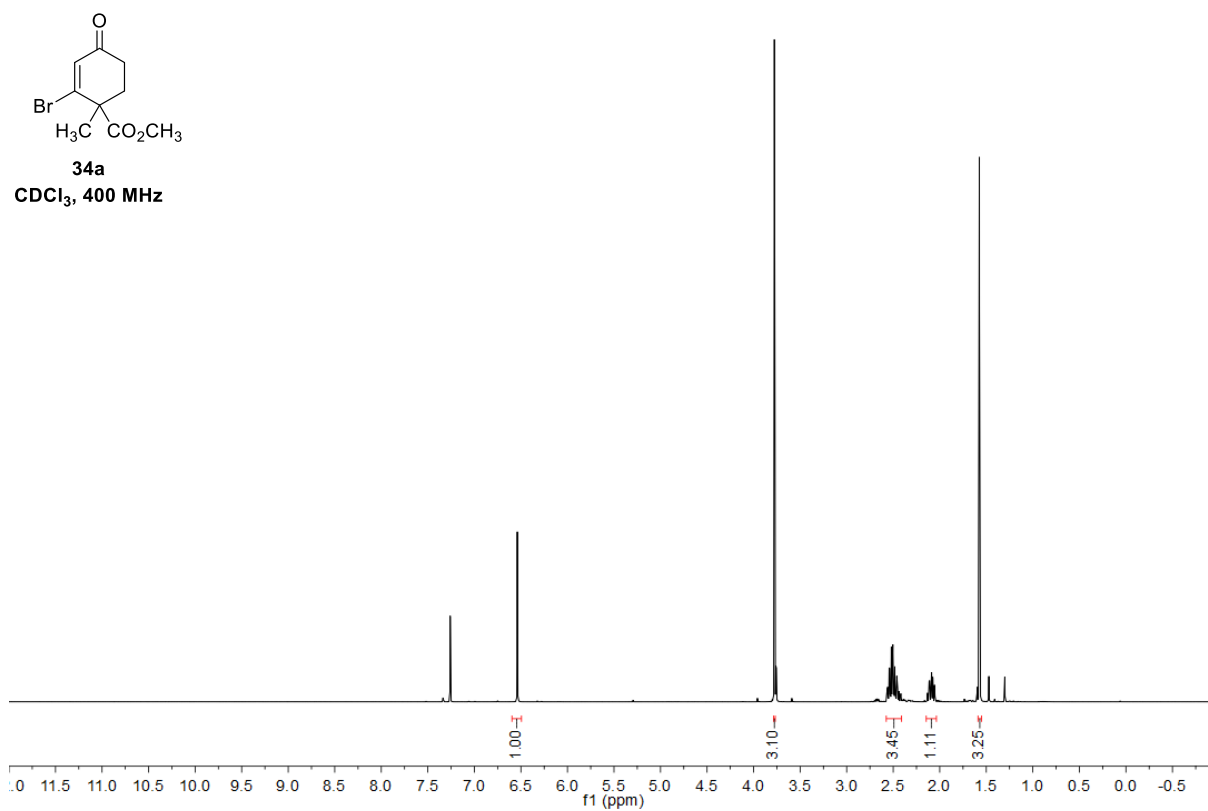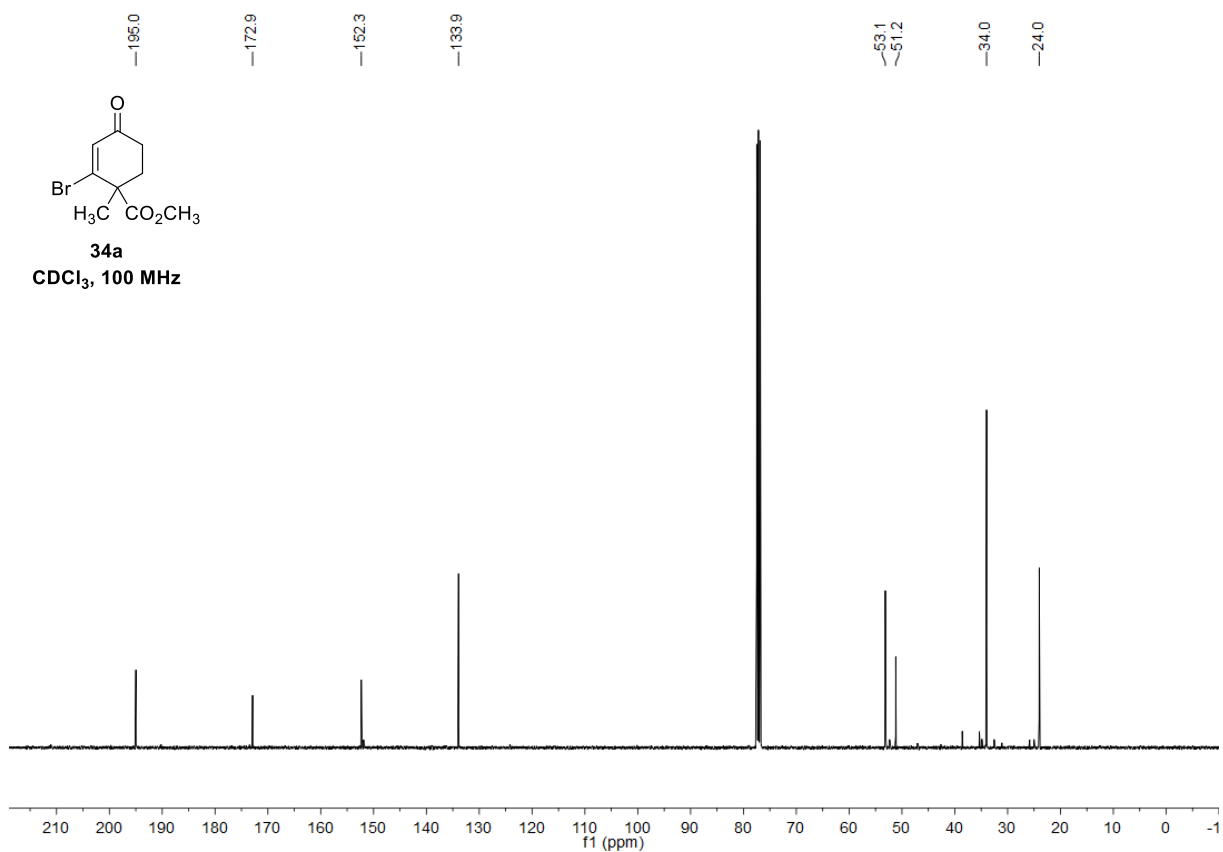

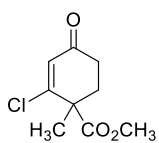

**34b**  
CDCl<sub>3</sub>, 400 MHz

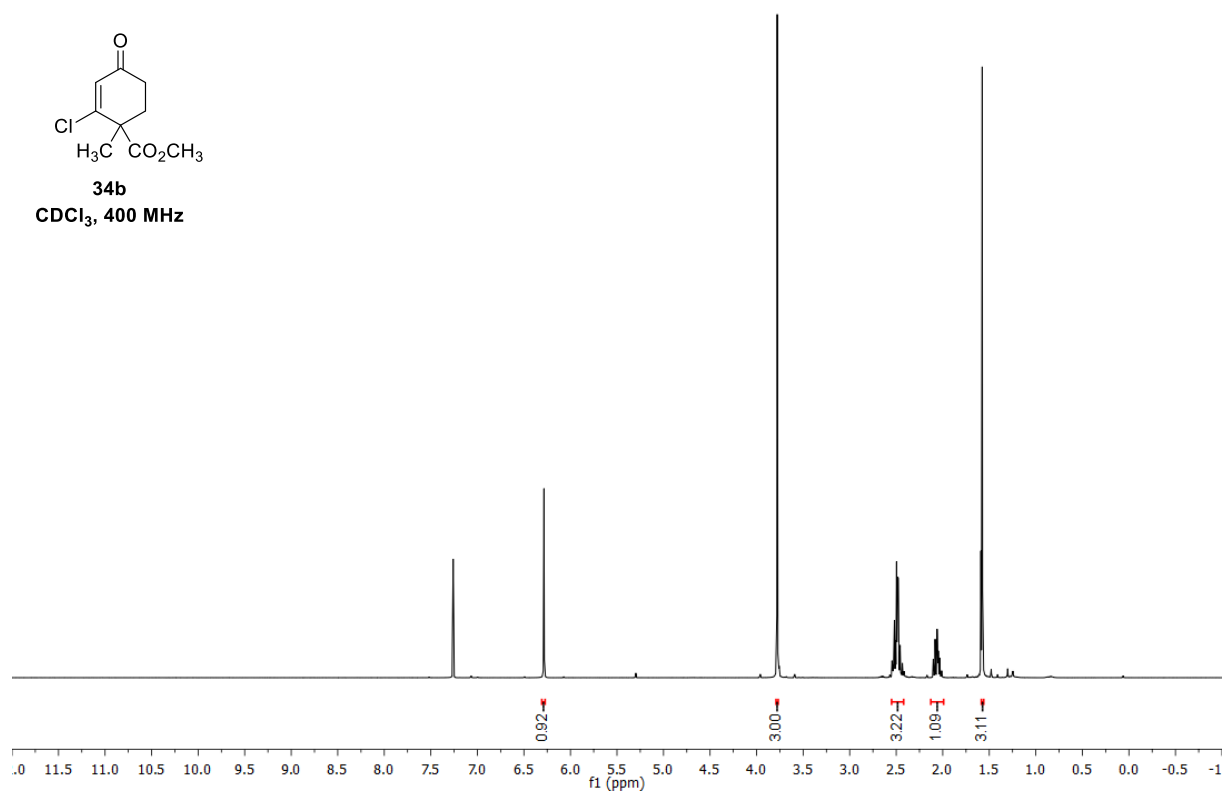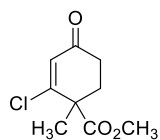

**34b**  
CDCl<sub>3</sub>, 100 MHz

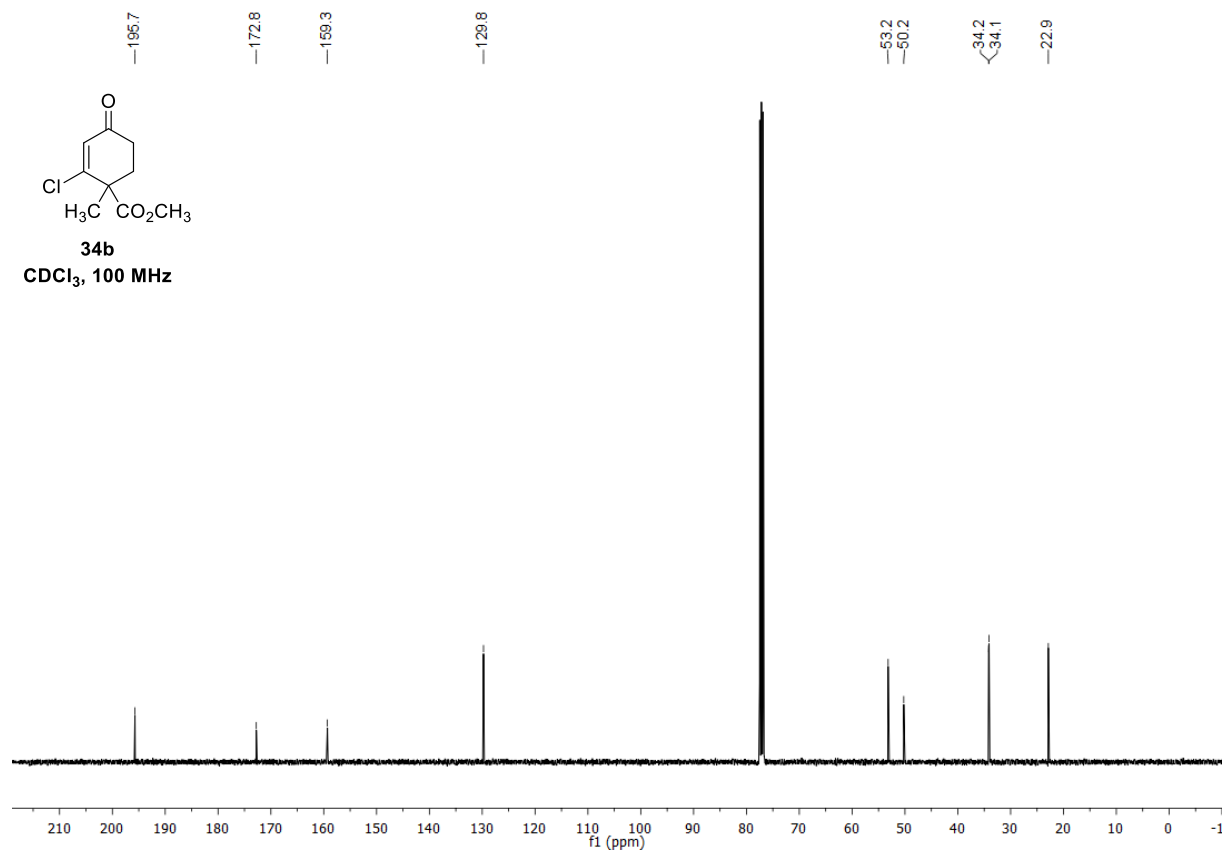

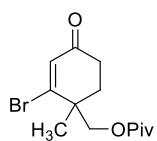

**35a**  
CDCl<sub>3</sub>, 400 MHz

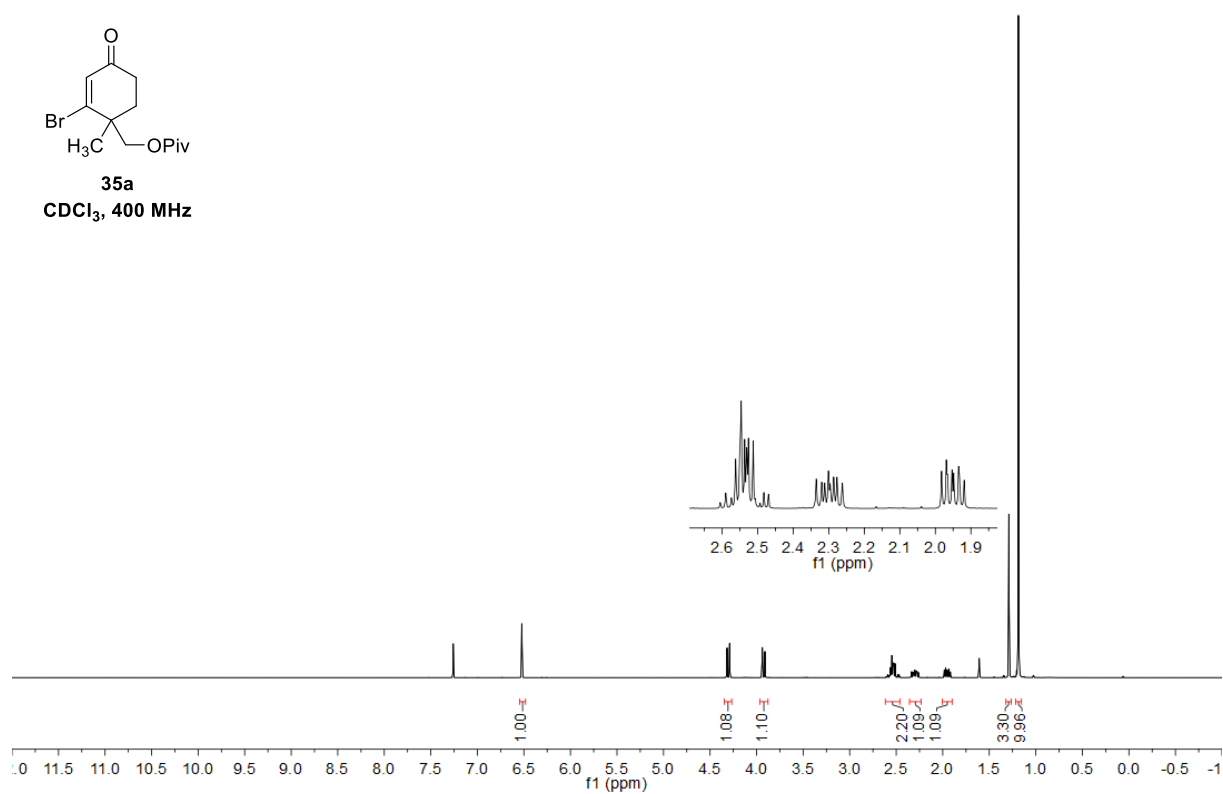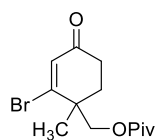

**35a**  
CDCl<sub>3</sub>, 100 MHz

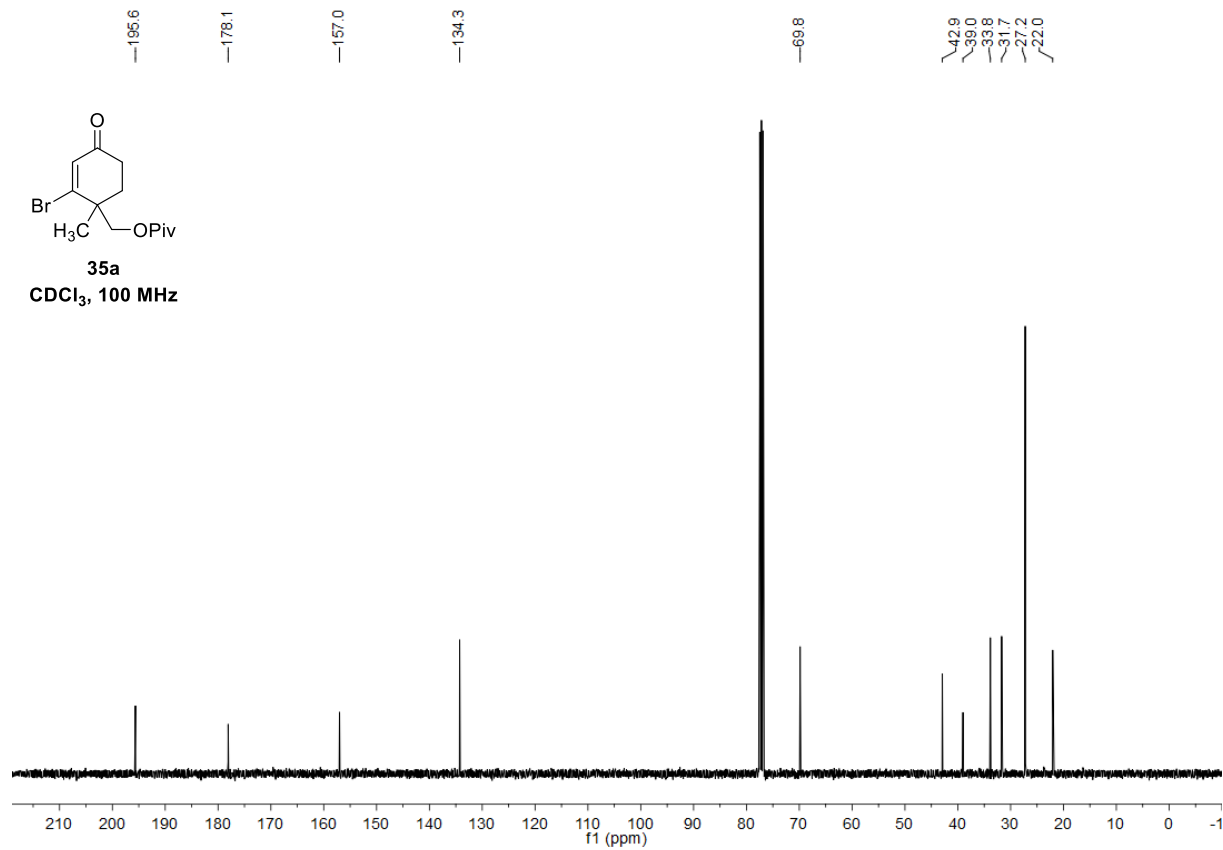

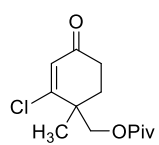

**35b**  
CDCl<sub>3</sub>, 400 MHz

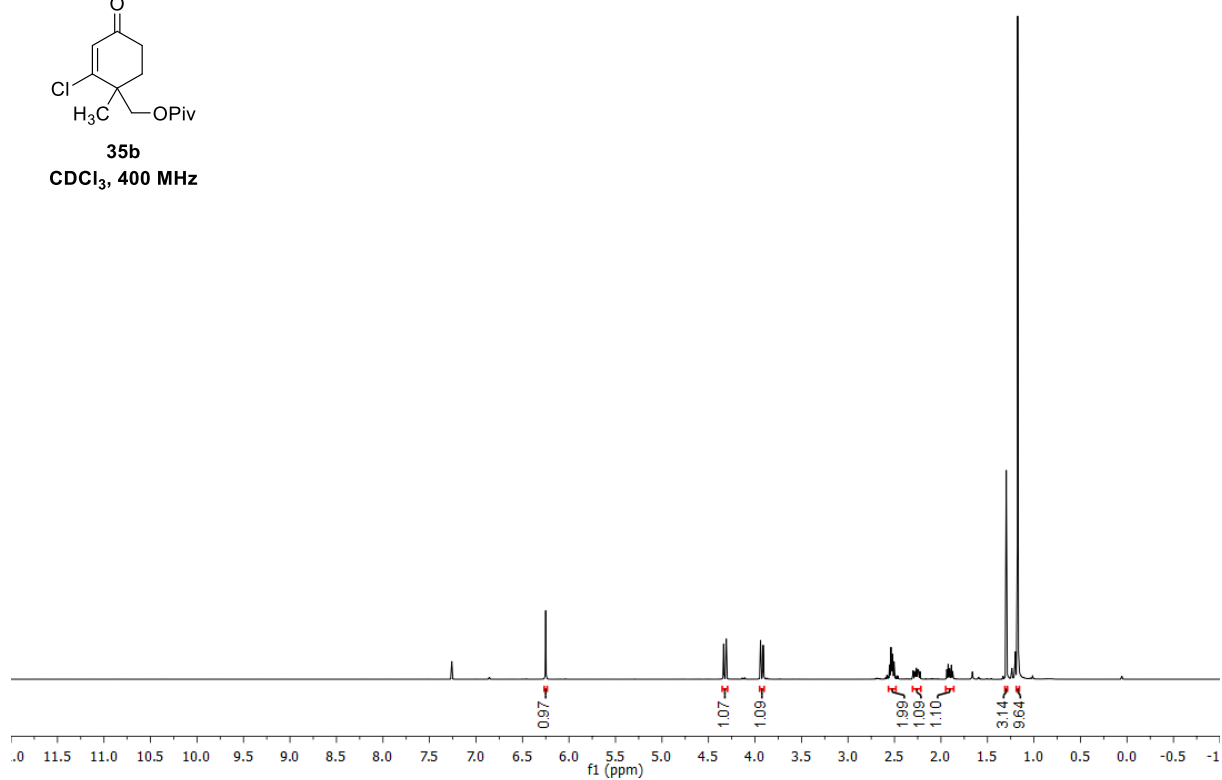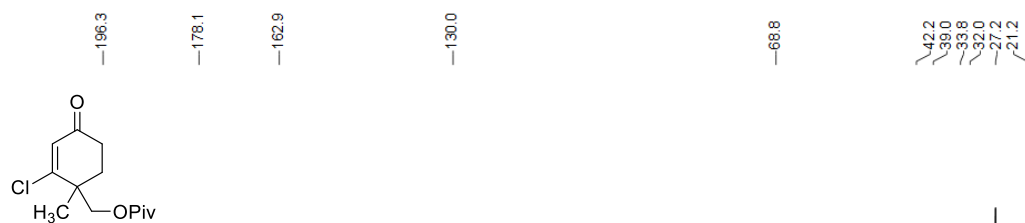

**35b**  
CDCl<sub>3</sub>, 100 MHz

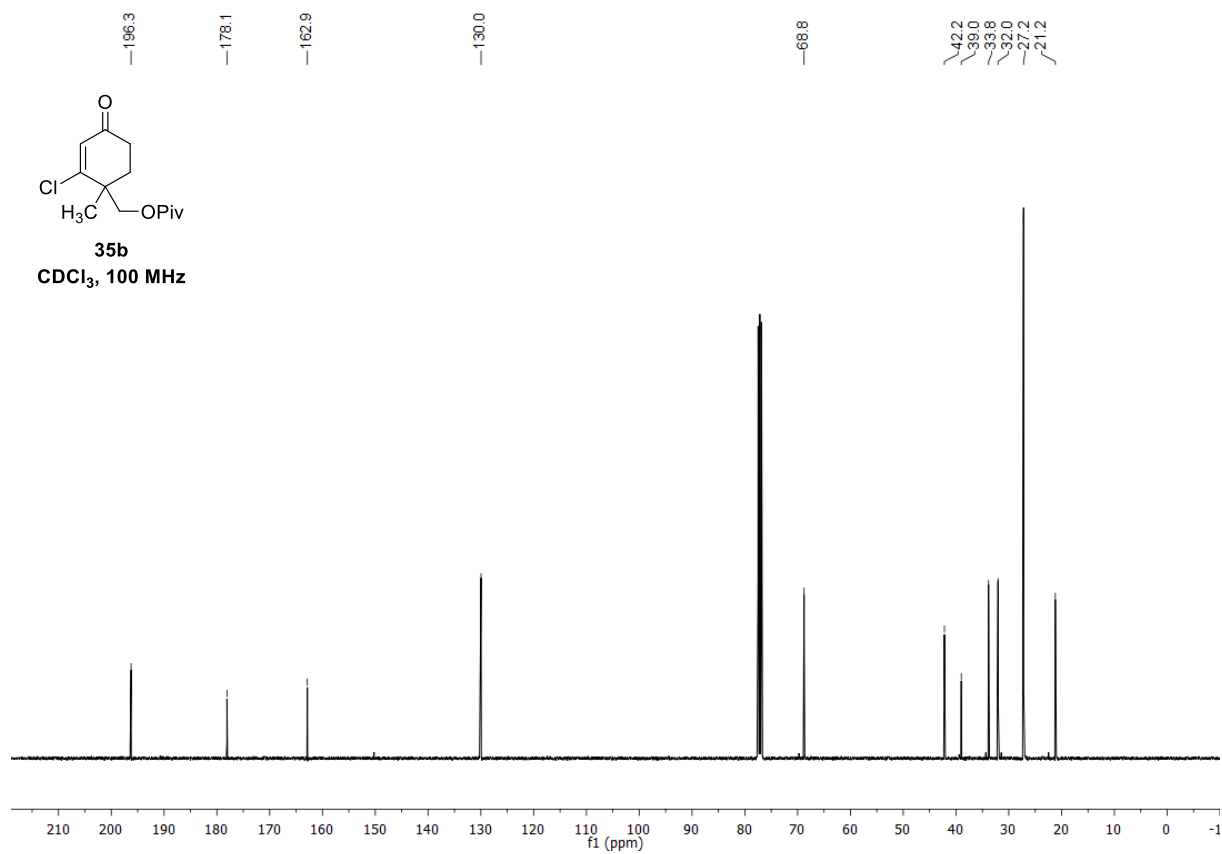

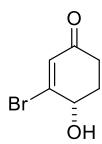

36

CDCl<sub>3</sub>, 400 MHz

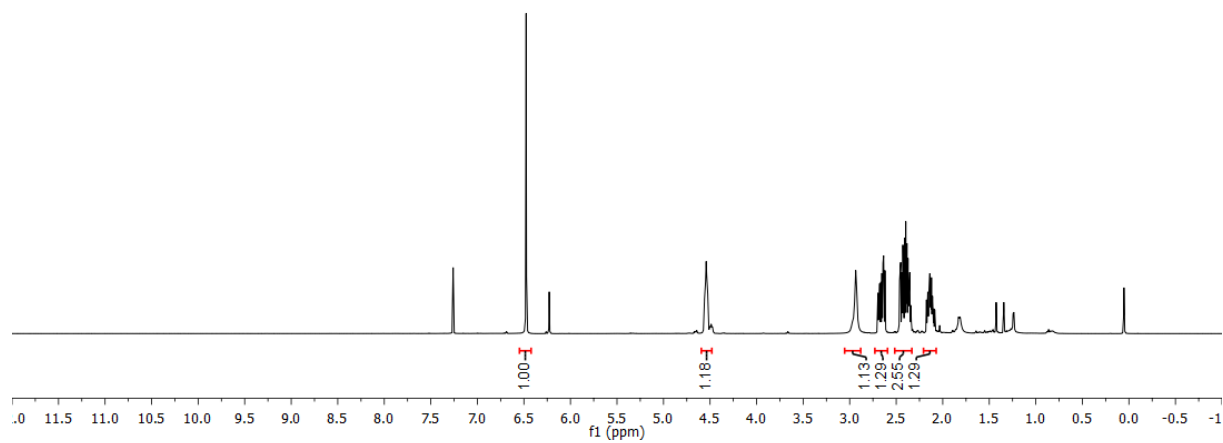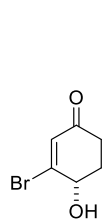

36

CDCl<sub>3</sub>, 100 MHz

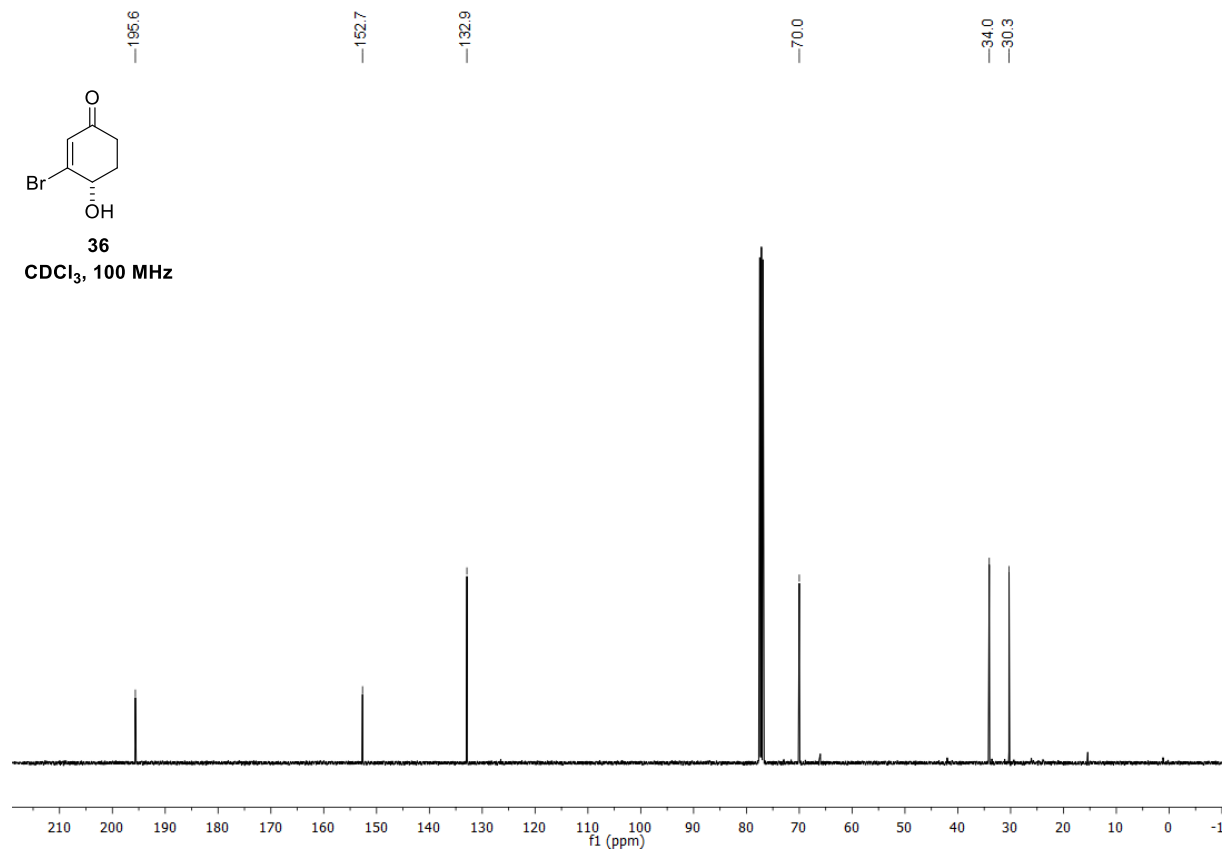

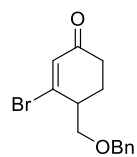

**37a**  
CDCl<sub>3</sub>, 400 MHz

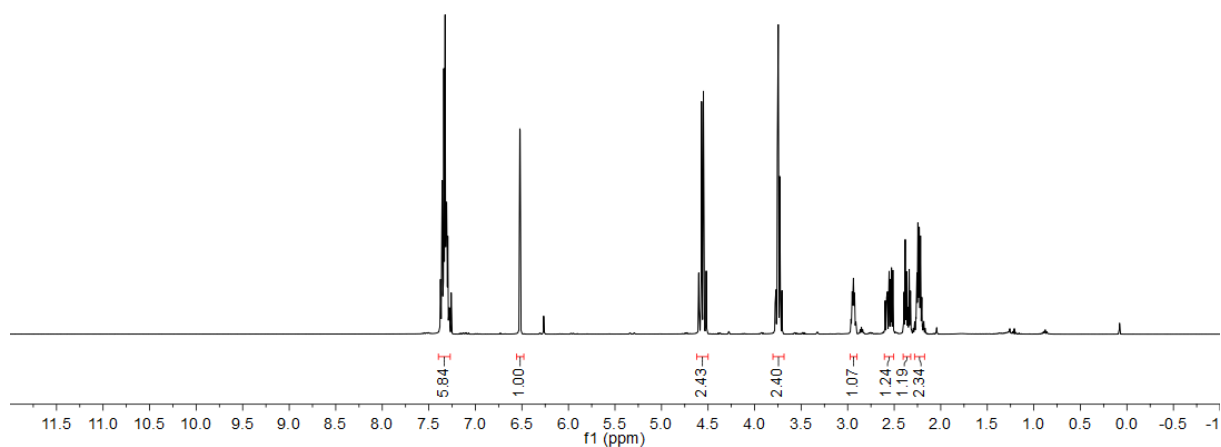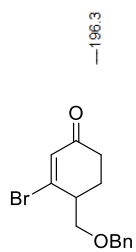

**37a**  
CDCl<sub>3</sub>, 100 MHz

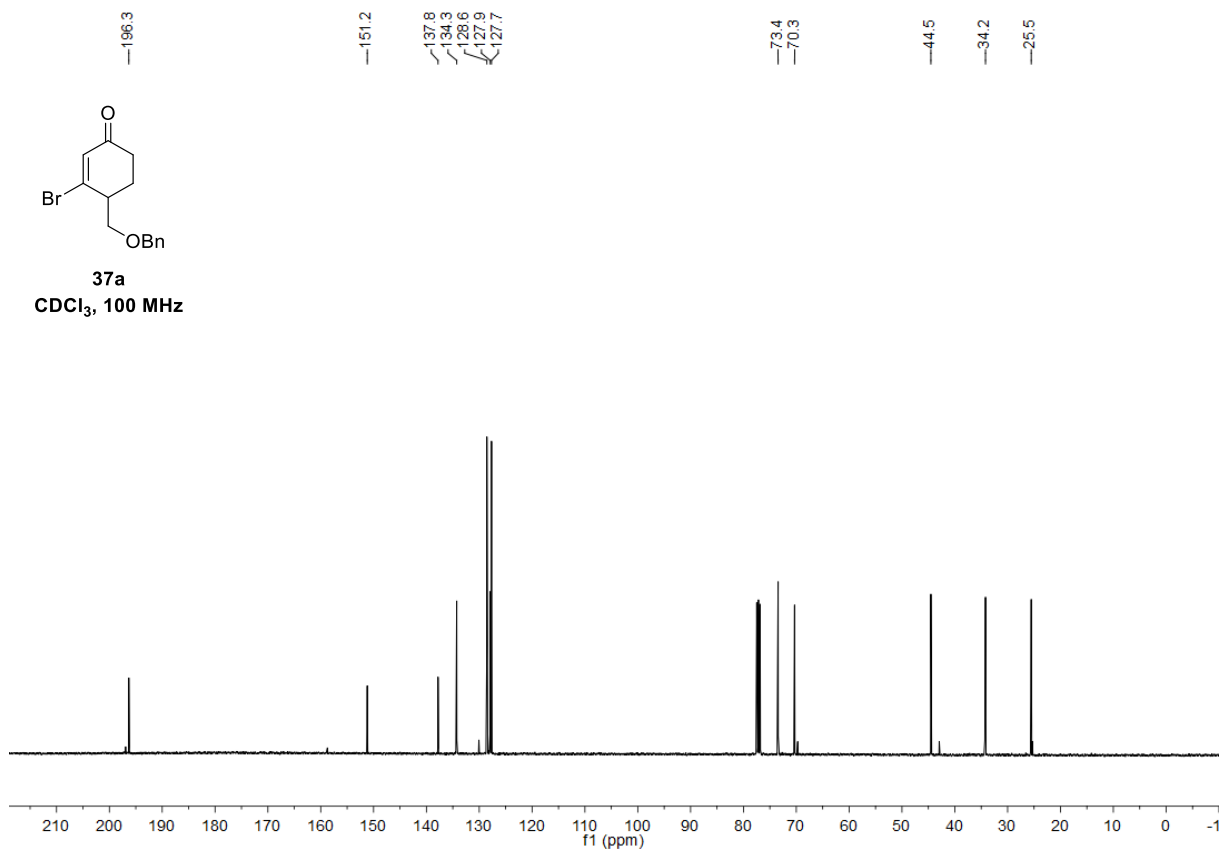



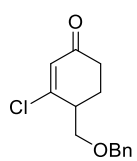

**37b**  
**CDCl<sub>3</sub>, 400 MHz**

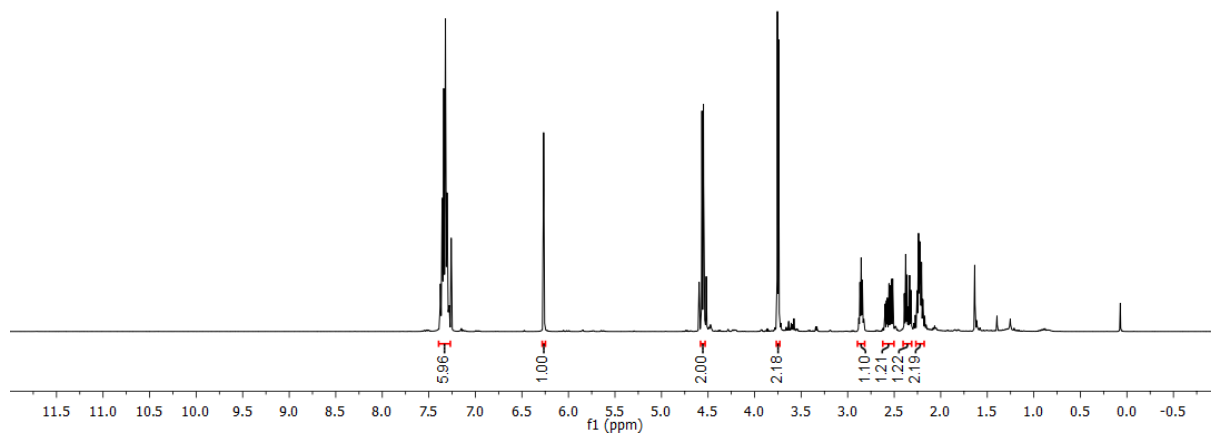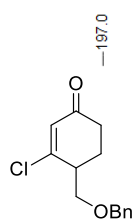

**37b**  
**CDCl<sub>3</sub>, 100 MHz**

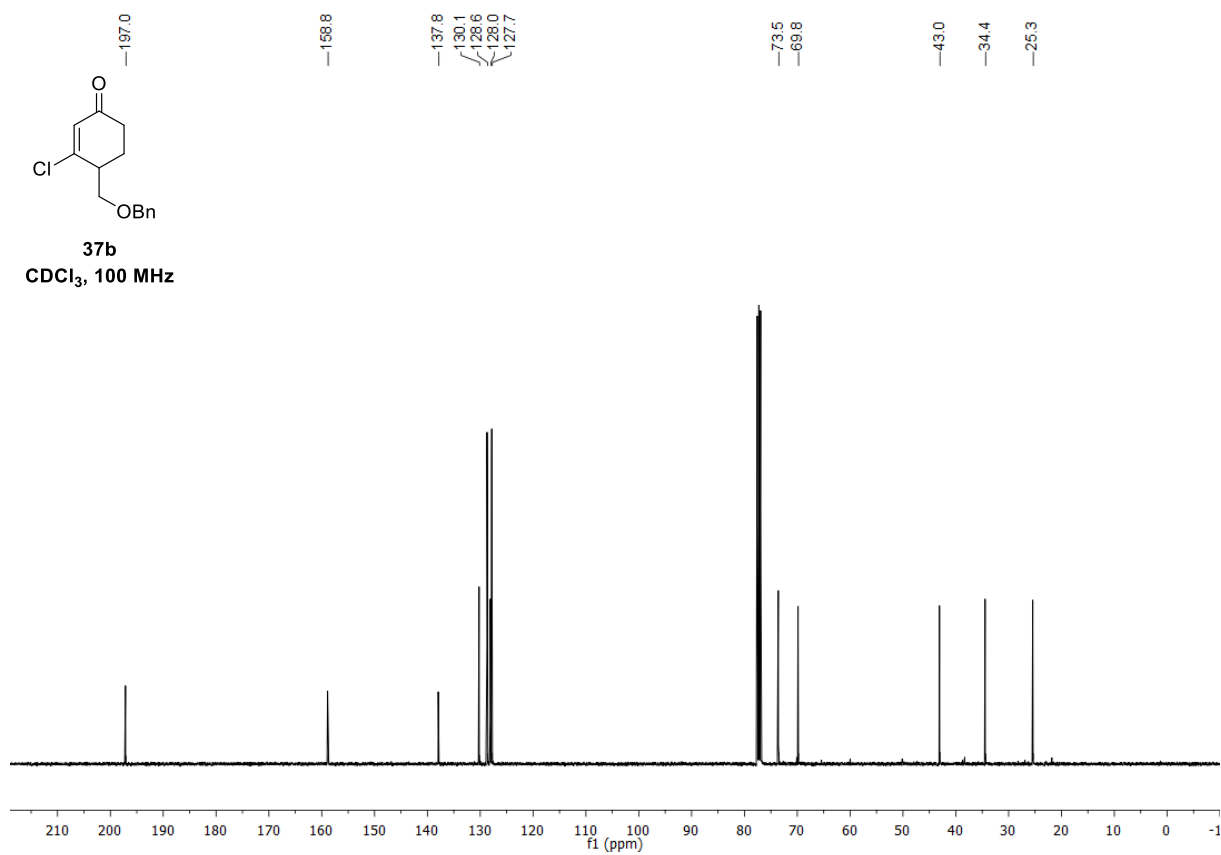

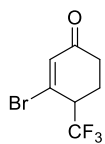

**38**  
CDCl<sub>3</sub>, 400 MHz

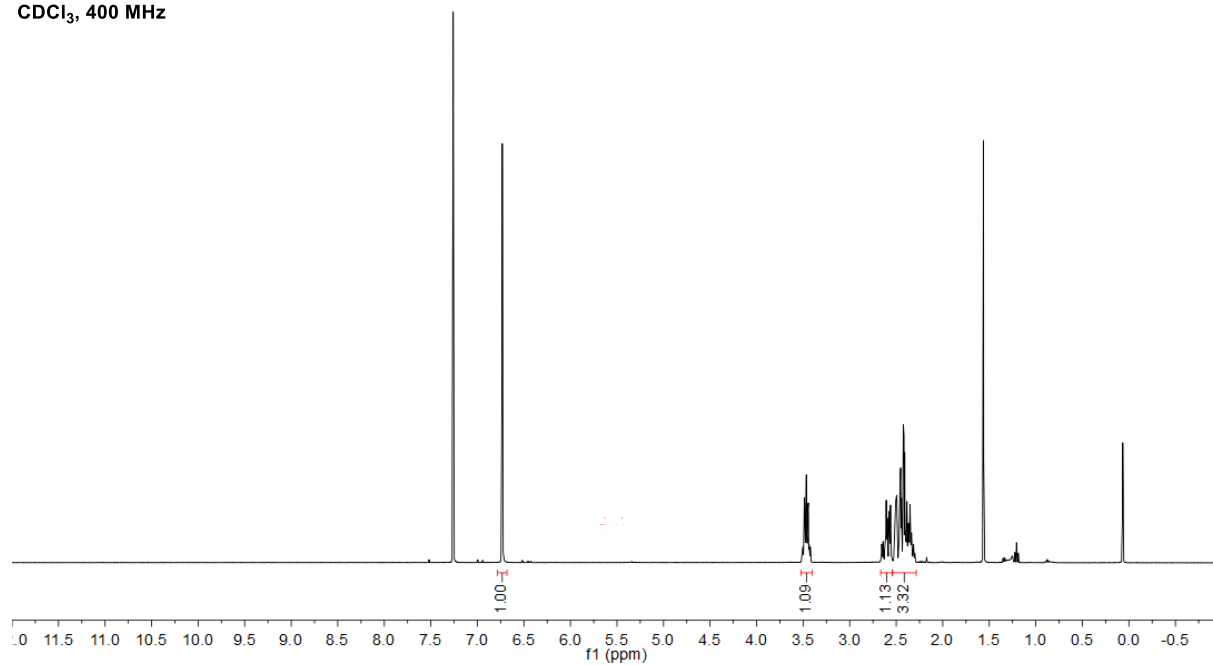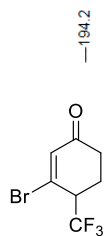

**38**  
CDCl<sub>3</sub>, 100 MHz

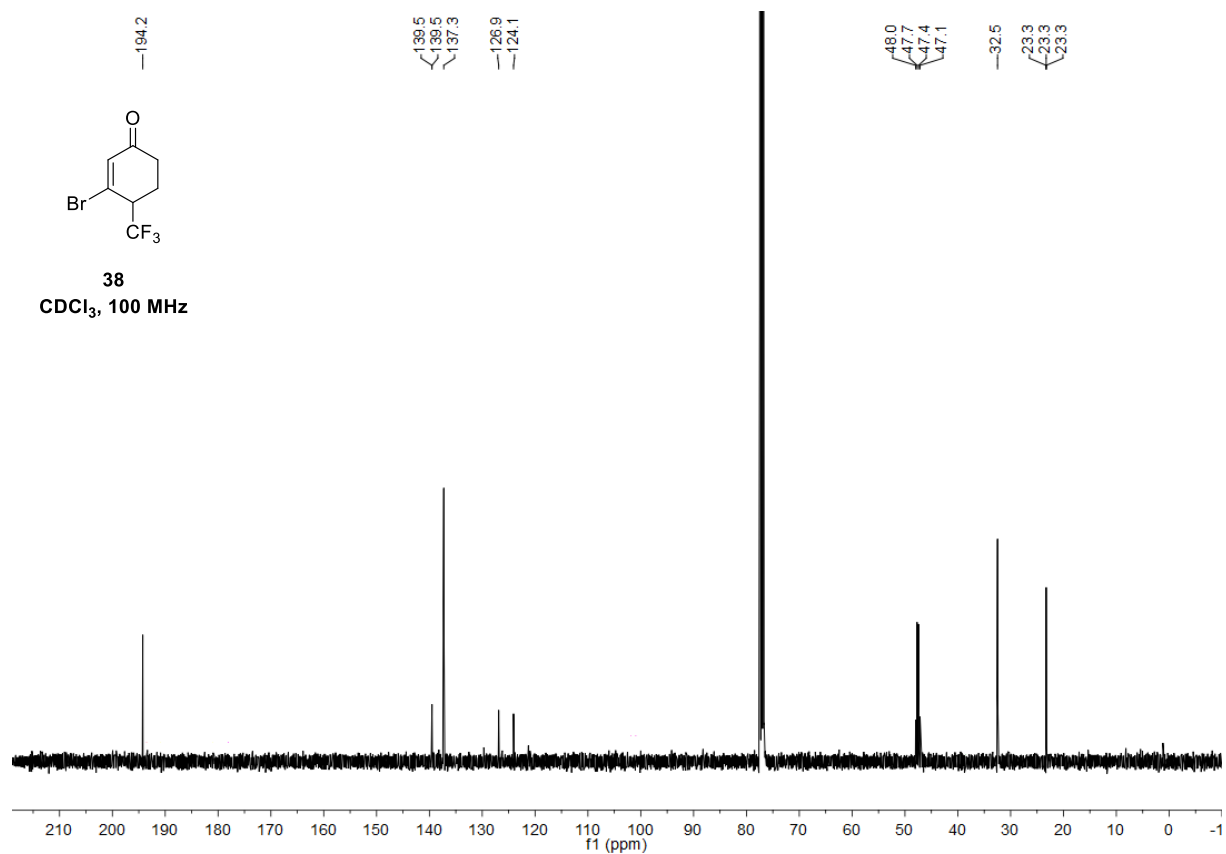

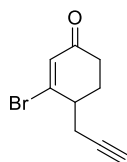

**39a**  
CDCl<sub>3</sub>, 400 MHz

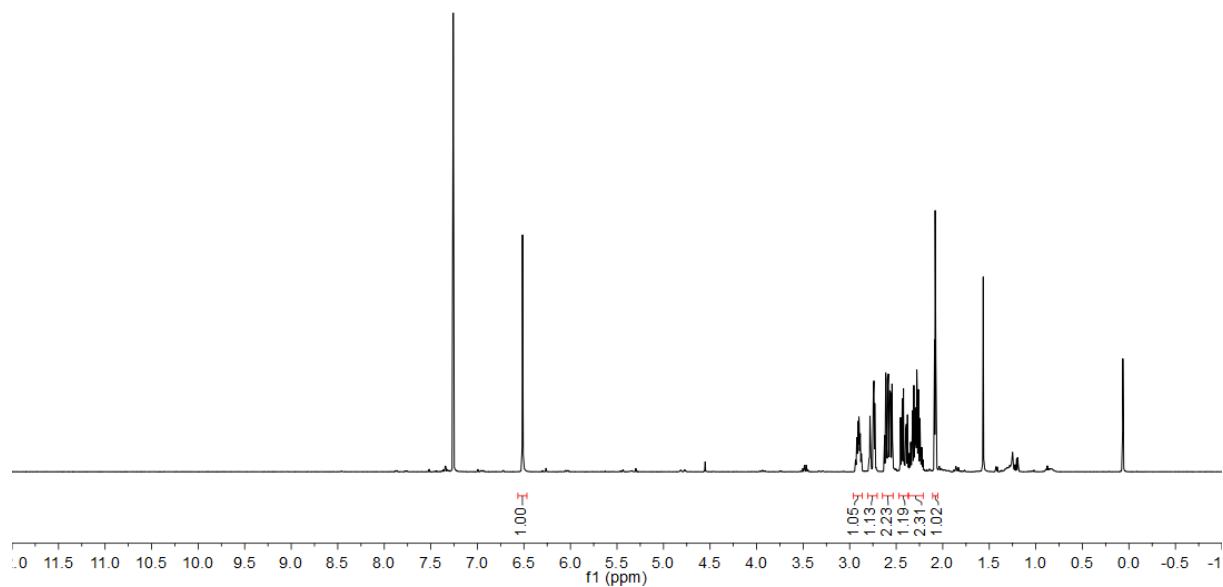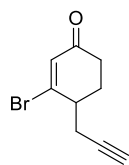

**39a**  
CDCl<sub>3</sub>, 100 MHz

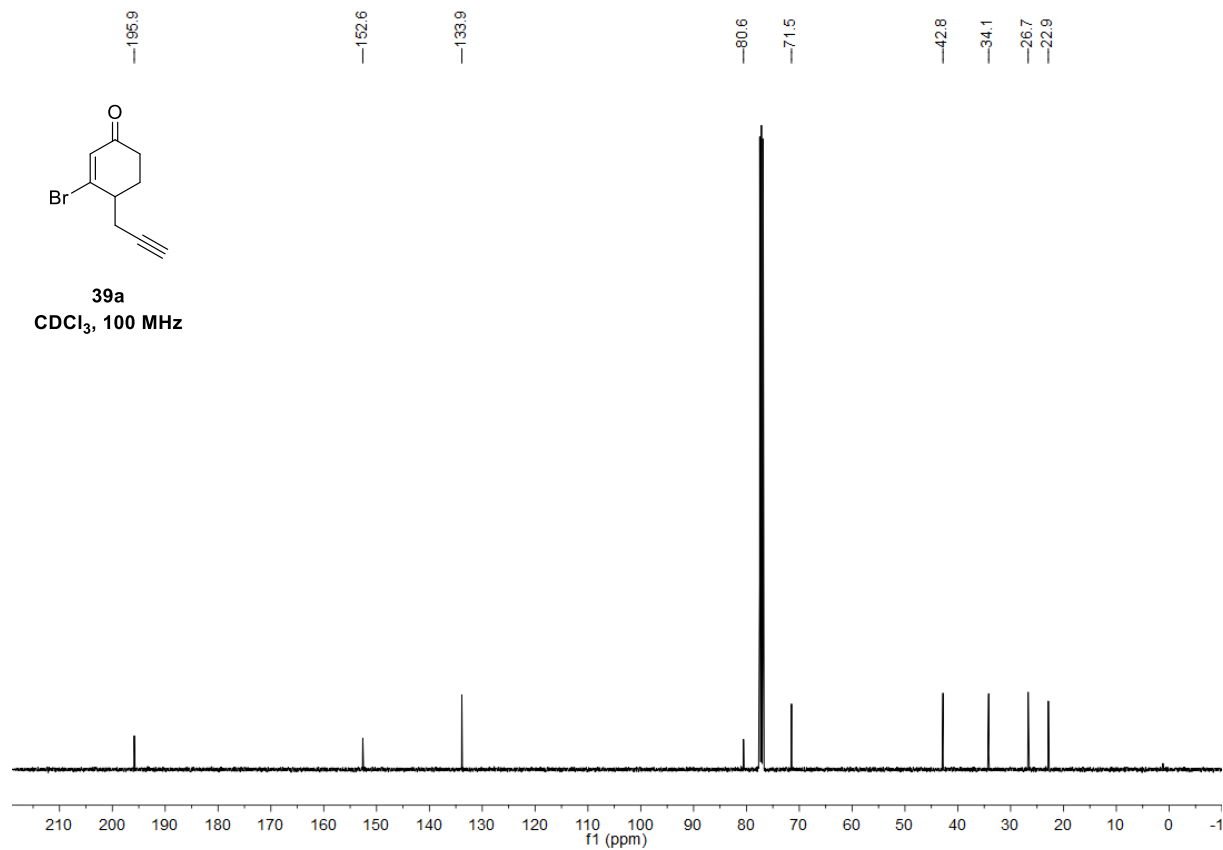

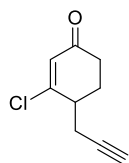

**39b**  
CDCl<sub>3</sub>, 400 MHz

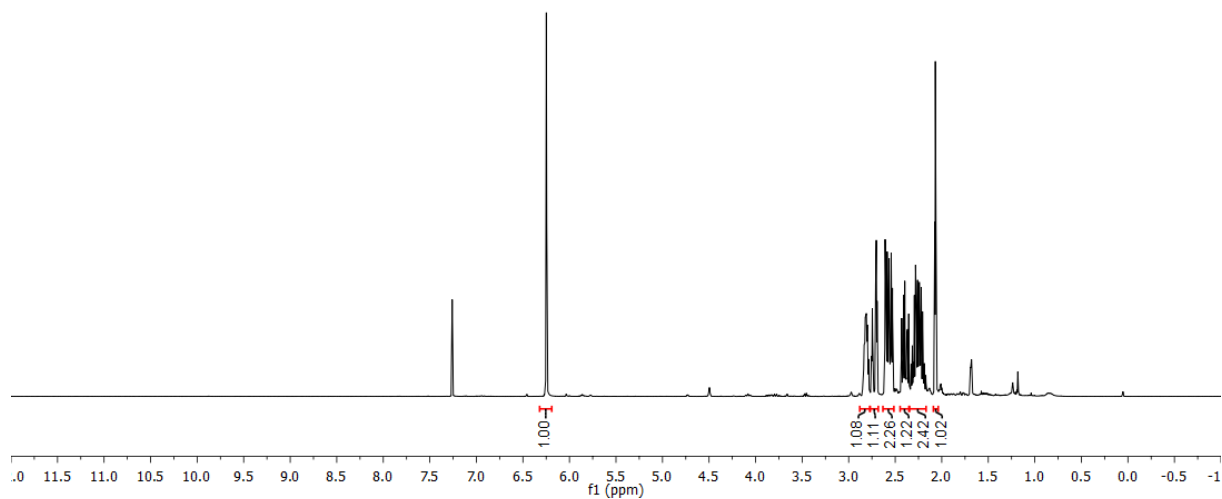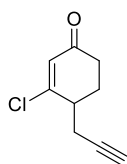

**39b**  
CDCl<sub>3</sub>, 100 MHz

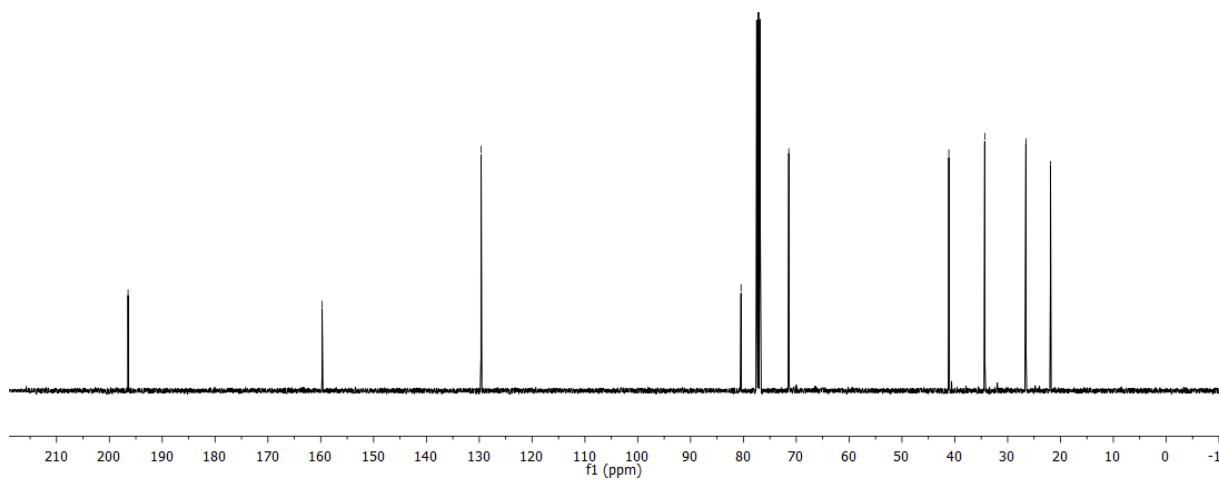

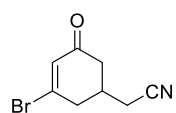

**41**  
**CDCl<sub>3</sub>, 400 MHz**

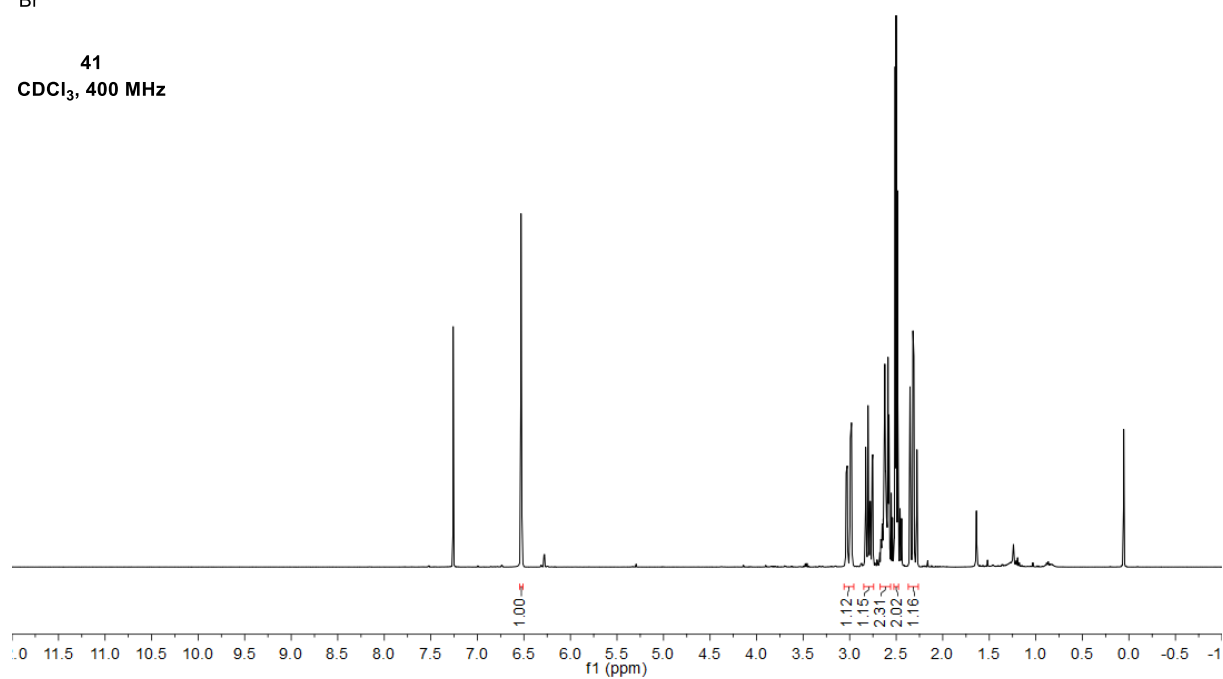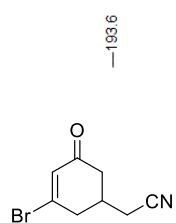

**41**  
**CDCl<sub>3</sub>, 100 MHz**

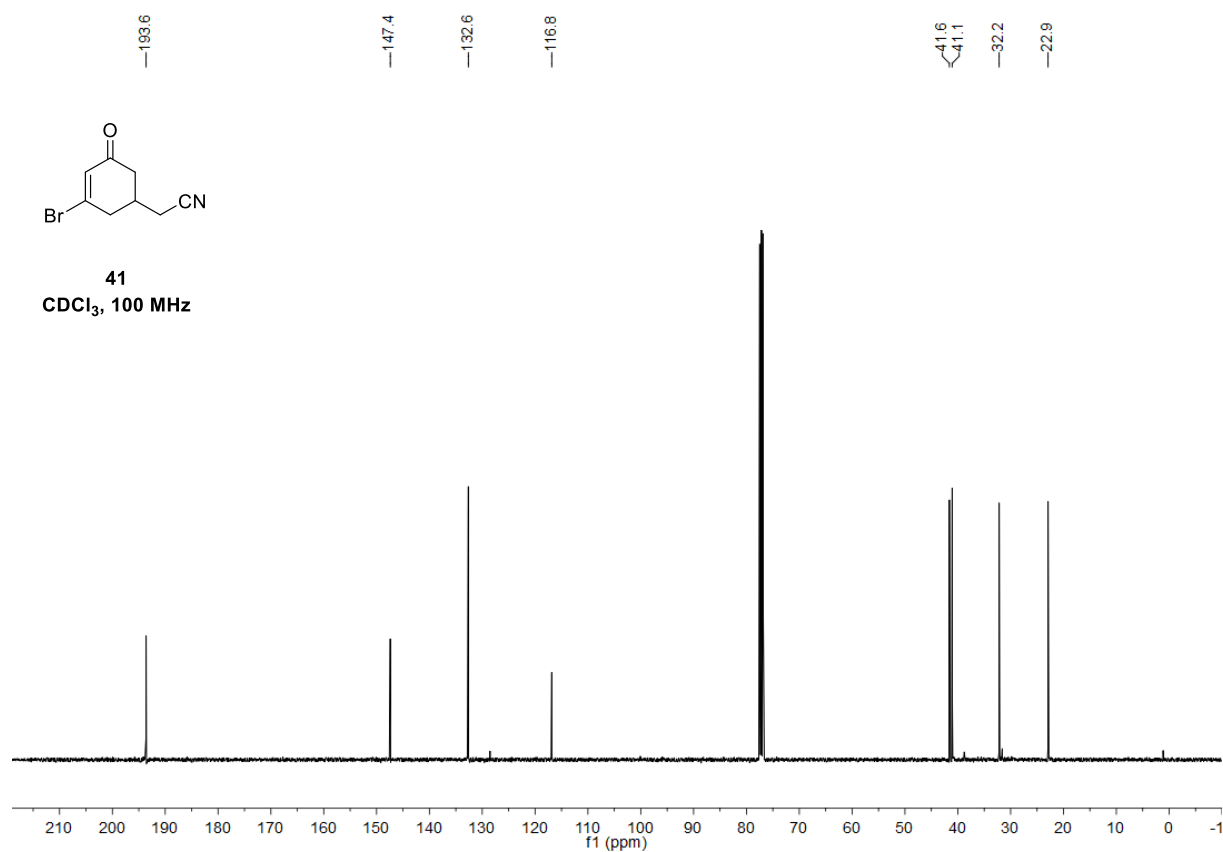

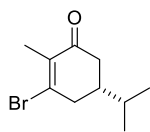

**42**  
**CDCl<sub>3</sub>, 400 MHz**

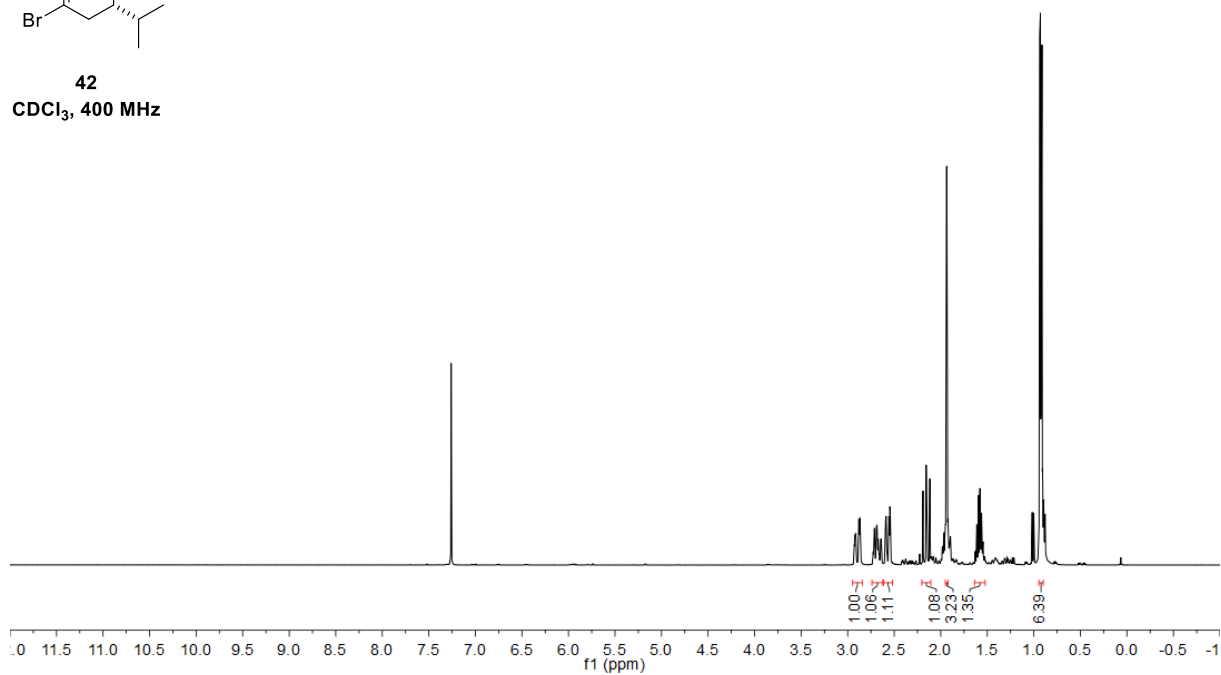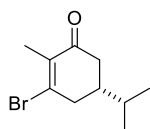

**42**  
**CDCl<sub>3</sub>, 100 MHz**

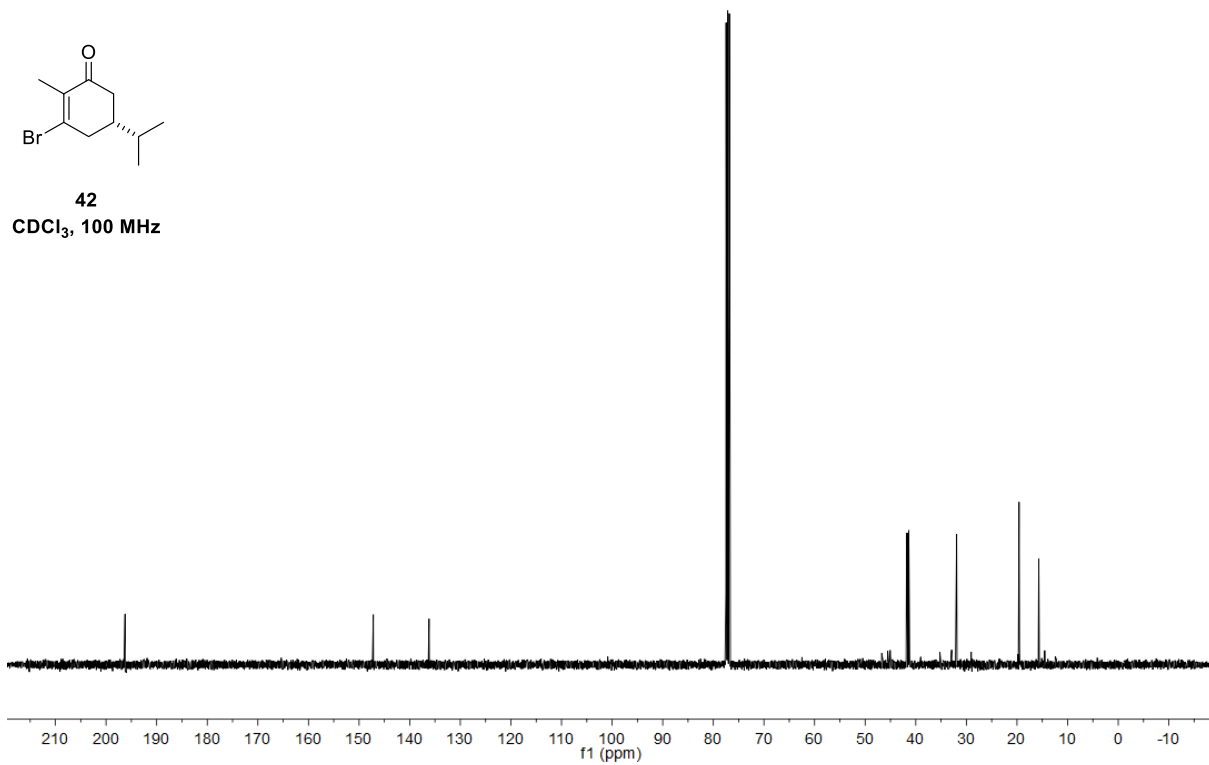

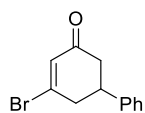

**43a**  
CD<sub>2</sub>Cl<sub>2</sub>, 400 MHz

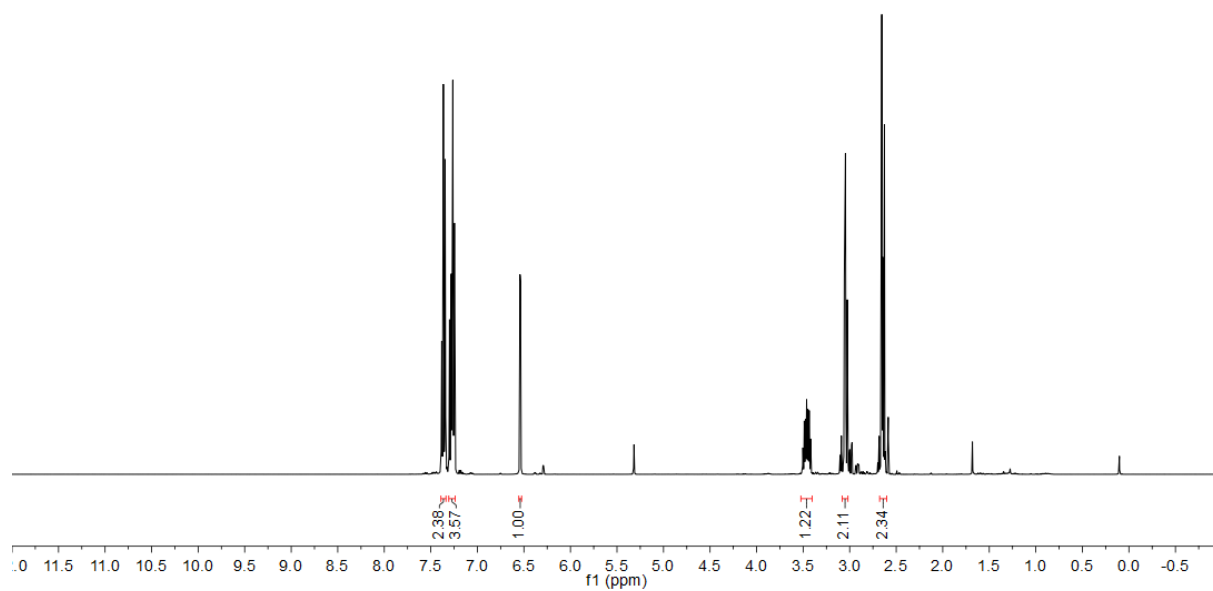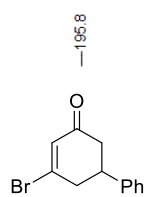

**43a**  
CD<sub>2</sub>Cl<sub>2</sub>, 100 MHz

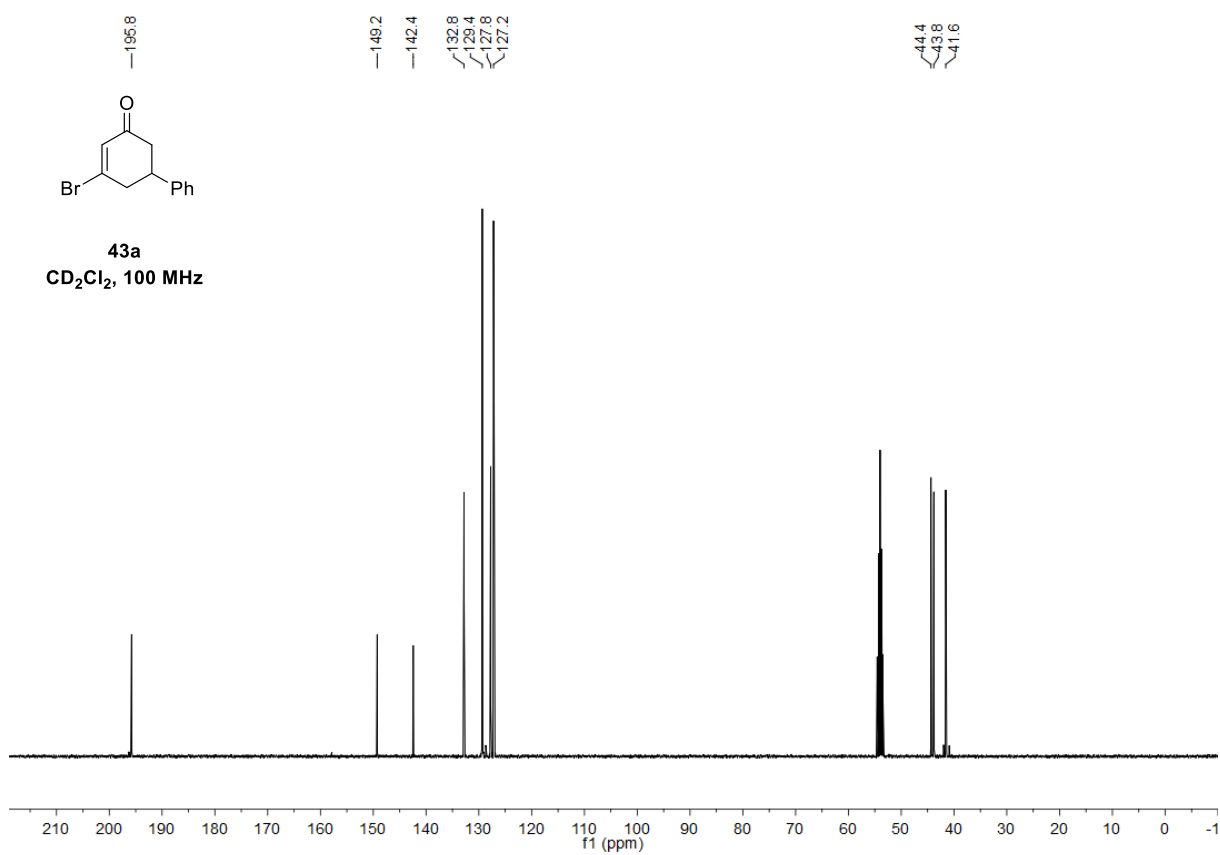

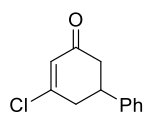

**43b**  
CD<sub>2</sub>Cl<sub>2</sub>, 400 MHz

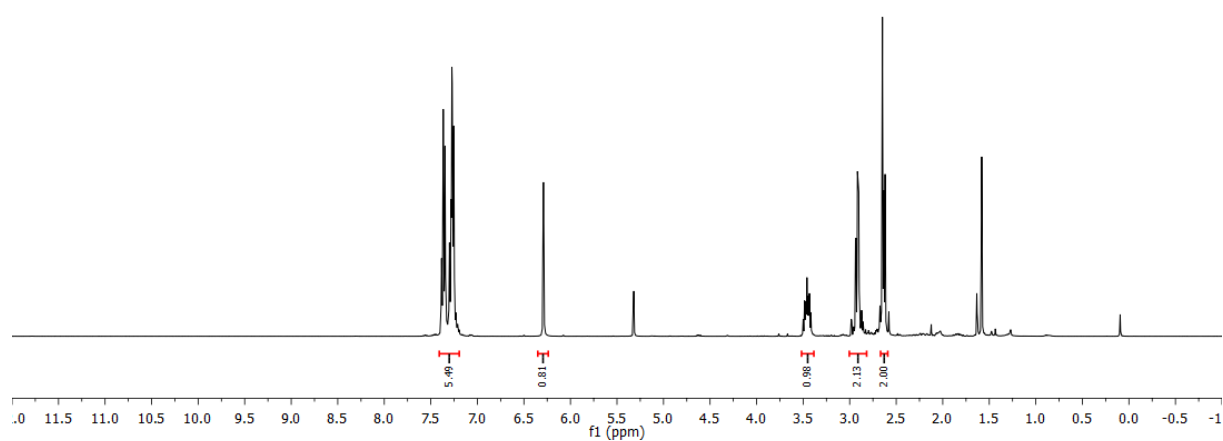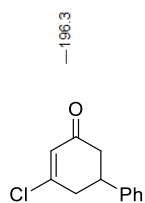

**43b**  
CD<sub>2</sub>Cl<sub>2</sub>, 100 MHz

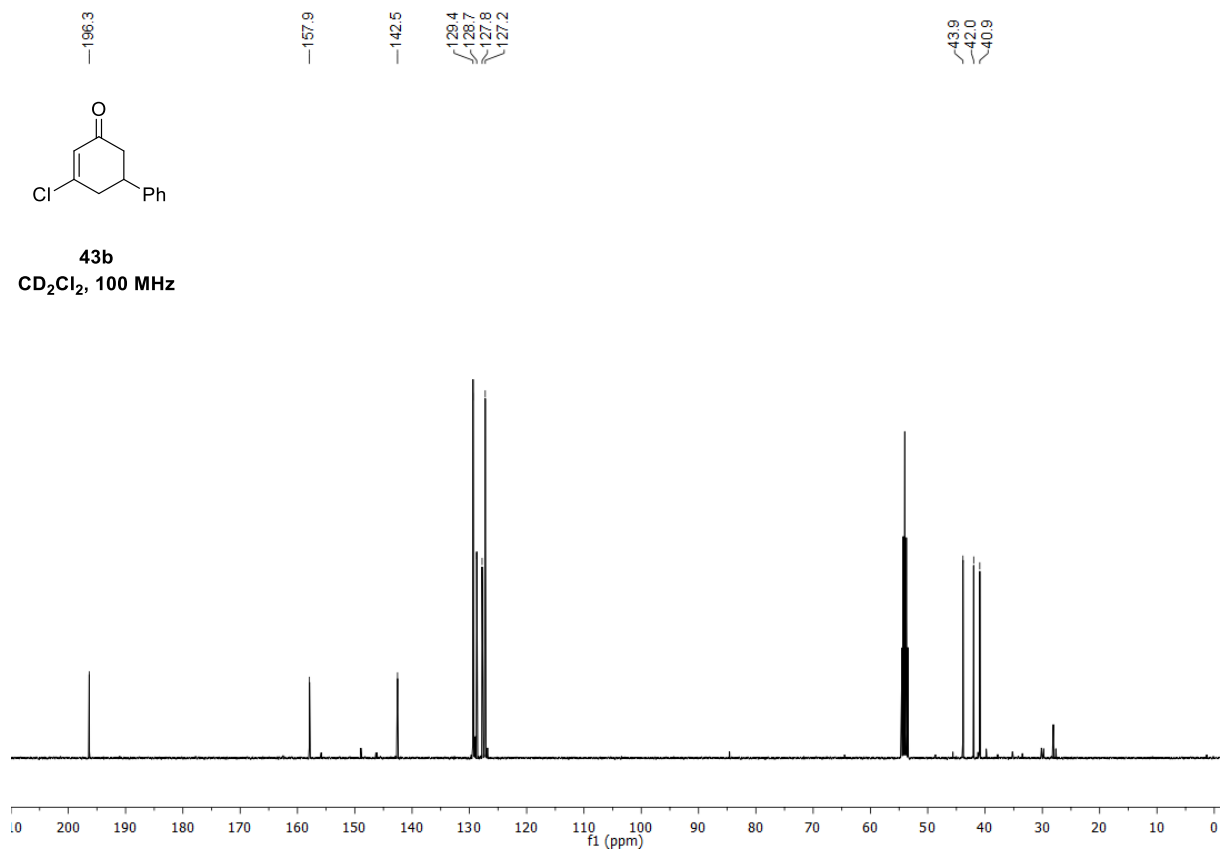



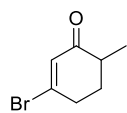

**44a**  
CDCl<sub>3</sub>, 400 MHz

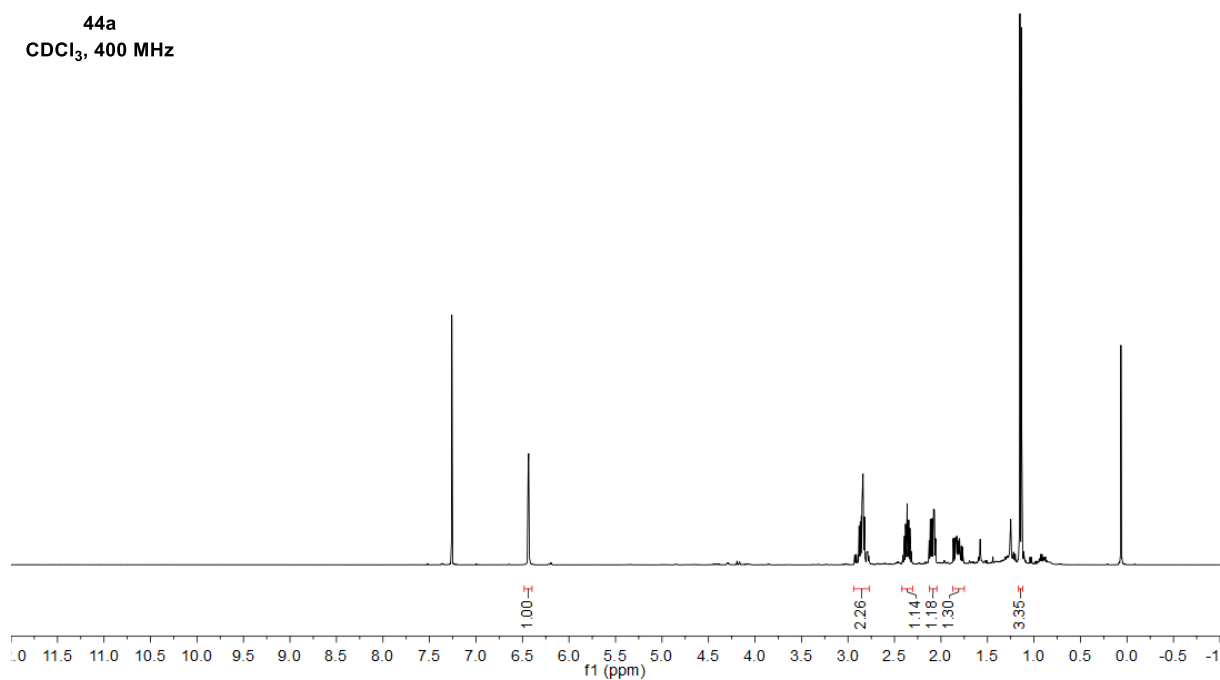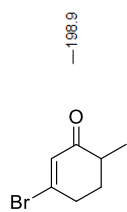

**44a**  
CDCl<sub>3</sub>, 100 MHz

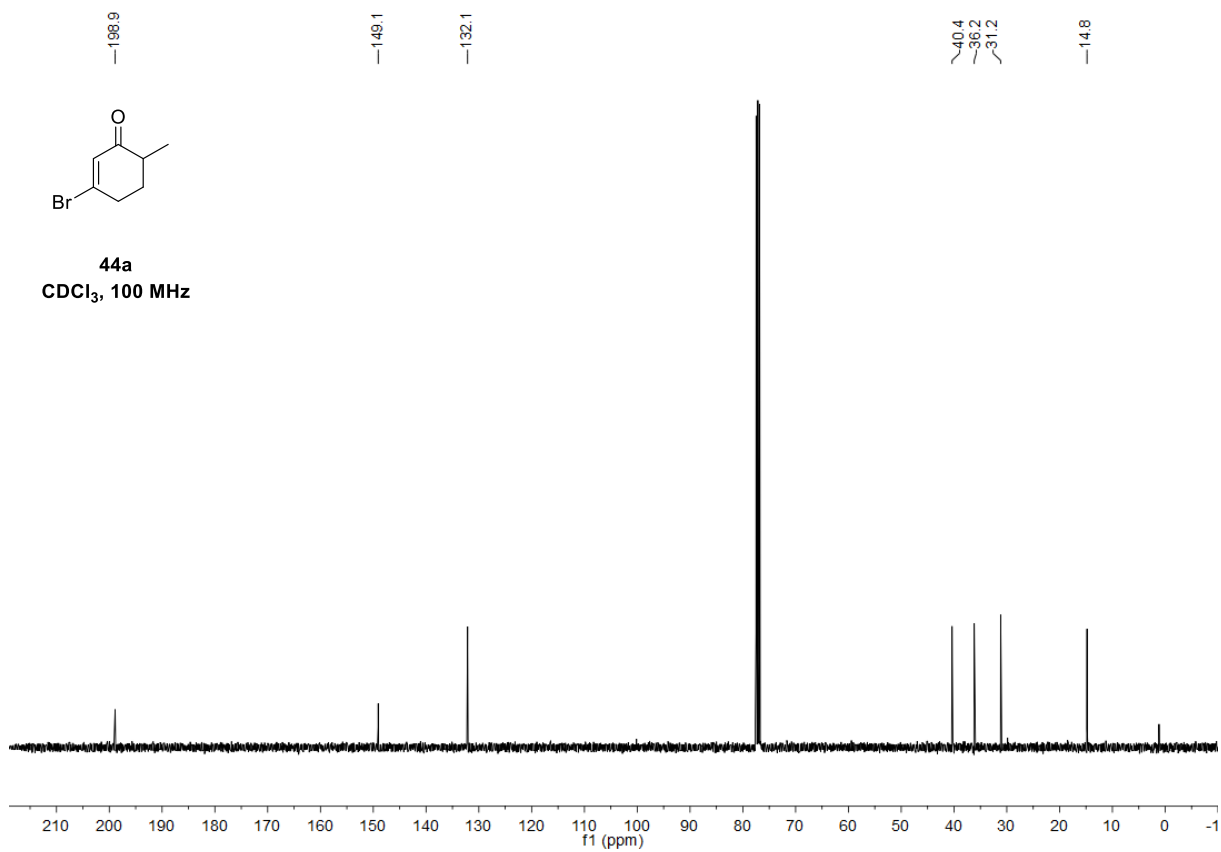

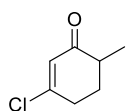

**44b**  
CDCl<sub>3</sub>, 400 MHz

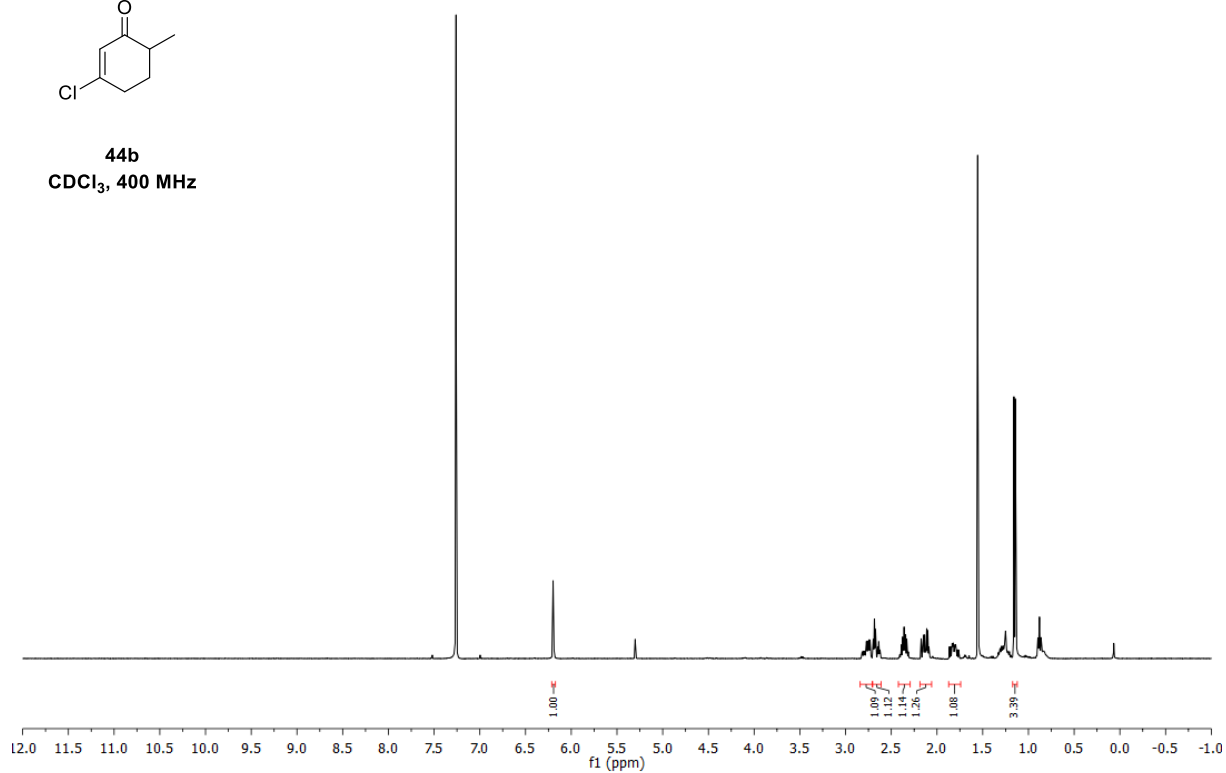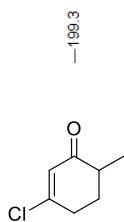

**44b**  
CDCl<sub>3</sub>, 100 MHz

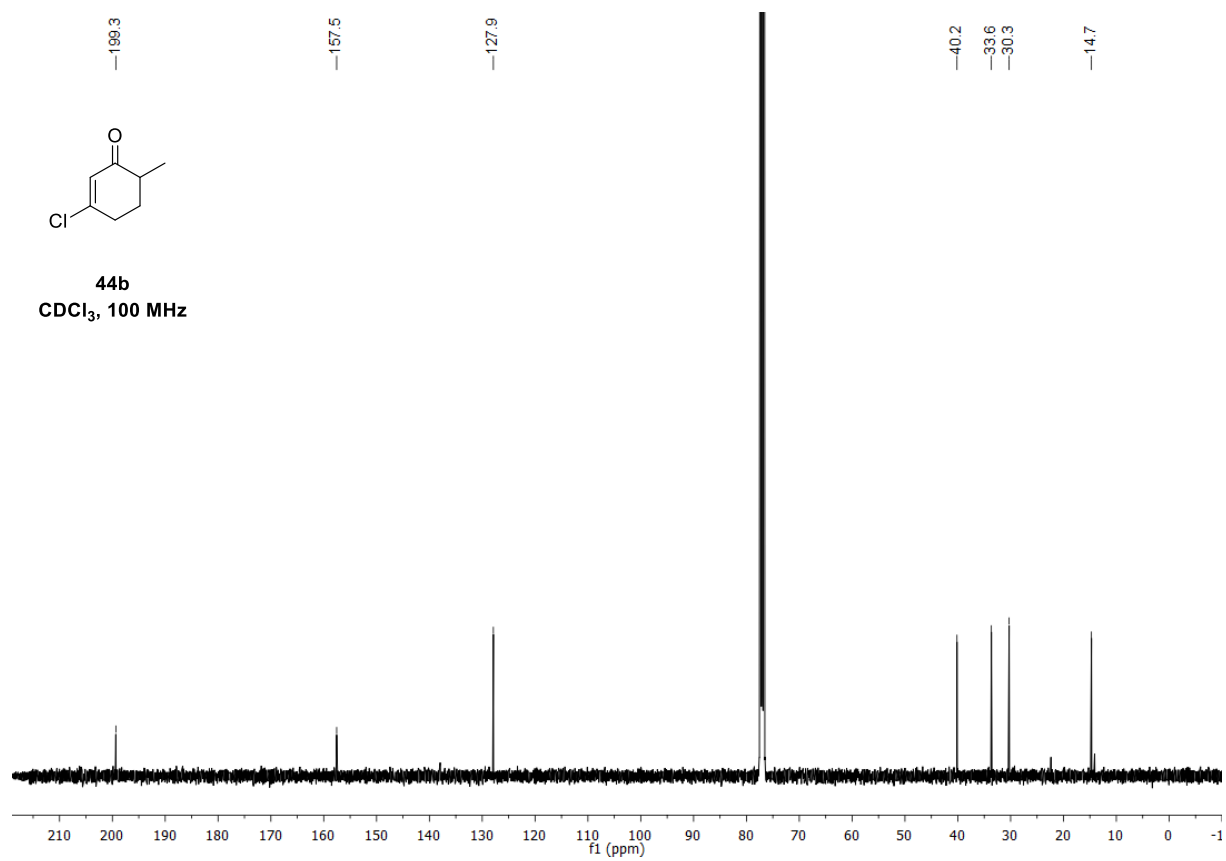

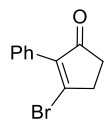

**46**  
CD<sub>2</sub>Cl<sub>2</sub>, 400 MHz

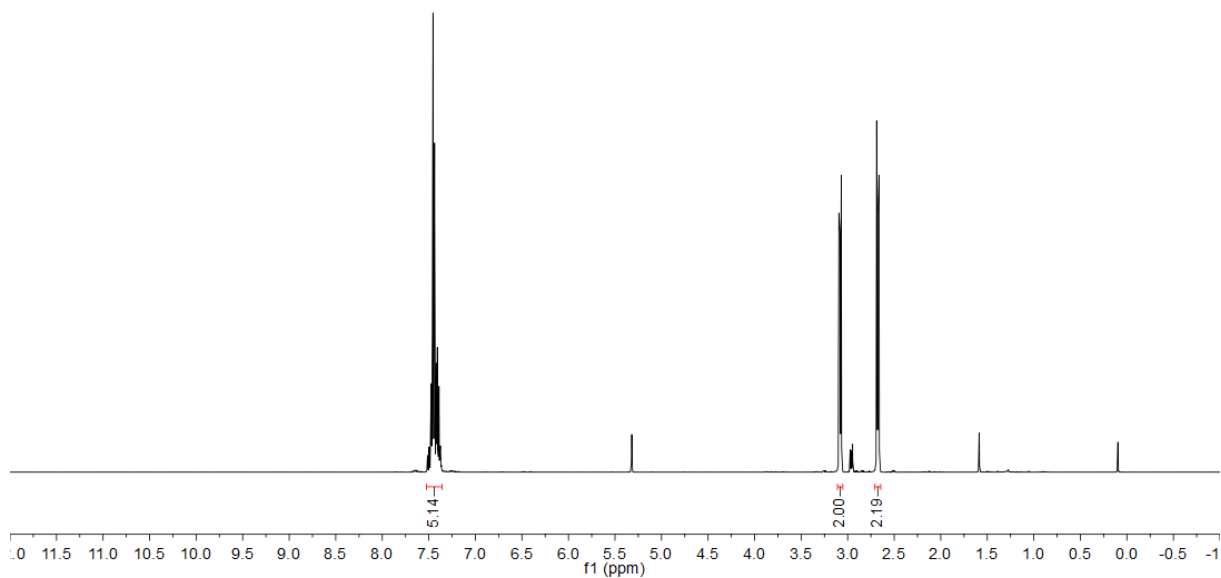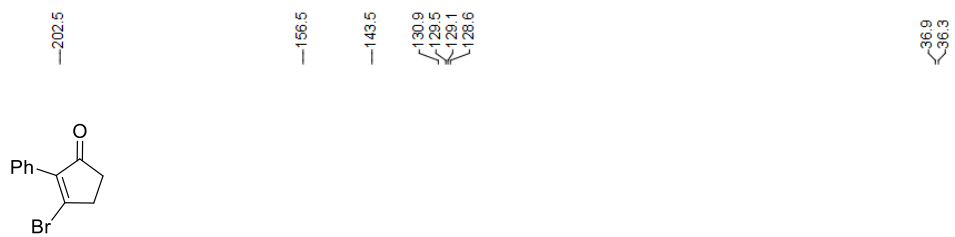

**46**  
CD<sub>2</sub>Cl<sub>2</sub>, 100 MHz

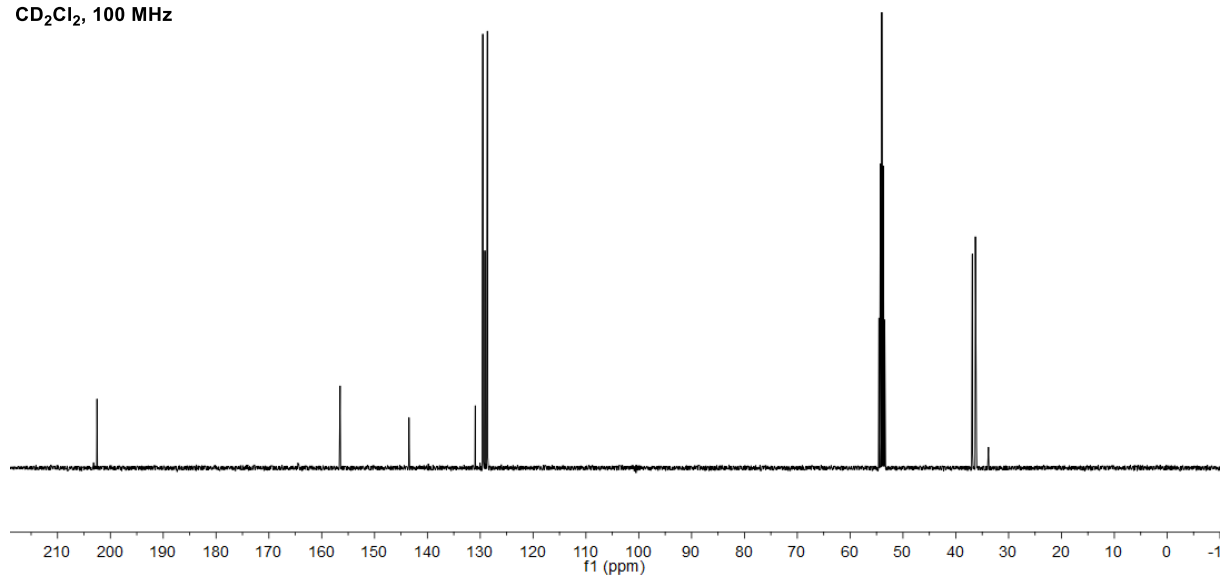

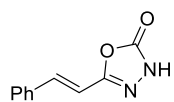

**50**  
DMSO-*d*<sub>6</sub>, 400 MHz

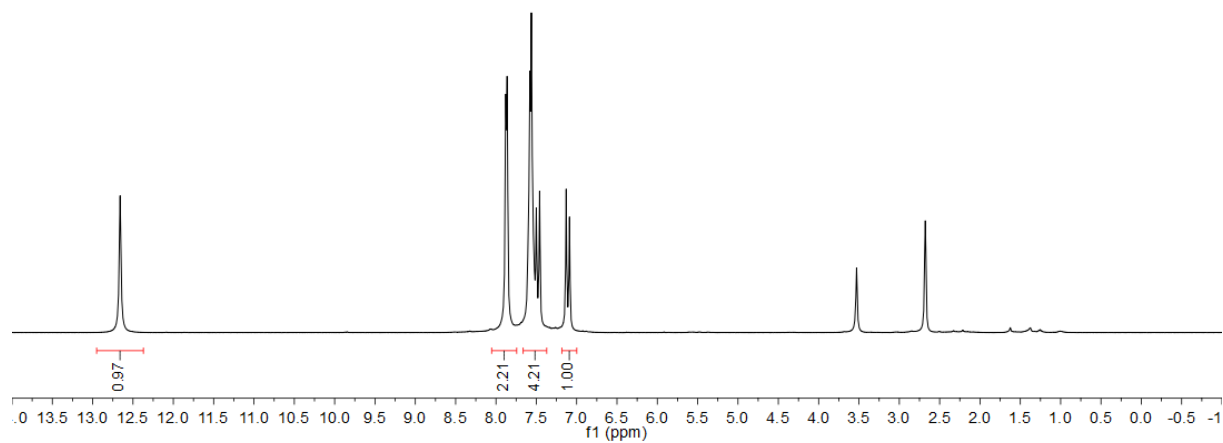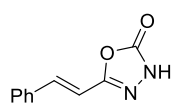

**50**  
DMSO-*d*<sub>6</sub>, 100 MHz

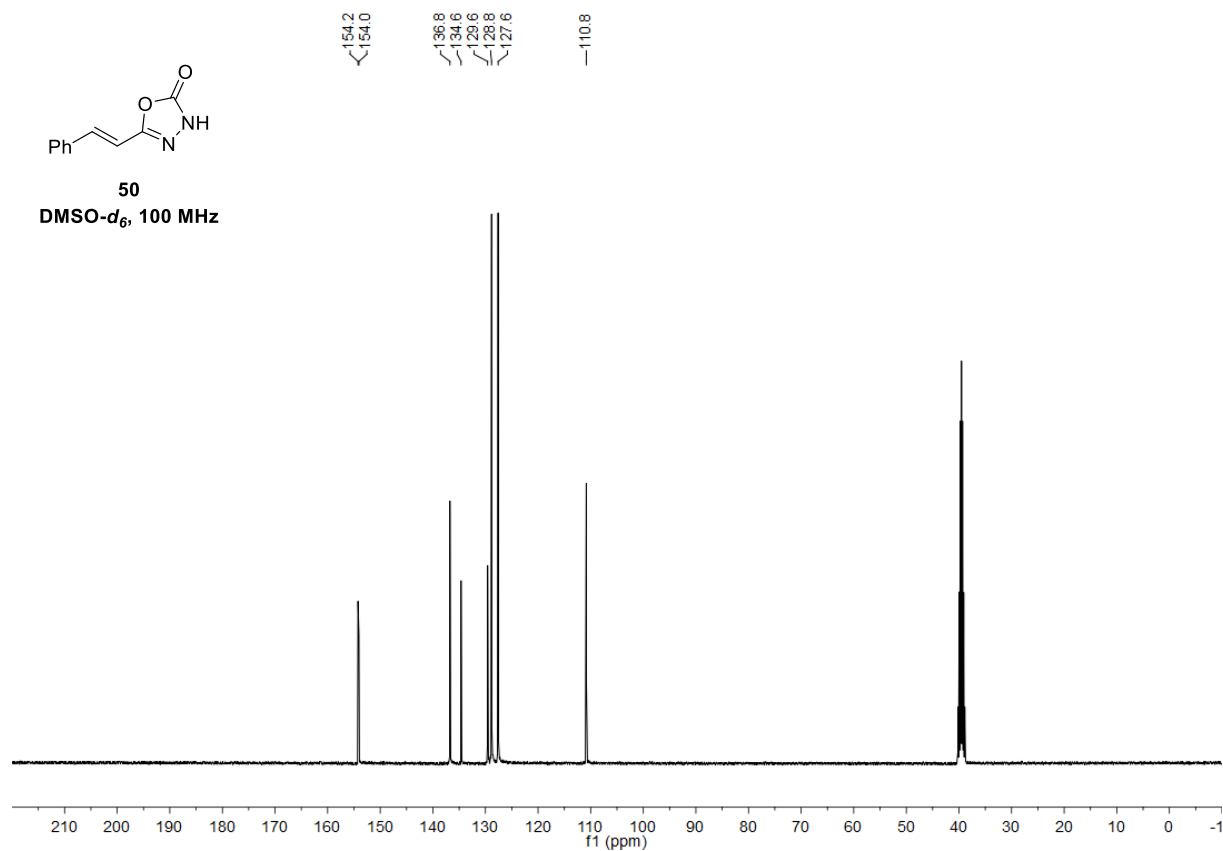

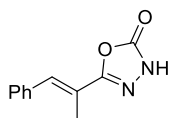

**51**  
**CD<sub>2</sub>Cl<sub>2</sub>, 400 MHz**

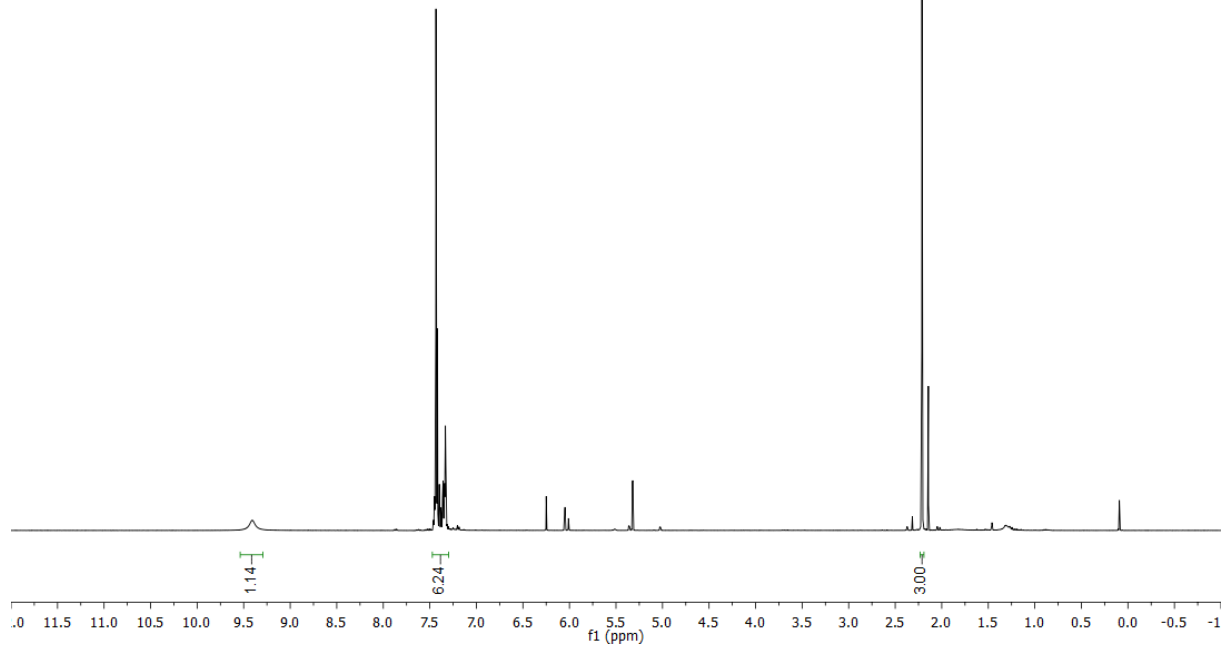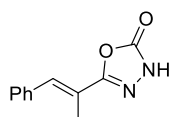

**51**  
**CD<sub>2</sub>Cl<sub>2</sub>, 100 MHz**

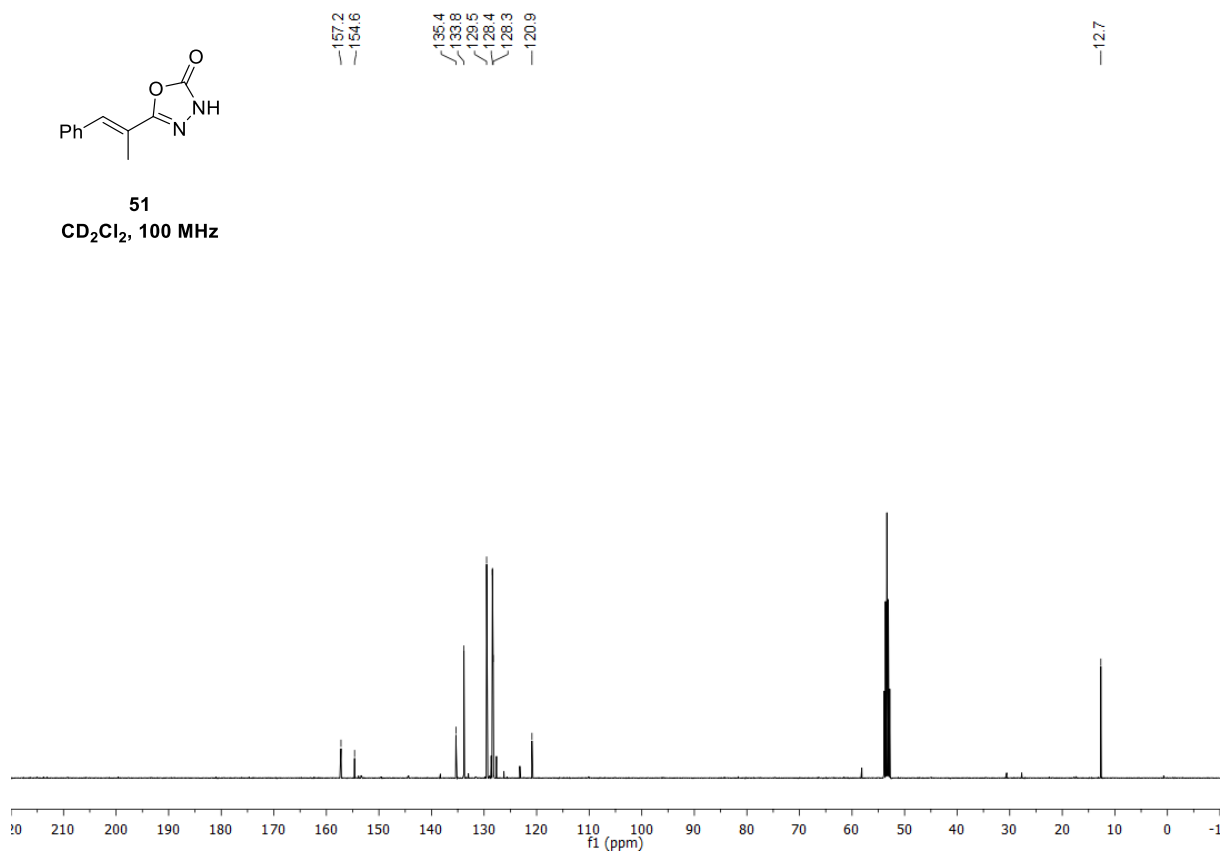

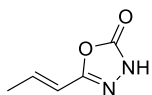

**52**  
CDCl<sub>3</sub>, 300 MHz

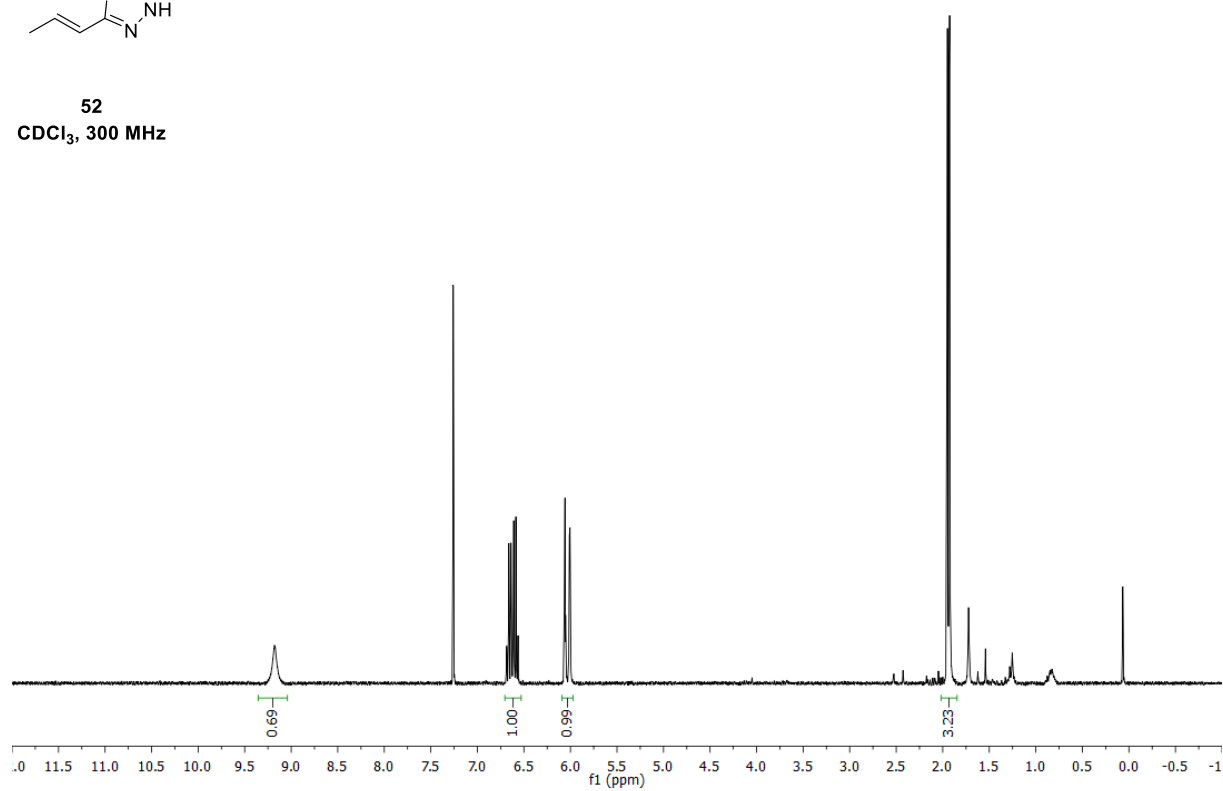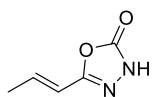

**52**  
CDCl<sub>3</sub>, 75 MHz

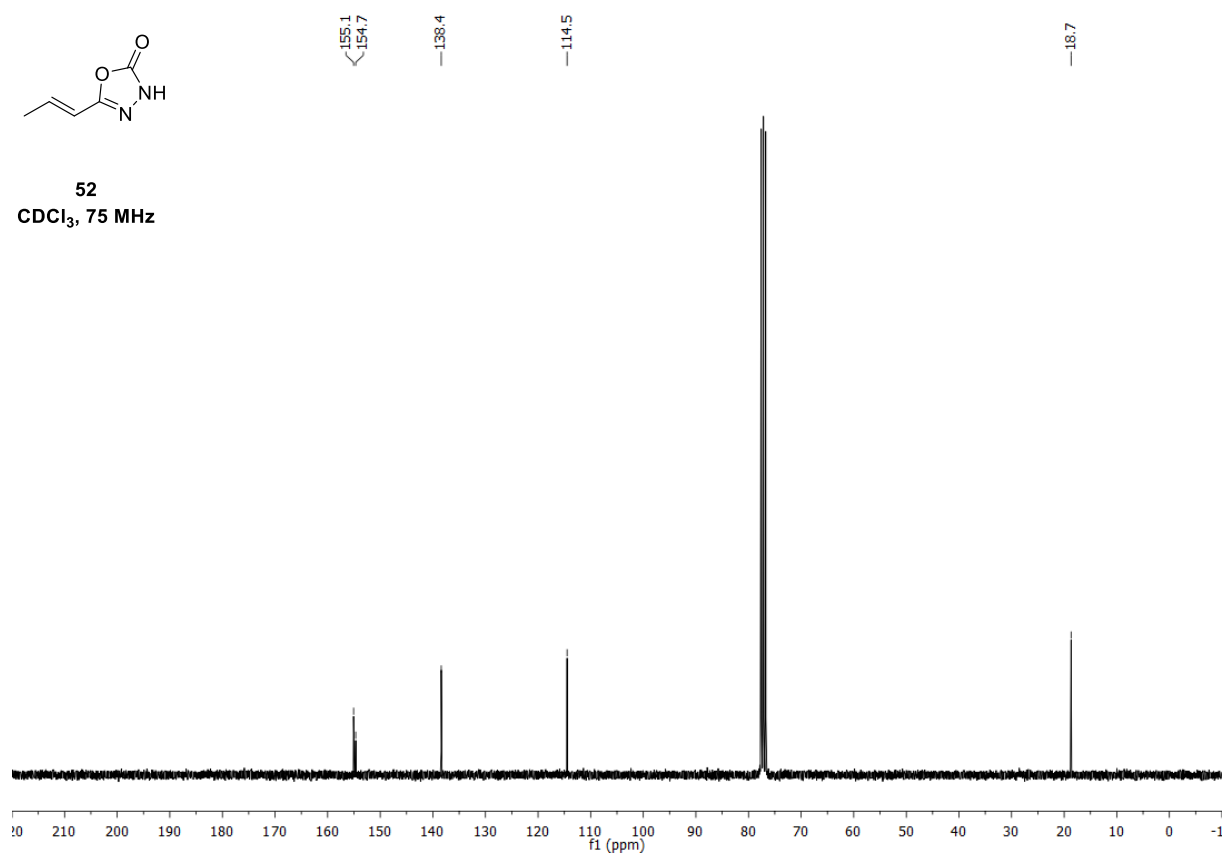

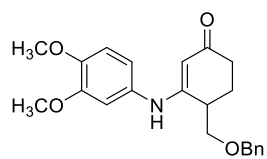

**55**  
**CD<sub>2</sub>Cl<sub>2</sub>, 400 MHz**

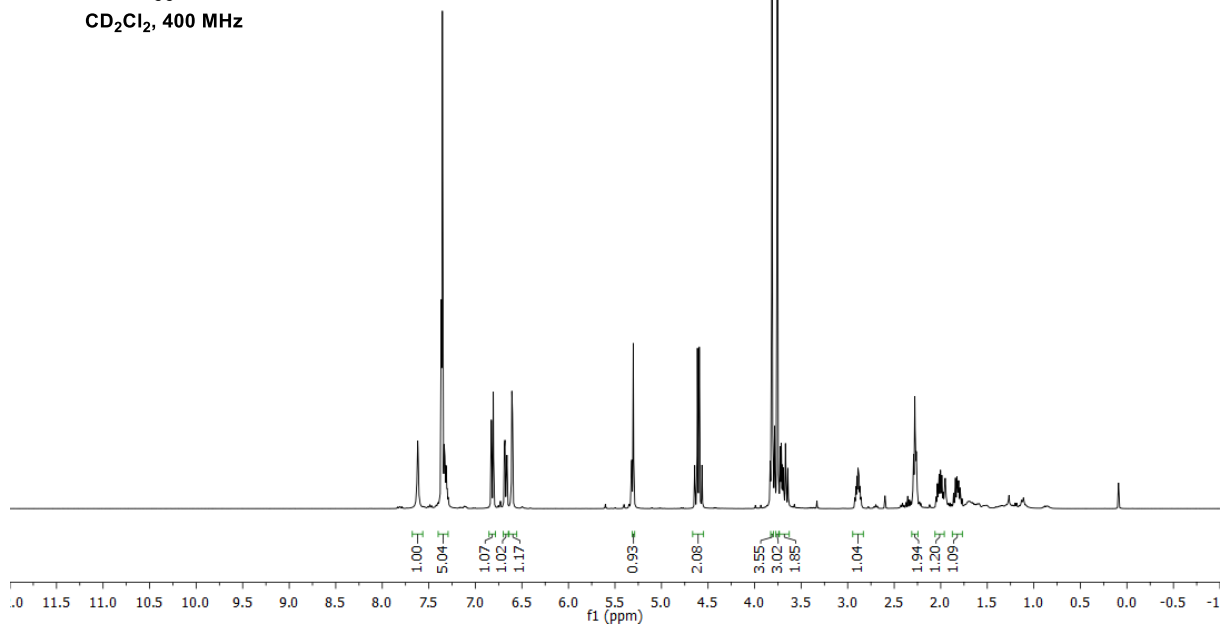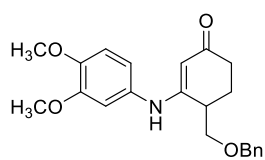

**55**  
**CD<sub>2</sub>Cl<sub>2</sub>, 100 MHz**

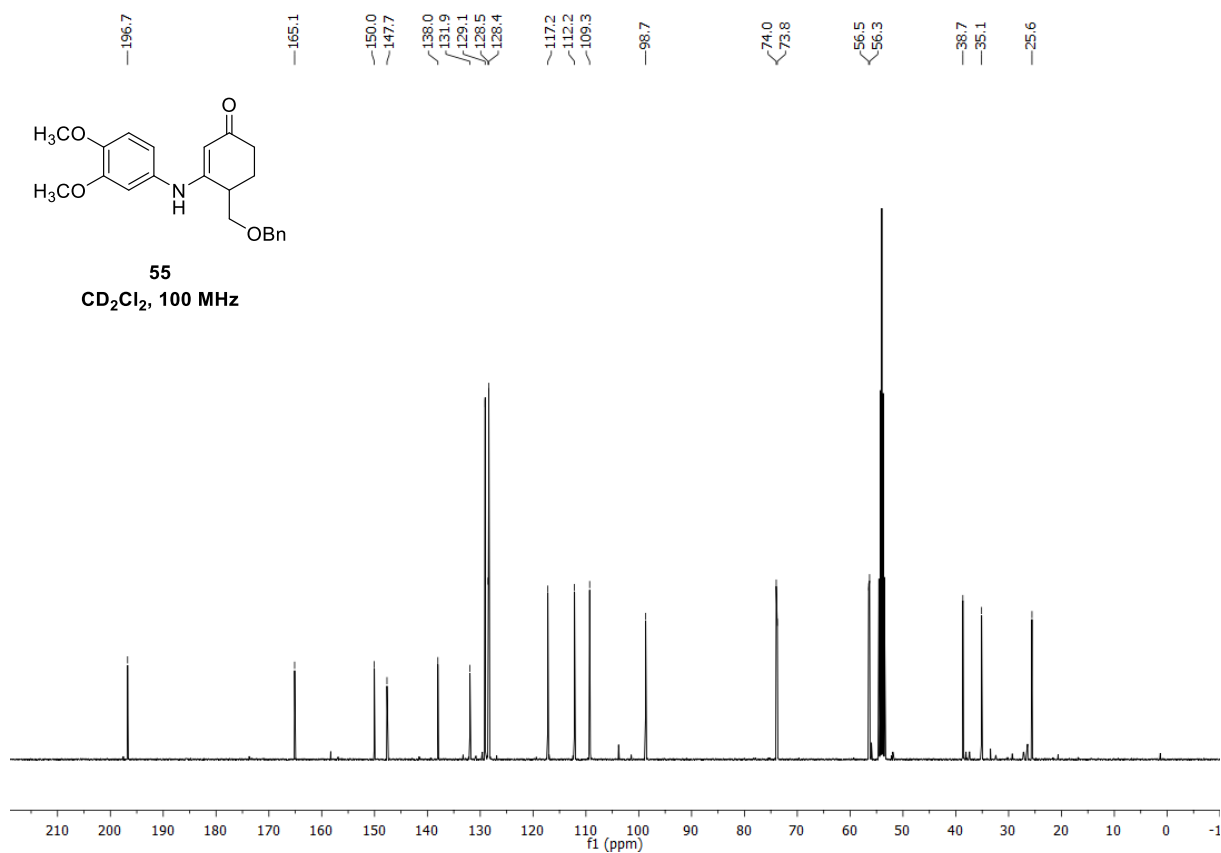

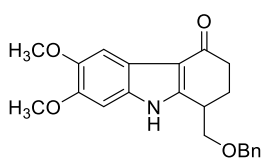

**56**  
**CD<sub>2</sub>Cl<sub>2</sub>, 400 MHz**

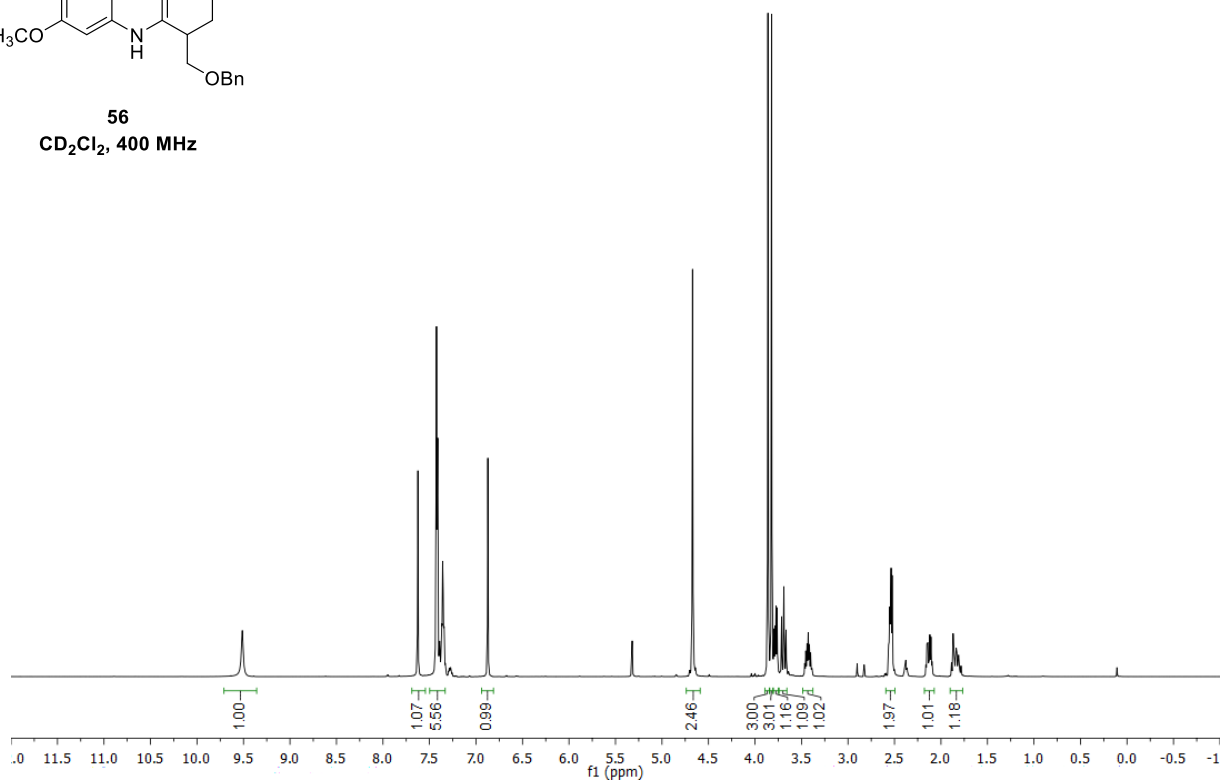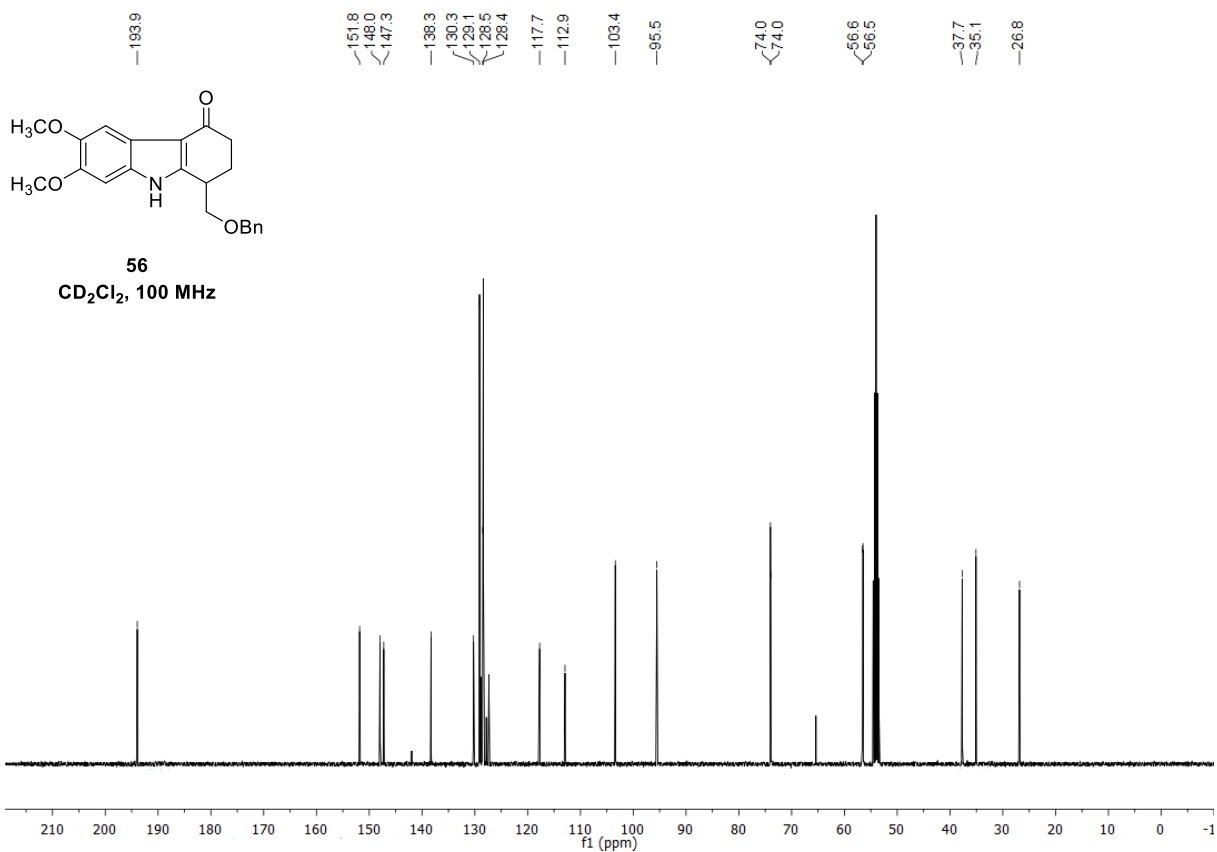

Supplement: Supplementary file 1 [file 3828325]
